# Supplementary material for: The oncogenic role of treacle ribosome biogenesis factor 1 (TCOF1) in human tumors: a pan-cancer analysis
Source: publisher site journal article supplement (doi:10.18632/aging.203852), 2022-01-30

## Survival Analyses of TCOF1 in Pan-cancer via Prognoscan

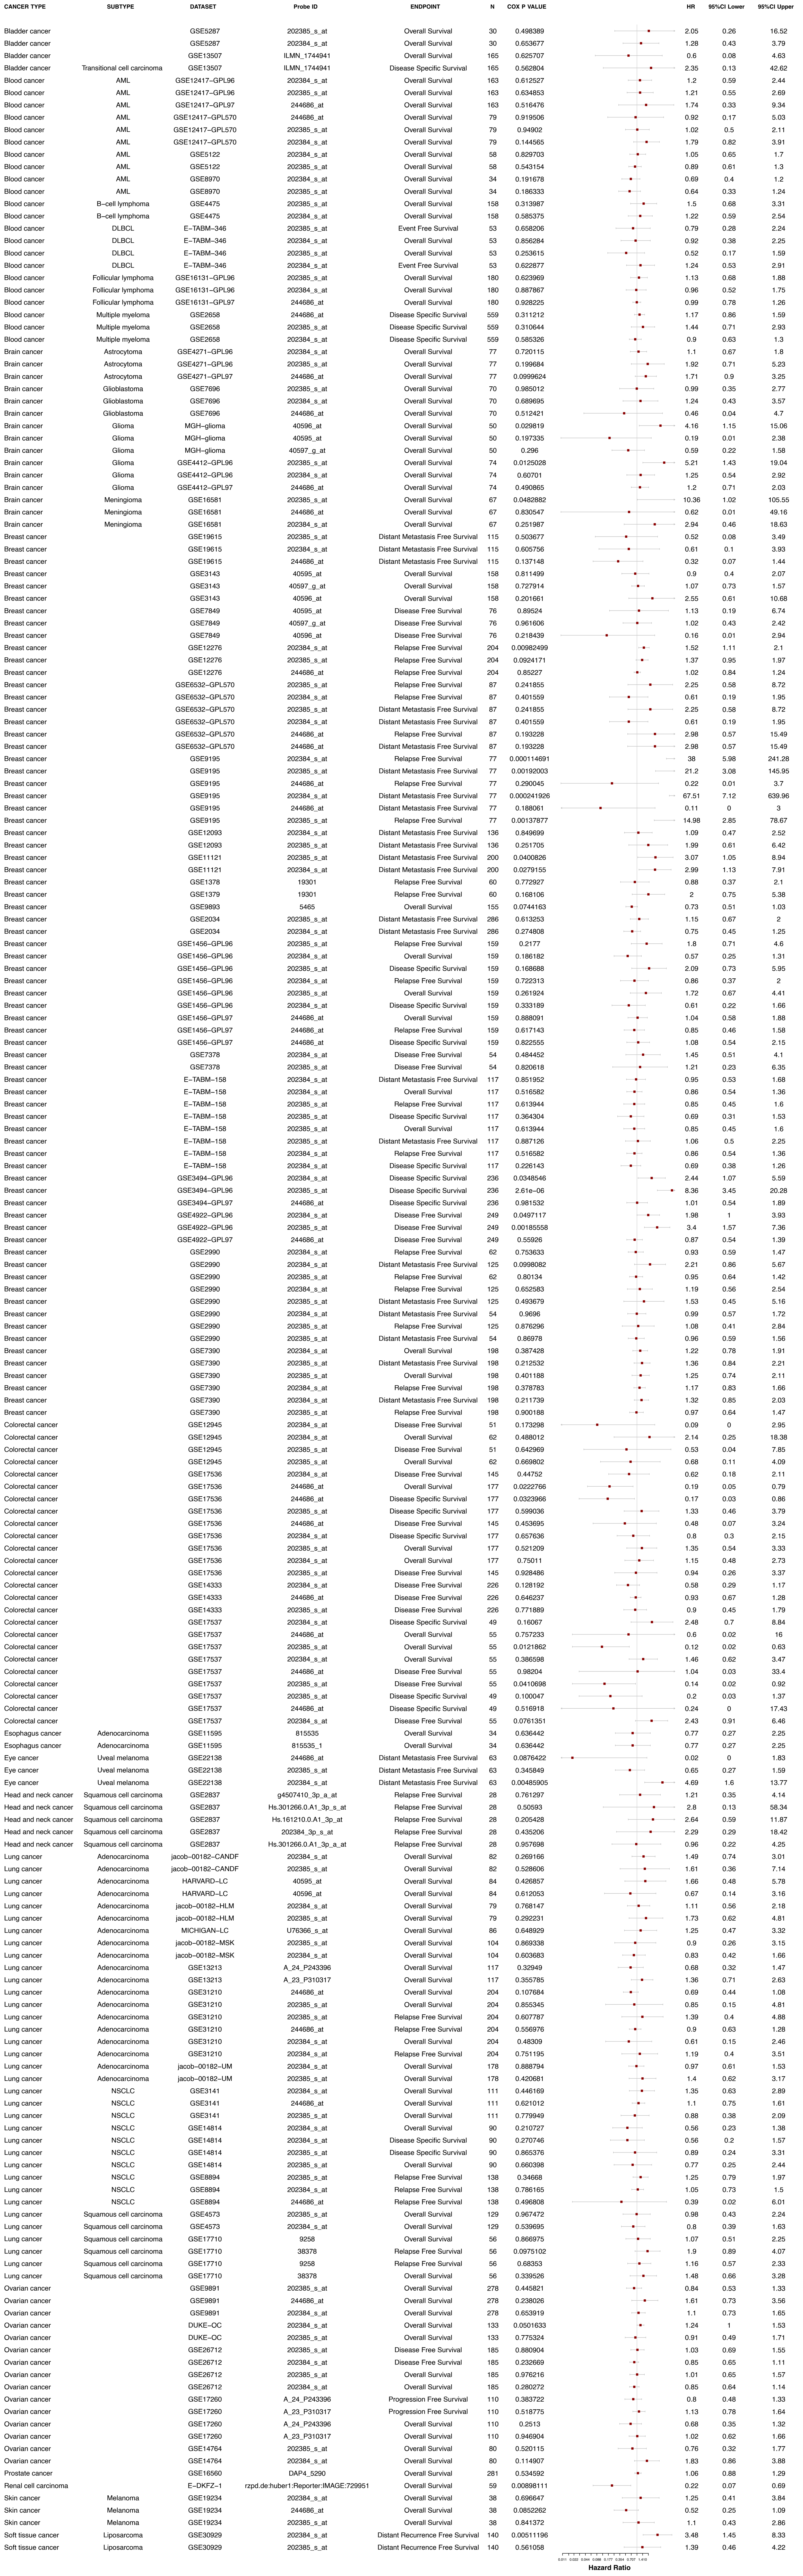

Supplement: Supplementary file [file aging-v14i2-203852-supplementary-material-SD2.pdf]
