# Supplementary material for: The oncogenic role of treacle ribosome biogenesis factor 1 (TCOF1) in human tumors: a pan-cancer analysis
Source: Aging (Albany NY). 2022 Jan 30;14(2):943–60. doi: 10.18632/aging.203852 (PMC8833134; doi:10.18632/aging.203852)
Supplement: Supplementary Table 1 [file aging-14-203852-s004.xlsx]

## Sheet: Supplementary Table 1
Supplementary Table 1. All 196 mutations of TCOF1 in TCGA studies.
Study	Sample ID	Cancer Type	Protein Change	Annotation	Functional Impact	Mutation Type	Variant Type	Copy #	COSMIC	MS	VS	Center	Chromosome	Start Pos	End Pos	Ref	Var	HGVSg	HGVSc	Allele Freq (T)	Allele Freq (N)	Variant Reads	Ref Reads	Variant Reads (Normal)	Ref Reads (Normal)	# Mut in Sample	Exon	gnomAD	ClinVar	dbSNP
Adrenocortical Carcinoma (TCGA, PanCancer Atlas)	TCGA-OR-A5K4-01	Adrenocortical Carcinoma	R667Q	OncoKB: NA;CIViC: NA;MyCancerGenome: not present;CancerHotspot: no;3DHotspot: no	MutationAssessor: impact: low, score: 1.185;SIFT: impact: tolerated, score: 0.56;Polyphen-2: impact: benign, score: 0.142	Missense_Mutation	SNP	gain		.	.	.	5	149755751	149755751	G	A	5:g.149755751G>A	ENST00000377797.3:c.2000G>A	0.53	0.0093	104	91	1	107	213	13/27
Adrenocortical Carcinoma (TCGA, PanCancer Atlas)	TCGA-PK-A5HC-01	Adrenocortical Carcinoma	A855G	OncoKB: NA;CIViC: NA;MyCancerGenome: not present;CancerHotspot: no;3DHotspot: no	MutationAssessor: impact: low, score: 1.89;SIFT: impact: deleterious, score: 0.02;Polyphen-2: impact: possibly_damaging, score: 0.655	Missense_Mutation	SNP	gain		.	.	.	5	149758877	149758877	C	G	5:g.149758877C>G	ENST00000377797.3:c.2564C>G	0.24		73	234		172	55	16/27
Bladder Urothelial Carcinoma (TCGA, PanCancer Atlas)	TCGA-4Z-AA80-01	Bladder Urothelial Carcinoma	E704Rfs*7	OncoKB: NA;CIViC: NA;MyCancerGenome: not present;CancerHotspot: no;3DHotspot: no	MutationAssessor: NA;SIFT: NA;Polyphen-2: NA	Frame_Shift_Del	DEL	diploid		.	.	.	5	149755861	149755861	G	-	5:g.149755861del	ENST00000377797.3:c.2110del	0.17		31	155		209	378	13/27
Bladder Urothelial Carcinoma (TCGA, PanCancer Atlas)	TCGA-G2-A2EO-01	Bladder Urothelial Carcinoma	E172K	OncoKB: NA;CIViC: NA;MyCancerGenome: not present;CancerHotspot: no;3DHotspot: no	MutationAssessor: impact: medium, score: 2.455;SIFT: impact: deleterious, score: 0;Polyphen-2: impact: benign, score: 0.391	Missense_Mutation	SNP	diploid	1	.	.	.	5	149748414	149748414	G	A	5:g.149748414G>A	ENST00000377797.3:c.514G>A	0.27		21	56		92	821	5/27
Bladder Urothelial Carcinoma (TCGA, PanCancer Atlas)	TCGA-GV-A3JW-01	Bladder Urothelial Carcinoma	M627I	OncoKB: NA;CIViC: NA;MyCancerGenome: not present;CancerHotspot: no;3DHotspot: no	MutationAssessor: impact: low, score: 1.795;SIFT: impact: tolerated, score: 0.33;Polyphen-2: impact: benign, score: 0.003	Missense_Mutation	SNP	shallowdel		.	.	.	5	149755460	149755460	G	C	5:g.149755460G>C	ENST00000377797.3:c.1881G>C	0.3		8	19		55	73	12/27
Bladder Urothelial Carcinoma (TCGA, PanCancer Atlas)	TCGA-FD-A6TB-01	Bladder Urothelial Carcinoma	E879K	OncoKB: NA;CIViC: NA;MyCancerGenome: not present;CancerHotspot: no;3DHotspot: no	MutationAssessor: impact: medium, score: 2.715;SIFT: impact: deleterious, score: 0.05;Polyphen-2: impact: possibly_damaging, score: 0.602	Missense_Mutation	SNP	shallowdel		.	.	.	5	149758948	149758948	G	A	5:g.149758948G>A	ENST00000377797.3:c.2635G>A	0.2		19	75		59	185	16/27
Bladder Urothelial Carcinoma (TCGA, PanCancer Atlas)	TCGA-MV-A51V-01	Bladder Urothelial Carcinoma	E546Q	OncoKB: NA;CIViC: NA;MyCancerGenome: not present;CancerHotspot: no;3DHotspot: no	MutationAssessor: impact: medium, score: 2.27;SIFT: impact: tolerated, score: 0.14;Polyphen-2: impact: benign, score: 0.178	Missense_Mutation	SNP	shallowdel		.	.	.	5	149755049	149755049	G	C	5:g.149755049G>C	ENST00000377797.3:c.1636G>C	0.08		6	65		39	1421	11/27
Bladder Urothelial Carcinoma (TCGA, PanCancer Atlas)	TCGA-ZF-A9R7-01	Bladder Urothelial Carcinoma	R288Q	OncoKB: NA;CIViC: NA;MyCancerGenome: not present;CancerHotspot: no;3DHotspot: no	MutationAssessor: impact: neutral, score: 0;SIFT: NA;Polyphen-2: NA	Missense_Mutation	SNP	shallowdel		.	.	.	5	149751792	149751792	G	A	5:g.149751792G>A	ENST00000377797.3:c.863G>A	0.64		7	4		18	636	7/27
Bladder Urothelial Carcinoma (TCGA, PanCancer Atlas)	TCGA-ZF-AA4X-01	Bladder Urothelial Carcinoma	K646N	OncoKB: NA;CIViC: NA;MyCancerGenome: not present;CancerHotspot: no;3DHotspot: no	MutationAssessor: impact: medium, score: 2.19;SIFT: impact: deleterious, score: 0.01;Polyphen-2: impact: benign, score: 0.215	Missense_Mutation	SNP	shallowdel		.	.	.	5	149755689	149755689	G	C	5:g.149755689G>C	ENST00000377797.3:c.1938G>C	0.12		17	125		203	583	13/27
Bladder Urothelial Carcinoma (TCGA, PanCancer Atlas)	TCGA-XF-A8HD-01	Bladder Urothelial Carcinoma	L1236V	OncoKB: NA;CIViC: NA;MyCancerGenome: not present;CancerHotspot: no;3DHotspot: no	MutationAssessor: impact: low, score: 1.15;SIFT: impact: tolerated, score: 0.42;Polyphen-2: impact: benign, score: 0.058	Missense_Mutation	SNP	diploid		.	.	.	5	149773037	149773037	C	G	5:g.149773037C>G	ENST00000377797.3:c.3706C>G	0.19		12	52		50	428	23/27
Brain Lower Grade Glioma (TCGA, PanCancer Atlas)	TCGA-DU-6392-01	Astrocytoma	S192L	OncoKB: NA;CIViC: NA;MyCancerGenome: not present;CancerHotspot: no;3DHotspot: no	MutationAssessor: impact: medium, score: 2.32;SIFT: impact: deleterious, score: 0;Polyphen-2: impact: possibly_damaging, score: 0.774	Missense_Mutation	SNP	diploid		.	.	.	5	149749101	149749101	C	T	5:g.149749101C>T	ENST00000377797.3:c.575C>T	0.23		11	37		58	10863	6/27
Breast Invasive Carcinoma (TCGA, PanCancer Atlas)	TCGA-A2-A0EP-01	Breast Invasive Lobular Carcinoma	RAD50-TCOF1	OncoKB: Likely Oncogenic, level NA;CIViC: NA;MyCancerGenome: not present;CancerHotspot: no;3DHotspot: no	MutationAssessor: NA;SIFT: NA;Polyphen-2: NA	fusion	FUSION	diploid				WashU	NA	-1												9
Breast Invasive Carcinoma (TCGA, PanCancer Atlas)	TCGA-AC-A23H-01	Breast Invasive Ductal Carcinoma	D1159H	OncoKB: NA;CIViC: NA;MyCancerGenome: not present;CancerHotspot: no;3DHotspot: no	MutationAssessor: impact: low, score: 1.87;SIFT: impact: deleterious, score: 0;Polyphen-2: impact: probably_damaging, score: 0.912	Missense_Mutation	SNP	diploid		.	.	.	5	149771697	149771697	G	C	5:g.149771697G>C	ENST00000377797.3:c.3475G>C	0.48		22	24		42	4260	21/27
Breast Invasive Carcinoma (TCGA, PanCancer Atlas)	TCGA-BH-A1F6-01	Breast Invasive Ductal Carcinoma	A683V	OncoKB: NA;CIViC: NA;MyCancerGenome: not present;CancerHotspot: no;3DHotspot: no	MutationAssessor: impact: medium, score: 2.125;SIFT: impact: tolerated, score: 0.16;Polyphen-2: impact: benign, score: 0.105	Missense_Mutation	SNP	shallowdel		.	.	.	5	149755799	149755799	C	T	5:g.149755799C>T	ENST00000377797.3:c.2048C>T	0.38		9	15		64	33	13/27
Breast Invasive Carcinoma (TCGA, PanCancer Atlas)	TCGA-E2-A1LG-01	Breast Invasive Lobular Carcinoma	P1304L	OncoKB: NA;CIViC: NA;MyCancerGenome: not present;CancerHotspot: no;3DHotspot: no	MutationAssessor: impact: low, score: 1.79;SIFT: impact: deleterious, score: 0;Polyphen-2: impact: benign, score: 0.294	Missense_Mutation	SNP	gain		.	.	.	5	149775971	149775971	C	T	5:g.149775971C>T	ENST00000377797.3:c.3911C>T	0.37		11	19		18	140	24/27
Breast Invasive Carcinoma (TCGA, PanCancer Atlas)	TCGA-E2-A15O-01	Breast Invasive Ductal Carcinoma	A1237V	OncoKB: NA;CIViC: NA;MyCancerGenome: not present;CancerHotspot: no;3DHotspot: no	MutationAssessor: impact: low, score: 1.445;SIFT: impact: tolerated, score: 0.08;Polyphen-2: impact: benign, score: 0.181	Missense_Mutation	SNP	diploid		.	.	.	5	149773041	149773041	C	T	5:g.149773041C>T	ENST00000377797.3:c.3710C>T	0.37		47	80		147	27	23/27
Cervical Squamous Cell Carcinoma (TCGA, PanCancer Atlas)	TCGA-C5-A2M2-01	Endocervical Adenocarcinoma	A374Pfs*119	OncoKB: NA;CIViC: NA;MyCancerGenome: not present;CancerHotspot: no;3DHotspot: no	MutationAssessor: NA;SIFT: NA;Polyphen-2: NA	Frame_Shift_Del	DEL	diploid		.	.	.	5	149754216	149754216	G	-	5:g.149754216del	ENST00000377797.3:c.1120del	0.36		10	18		21	56	9/27
Cervical Squamous Cell Carcinoma (TCGA, PanCancer Atlas)	TCGA-2W-A8YY-01	Cervical Squamous Cell Carcinoma	A69V	OncoKB: NA;CIViC: NA;MyCancerGenome: not present;CancerHotspot: no;3DHotspot: no	MutationAssessor: impact: medium, score: 2.255;SIFT: impact: deleterious, score: 0.04;Polyphen-2: impact: possibly_damaging, score: 0.866	Missense_Mutation	SNP	diploid	1	.	.	.	5	149743717	149743717	C	T	5:g.149743717C>T	ENST00000377797.3:c.206C>T	0.23		6	20		62	11306	3/27
Cervical Squamous Cell Carcinoma (TCGA, PanCancer Atlas)	TCGA-2W-A8YY-01	Cervical Squamous Cell Carcinoma	S1233F	OncoKB: NA;CIViC: NA;MyCancerGenome: not present;CancerHotspot: no;3DHotspot: no	MutationAssessor: impact: low, score: 1.905;SIFT: impact: deleterious, score: 0.02;Polyphen-2: impact: benign, score: 0.06	Missense_Mutation	SNP	diploid		.	.	.	5	149773029	149773029	C	T	5:g.149773029C>T	ENST00000377797.3:c.3698C>T	0.2		11	44		89	11306	23/27
Cervical Squamous Cell Carcinoma (TCGA, PanCancer Atlas)	TCGA-Q1-A73O-01	Cervical Squamous Cell Carcinoma	S674F	OncoKB: NA;CIViC: NA;MyCancerGenome: not present;CancerHotspot: no;3DHotspot: no	MutationAssessor: impact: medium, score: 2.485;SIFT: impact: deleterious, score: 0;Polyphen-2: impact: possibly_damaging, score: 0.487	Missense_Mutation	SNP	diploid		.	.	.	5	149755772	149755772	C	T	5:g.149755772C>T	ENST00000377797.3:c.2021C>T	0.21		6	22		28	1300	13/27
Cervical Squamous Cell Carcinoma (TCGA, PanCancer Atlas)	TCGA-IR-A3LK-01	Cervical Squamous Cell Carcinoma	R995S	OncoKB: NA;CIViC: NA;MyCancerGenome: not present;CancerHotspot: no;3DHotspot: no	MutationAssessor: impact: low, score: 1.265;SIFT: impact: tolerated, score: 0.1;Polyphen-2: impact: benign, score: 0.031	Missense_Mutation	SNP	diploid		.	.	.	5	149767590	149767590	G	C	5:g.149767590G>C	ENST00000377797.3:c.2985G>C	0.57		20	15		33	1187	18/27
Cervical Squamous Cell Carcinoma (TCGA, PanCancer Atlas)	TCGA-IR-A3LK-01	Cervical Squamous Cell Carcinoma	E1004K	OncoKB: NA;CIViC: NA;MyCancerGenome: not present;CancerHotspot: no;3DHotspot: no	MutationAssessor: impact: medium, score: 2.39;SIFT: impact: deleterious, score: 0;Polyphen-2: impact: probably_damaging, score: 0.935	Missense_Mutation	SNP	diploid		.	.	.	5	149767615	149767615	G	A	5:g.149767615G>A	ENST00000377797.3:c.3010G>A	0.38		10	16		30	1187	18/27
Cervical Squamous Cell Carcinoma (TCGA, PanCancer Atlas)	TCGA-IR-A3LK-01	Cervical Squamous Cell Carcinoma	E1056K	OncoKB: NA;CIViC: NA;MyCancerGenome: not present;CancerHotspot: no;3DHotspot: no	MutationAssessor: impact: low, score: 1.435;SIFT: impact: tolerated, score: 0.35;Polyphen-2: impact: benign, score: 0.019	Missense_Mutation	SNP	diploid		.	.	.	5	149769569	149769569	G	A	5:g.149769569G>A	ENST00000377797.3:c.3166G>A	0.44		17	22		42	1187	19/27
Cervical Squamous Cell Carcinoma (TCGA, PanCancer Atlas)	TCGA-LP-A4AV-01	Cervical Squamous Cell Carcinoma	E481K	OncoKB: NA;CIViC: NA;MyCancerGenome: not present;CancerHotspot: no;3DHotspot: no	MutationAssessor: impact: medium, score: 2.645;SIFT: impact: deleterious, score: 0.03;Polyphen-2: impact: possibly_damaging, score: 0.689	Missense_Mutation	SNP	diploid		.	.	.	5	149754679	149754679	G	A	5:g.149754679G>A	ENST00000377797.3:c.1441G>A	0.44		14	18		38	356	10/27
Cervical Squamous Cell Carcinoma (TCGA, PanCancer Atlas)	TCGA-Q1-A73P-01	Endocervical Adenocarcinoma	S1384F	OncoKB: NA;CIViC: NA;MyCancerGenome: not present;CancerHotspot: no;3DHotspot: no	MutationAssessor: impact: low, score: 1.59;SIFT: impact: deleterious, score: 0;Polyphen-2: impact: benign, score: 0.329	Missense_Mutation	SNP	diploid		.	.	.	5	149776211	149776211	C	T	5:g.149776211C>T	ENST00000377797.3:c.4151C>T	0.29		37	91		131	221	24/27
Cervical Squamous Cell Carcinoma (TCGA, PanCancer Atlas)	TCGA-C5-A7X5-01	Cervical Squamous Cell Carcinoma	E473K	OncoKB: NA;CIViC: NA;MyCancerGenome: not present;CancerHotspot: no;3DHotspot: no	MutationAssessor: impact: low, score: 1.85;SIFT: impact: tolerated, score: 0.07;Polyphen-2: impact: benign, score: 0.271	Missense_Mutation	SNP	gain		.	.	.	5	149754655	149754655	G	A	5:g.149754655G>A	ENST00000377797.3:c.1417G>A	0.2		17	67		69	195	10/27
Cervical Squamous Cell Carcinoma (TCGA, PanCancer Atlas)	TCGA-C5-A7X5-01	Cervical Squamous Cell Carcinoma	E543K	OncoKB: NA;CIViC: NA;MyCancerGenome: not present;CancerHotspot: no;3DHotspot: no	MutationAssessor: impact: low, score: 1.795;SIFT: impact: tolerated, score: 0.14;Polyphen-2: impact: benign, score: 0.178	Missense_Mutation	SNP	gain		.	.	.	5	149755040	149755040	G	A	5:g.149755040G>A	ENST00000377797.3:c.1627G>A	0.18		21	98		99	195	11/27
Cervical Squamous Cell Carcinoma (TCGA, PanCancer Atlas)	TCGA-C5-A7X5-01	Cervical Squamous Cell Carcinoma	E551K	OncoKB: NA;CIViC: NA;MyCancerGenome: not present;CancerHotspot: no;3DHotspot: no	MutationAssessor: impact: medium, score: 2.965;SIFT: impact: deleterious, score: 0.02;Polyphen-2: impact: benign, score: 0.022	Missense_Mutation	SNP	gain		.	.	.	5	149755064	149755064	G	A	5:g.149755064G>A	ENST00000377797.3:c.1651G>A	0.22		25	90		95	195	11/27
Cervical Squamous Cell Carcinoma (TCGA, PanCancer Atlas)	TCGA-C5-A8XJ-01	Cervical Squamous Cell Carcinoma	S206C	OncoKB: NA;CIViC: NA;MyCancerGenome: not present;CancerHotspot: no;3DHotspot: no	MutationAssessor: impact: low, score: 1.83;SIFT: impact: deleterious, score: 0;Polyphen-2: impact: probably_damaging, score: 0.998	Missense_Mutation	SNP	diploid		.	.	.	5	149749143	149749143	C	G	5:g.149749143C>G	ENST00000377797.3:c.617C>G	0.33		22	44		61	286	6/27
Cervical Squamous Cell Carcinoma (TCGA, PanCancer Atlas)	TCGA-VS-AA62-01	Cervical Squamous Cell Carcinoma	S365L	OncoKB: NA;CIViC: NA;MyCancerGenome: not present;CancerHotspot: no;3DHotspot: no	MutationAssessor: impact: low, score: 1.555;SIFT: impact: tolerated, score: 0.21;Polyphen-2: impact: benign, score: 0.169	Missense_Mutation	SNP	diploid		.	.	.	5	149754190	149754190	C	T	5:g.149754190C>T	ENST00000377797.3:c.1094C>T	0.24		8	26		45	90	9/27
Cervical Squamous Cell Carcinoma (TCGA, PanCancer Atlas)	TCGA-ZJ-AAXT-01	Cervical Squamous Cell Carcinoma	E691K	OncoKB: NA;CIViC: NA;MyCancerGenome: not present;CancerHotspot: no;3DHotspot: no	MutationAssessor: impact: medium, score: 2.085;SIFT: impact: tolerated, score: 0.09;Polyphen-2: impact: benign, score: 0.045	Missense_Mutation	SNP	diploid		.	.	.	5	149755822	149755822	G	A	5:g.149755822G>A	ENST00000377797.3:c.2071G>A	0.45		10	12		20	145	13/27
Cervical Squamous Cell Carcinoma (TCGA, PanCancer Atlas)	TCGA-EA-A3HS-01	Cervical Squamous Cell Carcinoma	R660*	OncoKB: NA;CIViC: NA;MyCancerGenome: not present;CancerHotspot: no;3DHotspot: no	MutationAssessor: NA;SIFT: NA;Polyphen-2: NA	Nonsense_Mutation	SNP	diploid		.	.	.	5	149755729	149755729	C	T	5:g.149755729C>T	ENST00000377797.3:c.1978C>T	0.43		13	17		28	712	13/27
Cervical Squamous Cell Carcinoma (TCGA, PanCancer Atlas)	TCGA-VS-A9UJ-01	Cervical Squamous Cell Carcinoma	G254*	OncoKB: NA;CIViC: NA;MyCancerGenome: not present;CancerHotspot: no;3DHotspot: no	MutationAssessor: NA;SIFT: NA;Polyphen-2: NA	Nonsense_Mutation	SNP	diploid		.	.	.	5	149751689	149751689	G	T	5:g.149751689G>T	ENST00000377797.3:c.760G>T	0.25		6	18		32	339	7/27
Cervical Squamous Cell Carcinoma (TCGA, PanCancer Atlas)	TCGA-VS-A94X-01	Cervical Squamous Cell Carcinoma	X1482_splice	OncoKB: NA;CIViC: NA;MyCancerGenome: not present;CancerHotspot: no;3DHotspot: no	MutationAssessor: impact: , score: undefined;SIFT: NA;Polyphen-2: NA	Splice_Site	SNP	diploid		.	.	.	5	149778584	149778584	G	C	5:g.149778584G>C	ENST00000377797.3:c.4444-1G>C	0.36		19	34		68	269
Colorectal Adenocarcinoma (TCGA, PanCancer Atlas)	TCGA-DM-A1HB-01	Colon Adenocarcinoma	S535Qfs*61	OncoKB: NA;CIViC: NA;MyCancerGenome: not present;CancerHotspot: no;3DHotspot: no	MutationAssessor: NA;SIFT: NA;Polyphen-2: NA	Frame_Shift_Del	DEL	diploid		.	.	.	5	149755011	149755011	C	-	5:g.149755011del	ENST00000377797.3:c.1602del	0.29		40	98		102	1118	11/27
Colorectal Adenocarcinoma (TCGA, PanCancer Atlas)	TCGA-AA-3833-01	Colon Adenocarcinoma	Q435Rfs*58	OncoKB: NA;CIViC: NA;MyCancerGenome: not present;CancerHotspot: no;3DHotspot: no	MutationAssessor: NA;SIFT: NA;Polyphen-2: NA	Frame_Shift_Del	DEL	diploid		.	.	.	5	149754536	149754536	C	-	5:g.149754536del	ENST00000377797.3:c.1303del	0.14		10	61		53	577	10/27
Colorectal Adenocarcinoma (TCGA, PanCancer Atlas)	TCGA-AZ-4615-01	Colon Adenocarcinoma	A618Rfs*10	OncoKB: NA;CIViC: NA;MyCancerGenome: not present;CancerHotspot: no;3DHotspot: no	MutationAssessor: NA;SIFT: NA;Polyphen-2: NA	Frame_Shift_Del	DEL	diploid		.	.	.	5	149755431	149755431	G	-	5:g.149755431del	ENST00000377797.3:c.1852del	0.13		8	52		16	833	12/27
Colorectal Adenocarcinoma (TCGA, PanCancer Atlas)	TCGA-AD-5900-01	Mucinous Adenocarcinoma of the Colon and Rectum	K1367del	OncoKB: NA;CIViC: NA;MyCancerGenome: not present;CancerHotspot: no;3DHotspot: no	MutationAssessor: NA;SIFT: NA;Polyphen-2: NA	In_Frame_Del	DEL	diploid	1	.	.	.	5	149776147	149776149	AAG	-	5:g.149776147_149776149del	ENST00000377797.3:c.4099_4101del	0.25		18	54		131	1476	24/27
Colorectal Adenocarcinoma (TCGA, PanCancer Atlas)	TCGA-AA-A01Z-01	Colon Adenocarcinoma	E1147_S1149del	OncoKB: NA;CIViC: NA;MyCancerGenome: not present;CancerHotspot: no;3DHotspot: no	MutationAssessor: NA;SIFT: NA;Polyphen-2: NA	In_Frame_Del	DEL	gain		.	.	.	5	149771655	149771663	GACAGTGAG	-	5:g.149771655_149771663del	ENST00000377797.3:c.3438_3446del	0.71		22	9		67	95	21/27
Colorectal Adenocarcinoma (TCGA, PanCancer Atlas)	TCGA-F5-6814-01	Rectal Adenocarcinoma	R1048W	OncoKB: NA;CIViC: NA;MyCancerGenome: not present;CancerHotspot: no;3DHotspot: no	MutationAssessor: impact: medium, score: 2.175;SIFT: impact: deleterious, score: 0;Polyphen-2: impact: benign, score: 0.011	Missense_Mutation	SNP	diploid		.	.	.	5	149769545	149769545	C	T	5:g.149769545C>T	ENST00000377797.3:c.3142C>T	0.46		16	19		59	9454	19/27
Colorectal Adenocarcinoma (TCGA, PanCancer Atlas)	TCGA-AA-A02R-01	Colon Adenocarcinoma	R63Q	OncoKB: NA;CIViC: NA;MyCancerGenome: not present;CancerHotspot: no;3DHotspot: no	MutationAssessor: impact: neutral, score: 0.385;SIFT: impact: tolerated, score: 0.37;Polyphen-2: impact: benign, score: 0.06	Missense_Mutation	SNP	diploid		.	.	.	5	149743699	149743699	G	A	5:g.149743699G>A	ENST00000377797.3:c.188G>A	0.31		19	43		67	1089	3/27
Colorectal Adenocarcinoma (TCGA, PanCancer Atlas)	TCGA-AZ-6598-01	Colon Adenocarcinoma	A115V	OncoKB: NA;CIViC: NA;MyCancerGenome: not present;CancerHotspot: no;3DHotspot: no	MutationAssessor: impact: neutral, score: 0.205;SIFT: impact: tolerated, score: 0.32;Polyphen-2: impact: benign, score: 0.007	Missense_Mutation	SNP	gain	1	.	.	.	5	149747446	149747446	C	T	5:g.149747446C>T	ENST00000377797.3:c.344C>T	0.24		54	173		83	2317	4/27
Colorectal Adenocarcinoma (TCGA, PanCancer Atlas)	TCGA-AG-A002-01	Rectal Adenocarcinoma	Y1207D	OncoKB: NA;CIViC: NA;MyCancerGenome: not present;CancerHotspot: no;3DHotspot: no	MutationAssessor: impact: low, score: 1.625;SIFT: impact: deleterious, score: 0;Polyphen-2: impact: possibly_damaging, score: 0.776	Missense_Mutation	SNP	diploid		.	.	.	5	149772950	149772950	T	G	5:g.149772950T>G	ENST00000377797.3:c.3619T>G	0.34		12	23		41	11431	23/27
Colorectal Adenocarcinoma (TCGA, PanCancer Atlas)	TCGA-AA-3984-01	Colon Adenocarcinoma	A657T	OncoKB: NA;CIViC: NA;MyCancerGenome: not present;CancerHotspot: no;3DHotspot: no	MutationAssessor: impact: low, score: 0.95;SIFT: impact: tolerated, score: 0.35;Polyphen-2: impact: benign, score: 0	Missense_Mutation	SNP	diploid		.	.	.	5	149755720	149755720	G	A	5:g.149755720G>A	ENST00000377797.3:c.1969G>A	0.31		46	104		148	5116	13/27
Colorectal Adenocarcinoma (TCGA, PanCancer Atlas)	TCGA-AD-5900-01	Mucinous Adenocarcinoma of the Colon and Rectum	R1348W	OncoKB: NA;CIViC: NA;MyCancerGenome: not present;CancerHotspot: no;3DHotspot: no	MutationAssessor: impact: medium, score: 2.175;SIFT: impact: deleterious, score: 0;Polyphen-2: impact: probably_damaging, score: 1	Missense_Mutation	SNP	diploid		.	.	.	5	149776102	149776102	C	T	5:g.149776102C>T	ENST00000377797.3:c.4042C>T	0.33	0.02	22	45	2	107	1476	24/27
Colorectal Adenocarcinoma (TCGA, PanCancer Atlas)	TCGA-CA-6717-01	Mucinous Adenocarcinoma of the Colon and Rectum	I955M	OncoKB: NA;CIViC: NA;MyCancerGenome: not present;CancerHotspot: no;3DHotspot: no	MutationAssessor: impact: medium, score: 2.67;SIFT: impact: deleterious, score: 0;Polyphen-2: impact: probably_damaging, score: 0.994	Missense_Mutation	SNP	diploid		.	.	.	5	149767470	149767470	T	G	5:g.149767470T>G	ENST00000377797.3:c.2865T>G	0.11		9	76		48	9586	18/27
Colorectal Adenocarcinoma (TCGA, PanCancer Atlas)	TCGA-CM-4746-01	Colon Adenocarcinoma	V179I	OncoKB: NA;CIViC: NA;MyCancerGenome: not present;CancerHotspot: no;3DHotspot: no	MutationAssessor: impact: low, score: 0.805;SIFT: impact: tolerated, score: 0.15;Polyphen-2: impact: benign, score: 0.006	Missense_Mutation	SNP	diploid	1	.	.	.	5	149748435	149748435	G	A	5:g.149748435G>A	ENST00000377797.3:c.535G>A	0.43		13	17		24	716	5/27
Colorectal Adenocarcinoma (TCGA, PanCancer Atlas)	TCGA-D5-6930-01	Mucinous Adenocarcinoma of the Colon and Rectum	S1229I	OncoKB: NA;CIViC: NA;MyCancerGenome: not present;CancerHotspot: no;3DHotspot: no	MutationAssessor: impact: low, score: 0.895;SIFT: impact: deleterious, score: 0;Polyphen-2: impact: benign, score: 0.006	Missense_Mutation	SNP	diploid		.	.	.	5	149773017	149773017	G	T	5:g.149773017G>T	ENST00000377797.3:c.3686G>T	0.18		9	40		32	1212	23/27
Colorectal Adenocarcinoma (TCGA, PanCancer Atlas)	TCGA-DM-A1DA-01	Colon Adenocarcinoma	P516T	OncoKB: NA;CIViC: NA;MyCancerGenome: not present;CancerHotspot: no;3DHotspot: no	MutationAssessor: impact: medium, score: 2.455;SIFT: impact: tolerated, score: 0.1;Polyphen-2: impact: possibly_damaging, score: 0.6	Missense_Mutation	SNP	diploid		.	.	.	5	149754959	149754959	C	A	5:g.149754959C>A	ENST00000377797.3:c.1546C>A	0.39		38	59		120	251	11/27
Colorectal Adenocarcinoma (TCGA, PanCancer Atlas)	TCGA-F4-6856-01	Mucinous Adenocarcinoma of the Colon and Rectum	A1465V	OncoKB: NA;CIViC: NA;MyCancerGenome: not present;CancerHotspot: no;3DHotspot: no	MutationAssessor: impact: low, score: 1.935;SIFT: NA;Polyphen-2: NA	Missense_Mutation	SNP	diploid		.	.	.	5	149777965	149777965	C	T	5:g.149777965C>T	ENST00000377797.3:c.4394C>T	0.27		76	209		286	961	25/27
Colorectal Adenocarcinoma (TCGA, PanCancer Atlas)	TCGA-G4-6304-01	Colon Adenocarcinoma	P1473L	OncoKB: NA;CIViC: NA;MyCancerGenome: not present;CancerHotspot: no;3DHotspot: no	MutationAssessor: impact: neutral, score: -0.345;SIFT: NA;Polyphen-2: NA	Missense_Mutation	SNP	diploid		.	.	.	5	149777989	149777989	C	T	5:g.149777989C>T	ENST00000377797.3:c.4418C>T	0.1		34	294		195	926	25/27
Colorectal Adenocarcinoma (TCGA, PanCancer Atlas)	TCGA-AA-3984-01	Colon Adenocarcinoma	R660*	OncoKB: NA;CIViC: NA;MyCancerGenome: not present;CancerHotspot: no;3DHotspot: no	MutationAssessor: NA;SIFT: NA;Polyphen-2: NA	Nonsense_Mutation	SNP	diploid		.	.	.	5	149755729	149755729	C	T	5:g.149755729C>T	ENST00000377797.3:c.1978C>T	0.32		44	92		133	5116	13/27
Esophageal Adenocarcinoma (TCGA, PanCancer Atlas)	TCGA-L5-A4OM-01	Esophageal Squamous Cell Carcinoma	E1193K	OncoKB: NA;CIViC: NA;MyCancerGenome: not present;CancerHotspot: no;3DHotspot: no	MutationAssessor: impact: low, score: 1.665;SIFT: impact: deleterious, score: 0;Polyphen-2: impact: possibly_damaging, score: 0.811	Missense_Mutation	SNP	shallowdel		.	.	.	5	149772327	149772327	G	A	5:g.149772327G>A	ENST00000377797.3:c.3577G>A	0.21		7	26		72	60	22/27
Esophageal Adenocarcinoma (TCGA, PanCancer Atlas)	TCGA-L5-A8NK-01	Esophageal Squamous Cell Carcinoma	G662C	OncoKB: NA;CIViC: NA;MyCancerGenome: not present;CancerHotspot: no;3DHotspot: no	MutationAssessor: impact: medium, score: 2.67;SIFT: impact: deleterious, score: 0;Polyphen-2: impact: probably_damaging, score: 0.912	Missense_Mutation	SNP	shallowdel		.	.	.	5	149755735	149755735	G	T	5:g.149755735G>T	ENST00000377797.3:c.1984G>T	0.23		7	23		18	173	13/27
Head and Neck Squamous Cell Carcinoma (TCGA, PanCancer Atlas)	TCGA-D6-6516-01	Head and Neck Squamous Cell Carcinoma	P675L	OncoKB: NA;CIViC: NA;MyCancerGenome: not present;CancerHotspot: no;3DHotspot: no	MutationAssessor: impact: medium, score: 1.955;SIFT: impact: deleterious, score: 0.04;Polyphen-2: impact: benign, score: 0.344	Missense_Mutation	SNP	diploid		.	.	.	5	149755775	149755775	C	T	5:g.149755775C>T	ENST00000377797.3:c.2024C>T	0.19		44	182		218	1531	13/27
Head and Neck Squamous Cell Carcinoma (TCGA, PanCancer Atlas)	TCGA-D6-6516-01	Head and Neck Squamous Cell Carcinoma	P1177S	OncoKB: NA;CIViC: NA;MyCancerGenome: not present;CancerHotspot: no;3DHotspot: no	MutationAssessor: impact: low, score: 1.75;SIFT: impact: deleterious, score: 0.04;Polyphen-2: impact: benign, score: 0.343	Missense_Mutation	SNP	diploid		.	.	.	5	149772279	149772279	C	T	5:g.149772279C>T	ENST00000377797.3:c.3529C>T	0.12		4	29		38	1531	22/27
Head and Neck Squamous Cell Carcinoma (TCGA, PanCancer Atlas)	TCGA-CV-A468-01	Head and Neck Squamous Cell Carcinoma	P916S	OncoKB: NA;CIViC: NA;MyCancerGenome: not present;CancerHotspot: no;3DHotspot: no	MutationAssessor: impact: medium, score: 1.99;SIFT: impact: tolerated, score: 0.13;Polyphen-2: impact: benign, score: 0.019	Missense_Mutation	SNP	diploid		.	.	.	5	149759182	149759182	C	T	5:g.149759182C>T	ENST00000377797.3:c.2746C>T	0.06		8	135		89	338	17/27
Head and Neck Squamous Cell Carcinoma (TCGA, PanCancer Atlas)	TCGA-F7-A624-01	Head and Neck Squamous Cell Carcinoma	Q1055R	OncoKB: NA;CIViC: NA;MyCancerGenome: not present;CancerHotspot: no;3DHotspot: no	MutationAssessor: impact: low, score: 1.91;SIFT: impact: tolerated, score: 0.06;Polyphen-2: impact: benign, score: 0.057	Missense_Mutation	SNP	diploid		.	.	.	5	149769567	149769567	A	G	5:g.149769567A>G	ENST00000377797.3:c.3164A>G	0.28		12	31		36	2744	19/27
Head and Neck Squamous Cell Carcinoma (TCGA, PanCancer Atlas)	TCGA-T2-A6X2-01	Head and Neck Squamous Cell Carcinoma	S1050L	OncoKB: NA;CIViC: NA;MyCancerGenome: not present;CancerHotspot: no;3DHotspot: no	MutationAssessor: impact: medium, score: 2.175;SIFT: impact: deleterious, score: 0.03;Polyphen-2: impact: benign, score: 0.011	Missense_Mutation	SNP	diploid		.	.	.	5	149769552	149769552	C	T	5:g.149769552C>T	ENST00000377797.3:c.3149C>T	0.31		11	25		41	322	19/27
Head and Neck Squamous Cell Carcinoma (TCGA, PanCancer Atlas)	TCGA-CQ-7071-01	Head and Neck Squamous Cell Carcinoma	D1101N	OncoKB: NA;CIViC: NA;MyCancerGenome: not present;CancerHotspot: no;3DHotspot: no	MutationAssessor: impact: medium, score: 1.995;SIFT: impact: tolerated, score: 0.06;Polyphen-2: impact: benign, score: 0.368	Missense_Mutation	SNP	diploid		.	.	.	5	149771523	149771523	G	A	5:g.149771523G>A	ENST00000377797.3:c.3301G>A	0.28		14	36		40	421	21/27
Head and Neck Squamous Cell Carcinoma (TCGA, PanCancer Atlas)	TCGA-QK-A6VB-01	Head and Neck Squamous Cell Carcinoma	A596V	OncoKB: NA;CIViC: NA;MyCancerGenome: not present;CancerHotspot: no;3DHotspot: no	MutationAssessor: impact: low, score: 1.625;SIFT: impact: deleterious, score: 0.05;Polyphen-2: impact: benign, score: 0.034	Missense_Mutation	SNP	shallowdel		.	.	.	5	149755366	149755366	C	T	5:g.149755366C>T	ENST00000377797.3:c.1787C>T	0.4		37	56		150	420	12/27
Head and Neck Squamous Cell Carcinoma (TCGA, PanCancer Atlas)	TCGA-CV-7102-01	Head and Neck Squamous Cell Carcinoma	G309W	OncoKB: NA;CIViC: NA;MyCancerGenome: not present;CancerHotspot: no;3DHotspot: no	MutationAssessor: impact: medium, score: 2.72;SIFT: impact: deleterious, score: 0;Polyphen-2: impact: probably_damaging, score: 0.996	Missense_Mutation	SNP	gain		.	.	.	5	149753791	149753791	G	T	5:g.149753791G>T	ENST00000377797.3:c.925G>T	0.13		3	21		16	169	8/27
Head and Neck Squamous Cell Carcinoma (TCGA, PanCancer Atlas)	TCGA-QK-A64Z-01	Head and Neck Squamous Cell Carcinoma	S1288*	OncoKB: NA;CIViC: NA;MyCancerGenome: not present;CancerHotspot: no;3DHotspot: no	MutationAssessor: NA;SIFT: NA;Polyphen-2: NA	Nonsense_Mutation	SNP	diploid		.	.	.	5	149775923	149775923	C	G	5:g.149775923C>G	ENST00000377797.3:c.3863C>G	0.18		21	96		140	68	24/27
Kidney Chromophobe (TCGA, PanCancer Atlas)	TCGA-KN-8426-01	Chromophobe Renal Cell Carcinoma	S1228C	OncoKB: NA;CIViC: NA;MyCancerGenome: not present;CancerHotspot: no;3DHotspot: no	MutationAssessor: impact: low, score: 1.385;SIFT: impact: tolerated, score: 0.1;Polyphen-2: impact: possibly_damaging, score: 0.634	Missense_Mutation	SNP	gain		.	.	.	5	149773014	149773014	C	G	5:g.149773014C>G	ENST00000377797.3:c.3683C>G	0.4		34	50		60	35	23/27
Kidney Renal Clear Cell Carcinoma (TCGA, PanCancer Atlas)	TCGA-B0-5713-01	Renal Clear Cell Carcinoma	K1138Qfs*4	OncoKB: NA;CIViC: NA;MyCancerGenome: not present;CancerHotspot: no;3DHotspot: no	MutationAssessor: NA;SIFT: NA;Polyphen-2: NA	Frame_Shift_Ins	INS	gain		.	.	.	5	149771631	149771632	-	C	5:g.149771631_149771632insC	ENST00000377797.3:c.3411dup	0.19		23	101		73	97	21/27
Kidney Renal Clear Cell Carcinoma (TCGA, PanCancer Atlas)	TCGA-BP-4965-01	Renal Clear Cell Carcinoma	TNIP1-TCOF1	OncoKB: Unknown, level NA;CIViC: NA;MyCancerGenome: not present;CancerHotspot: no;3DHotspot: no	MutationAssessor: NA;SIFT: NA;Polyphen-2: NA	fusion	FUSION	gain				WashU	NA	-1												49
Kidney Renal Clear Cell Carcinoma (TCGA, PanCancer Atlas)	TCGA-A3-3382-01	Renal Clear Cell Carcinoma	M190I	OncoKB: NA;CIViC: NA;MyCancerGenome: not present;CancerHotspot: no;3DHotspot: no	MutationAssessor: impact: low, score: 1.795;SIFT: impact: tolerated, score: 0.09;Polyphen-2: impact: benign, score: 0.001	Missense_Mutation	SNP	gain		.	.	.	5	149749096	149749096	G	T	5:g.149749096G>T	ENST00000377797.3:c.570G>T	0.15	0.02	20	111	1	59	89	6/27
Kidney Renal Clear Cell Carcinoma (TCGA, PanCancer Atlas)	TCGA-CJ-4899-01	Renal Clear Cell Carcinoma	R77L	OncoKB: NA;CIViC: NA;MyCancerGenome: not present;CancerHotspot: no;3DHotspot: no	MutationAssessor: impact: medium, score: 2.545;SIFT: impact: deleterious, score: 0;Polyphen-2: impact: probably_damaging, score: 0.999	Missense_Mutation	SNP	gain	2	.	.	.	5	149743741	149743741	G	T	5:g.149743741G>T	ENST00000377797.3:c.230G>T	0.16		30	156		156	37	3/27
Kidney Renal Clear Cell Carcinoma (TCGA, PanCancer Atlas)	TCGA-A3-3313-01	Renal Clear Cell Carcinoma	S1036I	OncoKB: NA;CIViC: NA;MyCancerGenome: not present;CancerHotspot: no;3DHotspot: no	MutationAssessor: impact: low, score: 1.59;SIFT: impact: deleterious, score: 0;Polyphen-2: impact: possibly_damaging, score: 0.461	Missense_Mutation	SNP	diploid		.	.	.	5	149769510	149769510	G	T	5:g.149769510G>T	ENST00000377797.3:c.3107G>T	0.43		30	40		72	95	19/27
Kidney Renal Clear Cell Carcinoma (TCGA, PanCancer Atlas)	TCGA-MW-A4EC-01	Renal Clear Cell Carcinoma	V1489A	OncoKB: NA;CIViC: NA;MyCancerGenome: not present;CancerHotspot: no;3DHotspot: no	MutationAssessor: impact: low, score: 1.67;SIFT: NA;Polyphen-2: NA	Missense_Mutation	SNP	gain		.	.	.	5	149778607	149778607	T	C	5:g.149778607T>C	ENST00000377797.3:c.4466T>C	0.22	0.0024	101	351	1	417	36	26/27
Liver Hepatocellular Carcinoma (TCGA, PanCancer Atlas)	TCGA-DD-AACE-01	Hepatocellular Carcinoma	Q821R	OncoKB: NA;CIViC: NA;MyCancerGenome: not present;CancerHotspot: no;3DHotspot: no	MutationAssessor: impact: medium, score: 2.47;SIFT: impact: tolerated, score: 0.5;Polyphen-2: impact: benign, score: 0.003	Missense_Mutation	SNP	diploid		.	.	.	5	149758589	149758589	A	G	5:g.149758589A>G	ENST00000377797.3:c.2462A>G	0.58		78	57		180	72	15/27
Lung Adenocarcinoma (TCGA, PanCancer Atlas)	TCGA-64-5781-01	Lung Adenocarcinoma	K264R	OncoKB: NA;CIViC: NA;MyCancerGenome: not present;CancerHotspot: no;3DHotspot: no	MutationAssessor: impact: low, score: 1.39;SIFT: NA;Polyphen-2: NA	Missense_Mutation	SNP	diploid		.	.	.	5	149751720	149751720	A	G	5:g.149751720A>G	ENST00000377797.3:c.791A>G	0.33		9	18		25	1023	7/27
Lung Adenocarcinoma (TCGA, PanCancer Atlas)	TCGA-49-4514-01	Lung Adenocarcinoma	Q821H	OncoKB: NA;CIViC: NA;MyCancerGenome: not present;CancerHotspot: no;3DHotspot: no	MutationAssessor: impact: medium, score: 2.47;SIFT: impact: tolerated, score: 0.19;Polyphen-2: impact: possibly_damaging, score: 0.723	Missense_Mutation	SNP	shallowdel		.	.	.	5	149758590	149758590	G	C	5:g.149758590G>C	ENST00000377797.3:c.2463G>C	0.12		10	76		86	293	15/27
Lung Adenocarcinoma (TCGA, PanCancer Atlas)	TCGA-95-7043-01	Lung Adenocarcinoma	M121L	OncoKB: NA;CIViC: NA;MyCancerGenome: not present;CancerHotspot: no;3DHotspot: no	MutationAssessor: impact: low, score: 1.59;SIFT: impact: tolerated, score: 0.13;Polyphen-2: impact: benign, score: 0	Missense_Mutation	SNP	shallowdel	1	.	.	.	5	149747463	149747463	A	C	5:g.149747463A>C	ENST00000377797.3:c.361A>C	0.77		10	3		41	1018	4/27
Lung Adenocarcinoma (TCGA, PanCancer Atlas)	TCGA-95-7947-01	Lung Adenocarcinoma	S877I	OncoKB: NA;CIViC: NA;MyCancerGenome: not present;CancerHotspot: no;3DHotspot: no	MutationAssessor: impact: medium, score: 2.72;SIFT: impact: tolerated, score: 0.09;Polyphen-2: impact: benign, score: 0.313	Missense_Mutation	SNP	diploid		.	.	.	5	149758943	149758943	G	T	5:g.149758943G>T	ENST00000377797.3:c.2630G>T	0.34		16	31		40	476	16/27
Lung Adenocarcinoma (TCGA, PanCancer Atlas)	TCGA-86-A4JF-01	Lung Adenocarcinoma	T983A	OncoKB: NA;CIViC: NA;MyCancerGenome: not present;CancerHotspot: no;3DHotspot: no	MutationAssessor: impact: neutral, score: 0.39;SIFT: impact: tolerated, score: 0.68;Polyphen-2: impact: benign, score: 0.005	Missense_Mutation	SNP	diploid		.	.	.	5	149767552	149767552	A	G	5:g.149767552A>G	ENST00000377797.3:c.2947A>G	0.23		15	49		110	1228	18/27
Lung Adenocarcinoma (TCGA, PanCancer Atlas)	TCGA-86-A4P7-01	Lung Adenocarcinoma	T147M	OncoKB: NA;CIViC: NA;MyCancerGenome: not present;CancerHotspot: no;3DHotspot: no	MutationAssessor: impact: low, score: 1.5;SIFT: impact: deleterious, score: 0.03;Polyphen-2: impact: benign, score: 0.015	Missense_Mutation	SNP	diploid		.	.	.	5	149748340	149748340	C	T	5:g.149748340C>T	ENST00000377797.3:c.440C>T	0.11		5	42		85	66	5/27
Lung Adenocarcinoma (TCGA, PanCancer Atlas)	TCGA-L9-A444-01	Lung Adenocarcinoma	A401S	OncoKB: NA;CIViC: NA;MyCancerGenome: not present;CancerHotspot: no;3DHotspot: no	MutationAssessor: impact: medium, score: 2.15;SIFT: impact: deleterious, score: 0.04;Polyphen-2: impact: benign, score: 0.303	Missense_Mutation	SNP	shallowdel		.	.	.	5	149754297	149754297	G	T	5:g.149754297G>T	ENST00000377797.3:c.1201G>T	0.28		11	29		36	493	9/27
Lung Adenocarcinoma (TCGA, PanCancer Atlas)	TCGA-NJ-A4YF-01	Lung Adenocarcinoma	P240S	OncoKB: NA;CIViC: NA;MyCancerGenome: not present;CancerHotspot: no;3DHotspot: no	MutationAssessor: impact: low, score: 1.445;SIFT: NA;Polyphen-2: NA	Missense_Mutation	SNP	gain		.	.	.	5	149751647	149751647	C	T	5:g.149751647C>T	ENST00000377797.3:c.718C>T	0.1		6	55		44	547	7/27
Lung Adenocarcinoma (TCGA, PanCancer Atlas)	TCGA-86-6851-01	Lung Adenocarcinoma	G321W	OncoKB: NA;CIViC: NA;MyCancerGenome: not present;CancerHotspot: no;3DHotspot: no	MutationAssessor: impact: medium, score: 3.125;SIFT: impact: deleterious, score: 0;Polyphen-2: impact: probably_damaging, score: 0.924	Missense_Mutation	SNP	shallowdel		.	.	.	5	149753827	149753827	G	T	5:g.149753827G>T	ENST00000377797.3:c.961G>T	0.46		6	7		12	839	8/27
Lung Adenocarcinoma (TCGA, PanCancer Atlas)	TCGA-67-3771-01	Lung Adenocarcinoma	G189=	OncoKB: NA;CIViC: NA;MyCancerGenome: not present;CancerHotspot: no;3DHotspot: no	MutationAssessor: NA;SIFT: NA;Polyphen-2: NA	Splice_Region	SNP	shallowdel		.	.	.	5	149749093	149749093	G	A	5:g.149749093G>A	ENST00000377797.3:c.567G>A	0.29		18	45		157	951	6/27
Lung Squamous Cell Carcinoma (TCGA, PanCancer Atlas)	TCGA-34-5928-01	Lung Squamous Cell Carcinoma	K264N	OncoKB: NA;CIViC: NA;MyCancerGenome: not present;CancerHotspot: no;3DHotspot: no	MutationAssessor: impact: medium, score: 2.28;SIFT: NA;Polyphen-2: NA	Missense_Mutation	SNP	diploid		.	.	.	5	149751721	149751721	G	T	5:g.149751721G>T	ENST00000377797.3:c.792G>T	0.19		9	39		43	320	7/27
Lung Squamous Cell Carcinoma (TCGA, PanCancer Atlas)	TCGA-34-5928-01	Lung Squamous Cell Carcinoma	E267K	OncoKB: NA;CIViC: NA;MyCancerGenome: not present;CancerHotspot: no;3DHotspot: no	MutationAssessor: impact: low, score: 1.6;SIFT: NA;Polyphen-2: NA	Missense_Mutation	SNP	diploid		.	.	.	5	149751728	149751728	G	A	5:g.149751728G>A	ENST00000377797.3:c.799G>A	0.14		6	36		41	320	7/27
Lung Squamous Cell Carcinoma (TCGA, PanCancer Atlas)	TCGA-43-2578-01	Lung Squamous Cell Carcinoma	K379M	OncoKB: NA;CIViC: NA;MyCancerGenome: not present;CancerHotspot: no;3DHotspot: no	MutationAssessor: impact: medium, score: 2.895;SIFT: impact: deleterious, score: 0.02;Polyphen-2: impact: probably_damaging, score: 0.994	Missense_Mutation	SNP	shallowdel		.	.	.	5	149754232	149754232	A	T	5:g.149754232A>T	ENST00000377797.3:c.1136A>T	0.3		18	43		119	294	9/27
Lung Squamous Cell Carcinoma (TCGA, PanCancer Atlas)	TCGA-63-6202-01	Lung Squamous Cell Carcinoma	E1193K	OncoKB: NA;CIViC: NA;MyCancerGenome: not present;CancerHotspot: no;3DHotspot: no	MutationAssessor: impact: low, score: 1.665;SIFT: impact: deleterious, score: 0;Polyphen-2: impact: possibly_damaging, score: 0.811	Missense_Mutation	SNP	shallowdel		.	.	.	5	149772327	149772327	G	A	5:g.149772327G>A	ENST00000377797.3:c.3577G>A	0.36		15	27		31	328	22/27
Lung Squamous Cell Carcinoma (TCGA, PanCancer Atlas)	TCGA-70-6723-01	Lung Squamous Cell Carcinoma	V44L	OncoKB: NA;CIViC: NA;MyCancerGenome: not present;CancerHotspot: no;3DHotspot: no	MutationAssessor: impact: medium, score: 2.25;SIFT: impact: deleterious, score: 0.01;Polyphen-2: impact: possibly_damaging, score: 0.597	Missense_Mutation	SNP	shallowdel	1	.	.	.	5	149740740	149740740	G	T	5:g.149740740G>T	ENST00000377797.3:c.130G>T	0.44		34	43		96	105	2/27
Lung Squamous Cell Carcinoma (TCGA, PanCancer Atlas)	TCGA-58-A46L-01	Lung Squamous Cell Carcinoma	T147S	OncoKB: NA;CIViC: NA;MyCancerGenome: not present;CancerHotspot: no;3DHotspot: no	MutationAssessor: impact: low, score: 1.5;SIFT: impact: tolerated, score: 0.08;Polyphen-2: impact: benign, score: 0.006	Missense_Mutation	SNP	shallowdel		.	.	.	5	149748339	149748339	A	T	5:g.149748339A>T	ENST00000377797.3:c.439A>T	0.37		19	33		87	214	5/27
Lung Squamous Cell Carcinoma (TCGA, PanCancer Atlas)	TCGA-85-7844-01	Lung Squamous Cell Carcinoma	A1166T	OncoKB: NA;CIViC: NA;MyCancerGenome: not present;CancerHotspot: no;3DHotspot: no	MutationAssessor: impact: low, score: 0.955;SIFT: impact: tolerated, score: 0.22;Polyphen-2: impact: benign, score: 0.046	Missense_Mutation	SNP	diploid		.	.	.	5	149771718	149771718	G	A	5:g.149771718G>A	ENST00000377797.3:c.3496G>A	0.09		4	39		61	157	21/27
Lung Squamous Cell Carcinoma (TCGA, PanCancer Atlas)	TCGA-90-A4ED-01	Lung Squamous Cell Carcinoma	S1233F	OncoKB: NA;CIViC: NA;MyCancerGenome: not present;CancerHotspot: no;3DHotspot: no	MutationAssessor: impact: low, score: 1.905;SIFT: impact: deleterious, score: 0.02;Polyphen-2: impact: benign, score: 0.06	Missense_Mutation	SNP	diploid		.	.	.	5	149773029	149773029	C	T	5:g.149773029C>T	ENST00000377797.3:c.3698C>T	0.46		42	50		92	1591	23/27
Ovarian Serous Cystadenocarcinoma (TCGA, PanCancer Atlas)	TCGA-24-1104-01	Serous Ovarian Cancer	G1121R	OncoKB: NA;CIViC: NA;MyCancerGenome: not present;CancerHotspot: no;3DHotspot: no	MutationAssessor: impact: low, score: 0.895;SIFT: impact: tolerated, score: 0.07;Polyphen-2: impact: possibly_damaging, score: 0.563	Missense_Mutation	SNP	gain		.	.	.	5	149771583	149771583	G	A	5:g.149771583G>A	ENST00000377797.3:c.3361G>A	0.2		20	80		39	88	21/27
Ovarian Serous Cystadenocarcinoma (TCGA, PanCancer Atlas)	TCGA-13-1404-01	Serous Ovarian Cancer	K928T	OncoKB: NA;CIViC: NA;MyCancerGenome: not present;CancerHotspot: no;3DHotspot: no	MutationAssessor: impact: low, score: 1.795;SIFT: impact: tolerated, score: 0.06;Polyphen-2: impact: possibly_damaging, score: 0.572	Missense_Mutation	SNP	diploid		.	.	.	5	149759219	149759219	A	C	5:g.149759219A>C	ENST00000377797.3:c.2783A>C	0.09		4	40		47	57	17/27
Ovarian Serous Cystadenocarcinoma (TCGA, PanCancer Atlas)	TCGA-04-1331-01	Serous Ovarian Cancer	X291_splice	OncoKB: NA;CIViC: NA;MyCancerGenome: not present;CancerHotspot: no;3DHotspot: no	MutationAssessor: impact: , score: undefined;SIFT: NA;Polyphen-2: NA	Splice_Site	SNP	shallowdel		.	.	.	5	149753735	149753735	A	C	5:g.149753735A>C	ENST00000377797.3:c.871-2A>C	0.42		8	11		12	135
Prostate Adenocarcinoma (TCGA, PanCancer Atlas)	TCGA-FC-7708-01	Prostate Adenocarcinoma	S477N	OncoKB: NA;CIViC: NA;MyCancerGenome: not present;CancerHotspot: no;3DHotspot: no	MutationAssessor: impact: medium, score: 2.765;SIFT: impact: deleterious, score: 0.03;Polyphen-2: impact: possibly_damaging, score: 0.484	Missense_Mutation	SNP	diploid		.	.	.	5	149754668	149754668	G	A	5:g.149754668G>A	ENST00000377797.3:c.1430G>A	0.11		4	32		55	26	10/27
Sarcoma (TCGA, PanCancer Atlas)	TCGA-3B-A9HT-01	Leiomyosarcoma	G1016A	OncoKB: NA;CIViC: NA;MyCancerGenome: not present;CancerHotspot: no;3DHotspot: no	MutationAssessor: impact: neutral, score: -2.33;SIFT: impact: tolerated, score: 1;Polyphen-2: impact: benign, score: 0	Missense_Mutation	SNP	gain		.	.	.	5	149769450	149769450	G	C	5:g.149769450G>C	ENST00000377797.3:c.3047G>C	0.2		12	47		30	300	19/27
Sarcoma (TCGA, PanCancer Atlas)	TCGA-IE-A6BZ-01	Undifferentiated Pleomorphic Sarcoma/Malignant Fibrous Histiocytoma/High-Grade Spindle Cell Sarcoma	A115V	OncoKB: NA;CIViC: NA;MyCancerGenome: not present;CancerHotspot: no;3DHotspot: no	MutationAssessor: impact: neutral, score: 0.205;SIFT: impact: tolerated, score: 0.32;Polyphen-2: impact: benign, score: 0.007	Missense_Mutation	SNP	shallowdel	1	.	.	.	5	149747446	149747446	C	T	5:g.149747446C>T	ENST00000377797.3:c.344C>T	0.43		25	33		85	41	4/27
Skin Cutaneous Melanoma (TCGA, PanCancer Atlas)	TCGA-D9-A6EC-06	Cutaneous Melanoma	P1437L	OncoKB: NA;CIViC: NA;MyCancerGenome: not present;CancerHotspot: no;3DHotspot: no	MutationAssessor: impact: low, score: 1.245;SIFT: impact: tolerated, score: 0.06;Polyphen-2: impact: benign, score: 0.018	Missense_Mutation	SNP	shallowdel		.	.	.	5	149776370	149776370	C	T	5:g.149776370C>T	ENST00000377797.3:c.4310C>T	0.38		3	5		13	3676	24/27
Skin Cutaneous Melanoma (TCGA, PanCancer Atlas)	TCGA-EB-A431-01	Cutaneous Melanoma	P1177S	OncoKB: NA;CIViC: NA;MyCancerGenome: not present;CancerHotspot: no;3DHotspot: no	MutationAssessor: impact: low, score: 1.75;SIFT: impact: deleterious, score: 0.04;Polyphen-2: impact: benign, score: 0.343	Missense_Mutation	SNP			.	.	.	5	149772279	149772279	C	T	5:g.149772279C>T	ENST00000377797.3:c.3529C>T	0.13		6	40		25	1397	22/27
Skin Cutaneous Melanoma (TCGA, PanCancer Atlas)	TCGA-FS-A4F5-06	Cutaneous Melanoma	P1177S	OncoKB: NA;CIViC: NA;MyCancerGenome: not present;CancerHotspot: no;3DHotspot: no	MutationAssessor: impact: low, score: 1.75;SIFT: impact: deleterious, score: 0.04;Polyphen-2: impact: benign, score: 0.343	Missense_Mutation	SNP	shallowdel		.	.	.	5	149772279	149772279	C	T	5:g.149772279C>T	ENST00000377797.3:c.3529C>T	0.76		16	5		21	647	22/27
Skin Cutaneous Melanoma (TCGA, PanCancer Atlas)	TCGA-EE-A2A5-06	Cutaneous Melanoma	T168M	OncoKB: NA;CIViC: NA;MyCancerGenome: not present;CancerHotspot: no;3DHotspot: no	MutationAssessor: impact: low, score: 1.39;SIFT: impact: deleterious, score: 0.01;Polyphen-2: impact: benign, score: 0.402	Missense_Mutation	SNP	diploid	1	.	.	.	5	149748403	149748403	C	T	5:g.149748403C>T	ENST00000377797.3:c.503C>T	0.74	0.01	31	11	1	67	472	5/27
Skin Cutaneous Melanoma (TCGA, PanCancer Atlas)	TCGA-EE-A181-06	Cutaneous Melanoma	T648I	OncoKB: NA;CIViC: NA;MyCancerGenome: not present;CancerHotspot: no;3DHotspot: no	MutationAssessor: impact: low, score: 1.445;SIFT: impact: tolerated, score: 0.09;Polyphen-2: impact: benign, score: 0.037	Missense_Mutation	SNP	diploid		.	.	.	5	149755694	149755694	C	T	5:g.149755694C>T	ENST00000377797.3:c.1943C>T	0.24		27	86		209	4527	13/27
Skin Cutaneous Melanoma (TCGA, PanCancer Atlas)	TCGA-EE-A29T-06	Cutaneous Melanoma	S990L	OncoKB: NA;CIViC: NA;MyCancerGenome: not present;CancerHotspot: no;3DHotspot: no	MutationAssessor: impact: neutral, score: 0.77;SIFT: impact: tolerated, score: 0.1;Polyphen-2: impact: benign, score: 0.029	Missense_Mutation	SNP	gain		.	.	.	5	149767574	149767574	C	T	5:g.149767574C>T	ENST00000377797.3:c.2969C>T	0.16		22	119		77	326	18/27
Skin Cutaneous Melanoma (TCGA, PanCancer Atlas)	TCGA-EE-A2MD-06	Cutaneous Melanoma	S381F	OncoKB: NA;CIViC: NA;MyCancerGenome: not present;CancerHotspot: no;3DHotspot: no	MutationAssessor: impact: medium, score: 2.72;SIFT: impact: deleterious, score: 0;Polyphen-2: impact: possibly_damaging, score: 0.731	Missense_Mutation	SNP	diploid		.	.	.	5	149754238	149754238	C	T	5:g.149754238C>T	ENST00000377797.3:c.1142C>T	0.21		11	41		72	2177	9/27
Skin Cutaneous Melanoma (TCGA, PanCancer Atlas)	TCGA-EE-A3AG-06	Cutaneous Melanoma	S381F	OncoKB: NA;CIViC: NA;MyCancerGenome: not present;CancerHotspot: no;3DHotspot: no	MutationAssessor: impact: medium, score: 2.72;SIFT: impact: deleterious, score: 0;Polyphen-2: impact: possibly_damaging, score: 0.731	Missense_Mutation	SNP	diploid		.	.	.	5	149754238	149754238	C	T	5:g.149754238C>T	ENST00000377797.3:c.1142C>T	0.25		14	41		53	1956	9/27
Skin Cutaneous Melanoma (TCGA, PanCancer Atlas)	TCGA-D9-A1JX-06	Cutaneous Melanoma	P1108S	OncoKB: NA;CIViC: NA;MyCancerGenome: not present;CancerHotspot: no;3DHotspot: no	MutationAssessor: impact: low, score: 1.465;SIFT: impact: tolerated, score: 0.11;Polyphen-2: impact: benign, score: 0.324	Missense_Mutation	SNP	shallowdel		.	.	.	5	149771544	149771544	C	T	5:g.149771544C>T	ENST00000377797.3:c.3322C>T	0.7		16	7		41	194	21/27
Skin Cutaneous Melanoma (TCGA, PanCancer Atlas)	TCGA-EE-A180-06	Cutaneous Melanoma	E937K	OncoKB: NA;CIViC: NA;MyCancerGenome: not present;CancerHotspot: no;3DHotspot: no	MutationAssessor: impact: medium, score: 2.67;SIFT: impact: tolerated, score: 0.17;Polyphen-2: impact: possibly_damaging, score: 0.854	Missense_Mutation	SNP	shallowdel		.	.	.	5	149759245	149759245	G	A	5:g.149759245G>A	ENST00000377797.3:c.2809G>A	0.48		30	33		63	446	17/27
Skin Cutaneous Melanoma (TCGA, PanCancer Atlas)	TCGA-D9-A6EC-06	Cutaneous Melanoma	S328F	OncoKB: NA;CIViC: NA;MyCancerGenome: not present;CancerHotspot: no;3DHotspot: no	MutationAssessor: impact: neutral, score: 0.69;SIFT: impact: tolerated, score: 0.08;Polyphen-2: impact: benign, score: 0	Missense_Mutation	SNP	shallowdel		.	.	.	5	149753849	149753849	C	T	5:g.149753849C>T	ENST00000377797.3:c.983C>T	0.56		5	4		14	3676	8/27
Skin Cutaneous Melanoma (TCGA, PanCancer Atlas)	TCGA-EE-A183-06	Cutaneous Melanoma	A536V	OncoKB: NA;CIViC: NA;MyCancerGenome: not present;CancerHotspot: no;3DHotspot: no	MutationAssessor: impact: low, score: 1.69;SIFT: impact: tolerated, score: 0.28;Polyphen-2: impact: benign, score: 0.005	Missense_Mutation	SNP	diploid		.	.	.	5	149755020	149755020	C	T	5:g.149755020C>T	ENST00000377797.3:c.1607C>T	0.15		6	35		63	2156	11/27
Skin Cutaneous Melanoma (TCGA, PanCancer Atlas)	TCGA-FS-A1ZC-06	Cutaneous Melanoma	S620N	OncoKB: NA;CIViC: NA;MyCancerGenome: not present;CancerHotspot: no;3DHotspot: no	MutationAssessor: impact: neutral, score: 0.345;SIFT: impact: deleterious, score: 0.02;Polyphen-2: impact: benign, score: 0.383	Missense_Mutation	SNP	shallowdel		.	.	.	5	149755438	149755438	G	A	5:g.149755438G>A	ENST00000377797.3:c.1859G>A	0.52		17	16		32	751	12/27
Skin Cutaneous Melanoma (TCGA, PanCancer Atlas)	TCGA-FW-A3R5-06	Cutaneous Melanoma	P319L	OncoKB: NA;CIViC: NA;MyCancerGenome: not present;CancerHotspot: no;3DHotspot: no	MutationAssessor: impact: low, score: 0.95;SIFT: impact: deleterious, score: 0.04;Polyphen-2: impact: benign, score: 0.003	Missense_Mutation	SNP	diploid		.	.	.	5	149753822	149753822	C	T	5:g.149753822C>T	ENST00000377797.3:c.956C>T	0.24		4	13		29	15825	8/27
Skin Cutaneous Melanoma (TCGA, PanCancer Atlas)	TCGA-EE-A2A1-06	Cutaneous Melanoma	E89K	OncoKB: NA;CIViC: NA;MyCancerGenome: not present;CancerHotspot: no;3DHotspot: no	MutationAssessor: impact: medium, score: 2.25;SIFT: impact: deleterious, score: 0;Polyphen-2: impact: possibly_damaging, score: 0.904	Missense_Mutation	SNP	diploid	1	.	.	.	5	149743776	149743776	G	A	5:g.149743776G>A	ENST00000377797.3:c.265G>A	0.12		9	64		49	340	3/27
Skin Cutaneous Melanoma (TCGA, PanCancer Atlas)	TCGA-GN-A26C-01	Cutaneous Melanoma	A1119V	OncoKB: NA;CIViC: NA;MyCancerGenome: not present;CancerHotspot: no;3DHotspot: no	MutationAssessor: impact: low, score: 1.265;SIFT: impact: tolerated, score: 0.07;Polyphen-2: impact: benign, score: 0.037	Missense_Mutation	SNP			.	.	.	5	149771578	149771578	C	T	5:g.149771578C>T	ENST00000377797.3:c.3356C>T	0.18		8	36		20	2464	21/27
Skin Cutaneous Melanoma (TCGA, PanCancer Atlas)	TCGA-EE-A29M-06	Cutaneous Melanoma	S1275F	OncoKB: NA;CIViC: NA;MyCancerGenome: not present;CancerHotspot: no;3DHotspot: no	MutationAssessor: impact: neutral, score: 0.69;SIFT: impact: deleterious, score: 0;Polyphen-2: impact: possibly_damaging, score: 0.562	Missense_Mutation	SNP	shallowdel		.	.	.	5	149775884	149775884	C	T	5:g.149775884C>T	ENST00000377797.3:c.3824C>T	0.37		51	86		104	1965	24/27
Skin Cutaneous Melanoma (TCGA, PanCancer Atlas)	TCGA-BF-A1PU-01	Cutaneous Melanoma	P1033H	OncoKB: NA;CIViC: NA;MyCancerGenome: not present;CancerHotspot: no;3DHotspot: no	MutationAssessor: impact: low, score: 1.445;SIFT: impact: deleterious, score: 0.01;Polyphen-2: impact: benign, score: 0.011	Missense_Mutation	SNP			.	.	.	5	149769501	149769501	C	A	5:g.149769501C>A	ENST00000377797.3:c.3098C>A	0.12		4	29		36	1436	19/27
Skin Cutaneous Melanoma (TCGA, PanCancer Atlas)	TCGA-BF-A1PV-01	Cutaneous Melanoma	P566Q	OncoKB: NA;CIViC: NA;MyCancerGenome: not present;CancerHotspot: no;3DHotspot: no	MutationAssessor: impact: low, score: 1.8;SIFT: impact: tolerated, score: 0.09;Polyphen-2: impact: benign, score: 0.018	Missense_Mutation	SNP			.	.	.	5	149755110	149755110	C	A	5:g.149755110C>A	ENST00000377797.3:c.1697C>A	0.09		3	31		25	253	11/27
Skin Cutaneous Melanoma (TCGA, PanCancer Atlas)	TCGA-BF-A1Q0-01	Cutaneous Melanoma	K1318N	OncoKB: NA;CIViC: NA;MyCancerGenome: not present;CancerHotspot: no;3DHotspot: no	MutationAssessor: impact: low, score: 1.935;SIFT: impact: deleterious, score: 0;Polyphen-2: impact: probably_damaging, score: 0.993	Missense_Mutation	SNP			.	.	.	5	149776014	149776014	G	T	5:g.149776014G>T	ENST00000377797.3:c.3954G>T	0.09		3	32		49	2630	24/27
Skin Cutaneous Melanoma (TCGA, PanCancer Atlas)	TCGA-EB-A1NK-01	Cutaneous Melanoma	P391H	OncoKB: NA;CIViC: NA;MyCancerGenome: not present;CancerHotspot: no;3DHotspot: no	MutationAssessor: impact: medium, score: 2.455;SIFT: impact: deleterious, score: 0;Polyphen-2: impact: probably_damaging, score: 0.982	Missense_Mutation	SNP			.	.	.	5	149754268	149754268	C	A	5:g.149754268C>A	ENST00000377797.3:c.1172C>A	0.09		3	32		29	300	9/27
Skin Cutaneous Melanoma (TCGA, PanCancer Atlas)	TCGA-EB-A1NK-01	Cutaneous Melanoma	K1424N	OncoKB: NA;CIViC: NA;MyCancerGenome: not present;CancerHotspot: no;3DHotspot: no	MutationAssessor: impact: low, score: 1.1;SIFT: impact: tolerated, score: 0.18;Polyphen-2: impact: possibly_damaging, score: 0.607	Missense_Mutation	SNP			.	.	.	5	149776332	149776332	G	T	5:g.149776332G>T	ENST00000377797.3:c.4272G>T	0.09		3	31		13	300	24/27
Skin Cutaneous Melanoma (TCGA, PanCancer Atlas)	TCGA-EE-A2GK-06	Cutaneous Melanoma	S477R	OncoKB: NA;CIViC: NA;MyCancerGenome: not present;CancerHotspot: no;3DHotspot: no	MutationAssessor: impact: medium, score: 2.765;SIFT: impact: deleterious, score: 0;Polyphen-2: impact: possibly_damaging, score: 0.682	Missense_Mutation	SNP	diploid		.	.	.	5	149754669	149754669	C	A	5:g.149754669C>A	ENST00000377797.3:c.1431C>A	0.12		4	30		28	410	10/27
Skin Cutaneous Melanoma (TCGA, PanCancer Atlas)	TCGA-EE-A2MS-06	Cutaneous Melanoma	S1200F	OncoKB: NA;CIViC: NA;MyCancerGenome: not present;CancerHotspot: no;3DHotspot: no	MutationAssessor: impact: low, score: 1.935;SIFT: impact: deleterious, score: 0;Polyphen-2: impact: probably_damaging, score: 0.999	Missense_Mutation	SNP	gain		.	.	.	5	149772349	149772349	C	T	5:g.149772349C>T	ENST00000377797.3:c.3599C>T	0.1		3	27		34	2462	22/27
Skin Cutaneous Melanoma (TCGA, PanCancer Atlas)	TCGA-ER-A19B-06	Cutaneous Melanoma	P1259H	OncoKB: NA;CIViC: NA;MyCancerGenome: not present;CancerHotspot: no;3DHotspot: no	MutationAssessor: impact: low, score: 1.87;SIFT: impact: deleterious, score: 0.01;Polyphen-2: impact: possibly_damaging, score: 0.906	Missense_Mutation	SNP	shallowdel		.	.	.	5	149773107	149773107	C	A	5:g.149773107C>A	ENST00000377797.3:c.3776C>A	0.15		4	22		21	1521	23/27
Skin Cutaneous Melanoma (TCGA, PanCancer Atlas)	TCGA-FS-A1YX-06	Cutaneous Melanoma	P103T	OncoKB: NA;CIViC: NA;MyCancerGenome: not present;CancerHotspot: no;3DHotspot: no	MutationAssessor: impact: medium, score: 2.455;SIFT: impact: deleterious, score: 0;Polyphen-2: impact: probably_damaging, score: 0.961	Missense_Mutation	SNP	shallowdel		.	.	.	5	149747409	149747409	C	A	5:g.149747409C>A	ENST00000377797.3:c.307C>A	0.08		3	33		52	50	4/27
Skin Cutaneous Melanoma (TCGA, PanCancer Atlas)	TCGA-FS-A1Z0-06	Cutaneous Melanoma	G1121W	OncoKB: NA;CIViC: NA;MyCancerGenome: not present;CancerHotspot: no;3DHotspot: no	MutationAssessor: impact: low, score: 0.895;SIFT: impact: deleterious, score: 0.01;Polyphen-2: impact: possibly_damaging, score: 0.794	Missense_Mutation	SNP	diploid		.	.	.	5	149771583	149771583	G	T	5:g.149771583G>T	ENST00000377797.3:c.3361G>T	0.13		3	20		49	1066	21/27
Skin Cutaneous Melanoma (TCGA, PanCancer Atlas)	TCGA-W3-AA1R-06	Cutaneous Melanoma	S207R	OncoKB: NA;CIViC: NA;MyCancerGenome: not present;CancerHotspot: no;3DHotspot: no	MutationAssessor: impact: low, score: 1.83;SIFT: impact: deleterious, score: 0.01;Polyphen-2: impact: probably_damaging, score: 0.998	Missense_Mutation	SNP	shallowdel		.	.	.	5	149749147	149749147	T	G	5:g.149749147T>G	ENST00000377797.3:c.621T>G	0.61		17	11		32	1461	6/27
Skin Cutaneous Melanoma (TCGA, PanCancer Atlas)	TCGA-FS-A1ZC-06	Cutaneous Melanoma	Q299*	OncoKB: NA;CIViC: NA;MyCancerGenome: not present;CancerHotspot: no;3DHotspot: no	MutationAssessor: NA;SIFT: NA;Polyphen-2: NA	Nonsense_Mutation	SNP	shallowdel		.	.	.	5	149753761	149753761	C	T	5:g.149753761C>T	ENST00000377797.3:c.895C>T	0.44		4	5		12	751	8/27
Skin Cutaneous Melanoma (TCGA, PanCancer Atlas)	TCGA-DA-A1I7-06	Cutaneous Melanoma	S226*	OncoKB: NA;CIViC: NA;MyCancerGenome: not present;CancerHotspot: no;3DHotspot: no	MutationAssessor: NA;SIFT: NA;Polyphen-2: NA	Nonsense_Mutation	SNP	shallowdel		.	.	.	5	149751606	149751606	C	A	5:g.149751606C>A	ENST00000377797.3:c.677C>A	0.11		4	33		36	846	7/27
Skin Cutaneous Melanoma (TCGA, PanCancer Atlas)	TCGA-EE-A3AC-06	Cutaneous Melanoma	G366*	OncoKB: NA;CIViC: NA;MyCancerGenome: not present;CancerHotspot: no;3DHotspot: no	MutationAssessor: NA;SIFT: NA;Polyphen-2: NA	Nonsense_Mutation	SNP	diploid		.	.	.	5	149754192	149754192	G	T	5:g.149754192G>T	ENST00000377797.3:c.1096G>T	0.1		5	47		77	1865	9/27
Skin Cutaneous Melanoma (TCGA, PanCancer Atlas)	TCGA-D9-A148-06	Cutaneous Melanoma	X214_splice	OncoKB: NA;CIViC: NA;MyCancerGenome: not present;CancerHotspot: no;3DHotspot: no	MutationAssessor: impact: , score: undefined;SIFT: NA;Polyphen-2: NA	Splice_Site	SNP	gain		.	.	.	5	149751568	149751568	G	T	5:g.149751568G>T	ENST00000377797.3:c.640-1G>T	0.15		5	28		30	843
Stomach Adenocarcinoma (TCGA, PanCancer Atlas)	TCGA-BR-4184-01	Stomach Adenocarcinoma	K1464Rfs*112	OncoKB: NA;CIViC: NA;MyCancerGenome: not present;CancerHotspot: no;3DHotspot: no	MutationAssessor: NA;SIFT: NA;Polyphen-2: NA	Frame_Shift_Del	DEL	diploid		.	.	.	5	149777957	149777957	A	-	5:g.149777957del	ENST00000377797.3:c.4391del	0.21		23	87		92	3126	25/27
Stomach Adenocarcinoma (TCGA, PanCancer Atlas)	TCGA-BR-8289-01	Intestinal Type Stomach Adenocarcinoma	TCOF1-GPX3	OncoKB: Unknown, level NA;CIViC: NA;MyCancerGenome: not present;CancerHotspot: no;3DHotspot: no	MutationAssessor: NA;SIFT: NA;Polyphen-2: NA	fusion	FUSION	amp				WashU	NA	-1												192
Stomach Adenocarcinoma (TCGA, PanCancer Atlas)	TCGA-D7-6527-01	Papillary Stomach Adenocarcinoma	PPARGC1B-TCOF1	OncoKB: Unknown, level NA;CIViC: NA;MyCancerGenome: not present;CancerHotspot: no;3DHotspot: no	MutationAssessor: NA;SIFT: NA;Polyphen-2: NA	fusion	FUSION	amp				WashU	NA	-1												199
Stomach Adenocarcinoma (TCGA, PanCancer Atlas)	TCGA-BR-4184-01	Stomach Adenocarcinoma	A1291V	OncoKB: NA;CIViC: NA;MyCancerGenome: not present;CancerHotspot: no;3DHotspot: no	MutationAssessor: impact: low, score: 1.7;SIFT: impact: deleterious, score: 0.04;Polyphen-2: impact: benign, score: 0.013	Missense_Mutation	SNP	diploid		.	.	.	5	149775932	149775932	C	T	5:g.149775932C>T	ENST00000377797.3:c.3872C>T	0.3		15	35		65	3126	24/27
Stomach Adenocarcinoma (TCGA, PanCancer Atlas)	TCGA-BR-4280-01	Stomach Adenocarcinoma	R1048W	OncoKB: NA;CIViC: NA;MyCancerGenome: not present;CancerHotspot: no;3DHotspot: no	MutationAssessor: impact: medium, score: 2.175;SIFT: impact: deleterious, score: 0;Polyphen-2: impact: benign, score: 0.011	Missense_Mutation	SNP	diploid		.	.	.	5	149769545	149769545	C	T	5:g.149769545C>T	ENST00000377797.3:c.3142C>T	0.27		6	16		23	704	19/27
Stomach Adenocarcinoma (TCGA, PanCancer Atlas)	TCGA-BR-8360-01	Intestinal Type Stomach Adenocarcinoma	T747M	OncoKB: NA;CIViC: NA;MyCancerGenome: not present;CancerHotspot: no;3DHotspot: no	MutationAssessor: impact: low, score: 0.99;SIFT: impact: tolerated, score: 0.16;Polyphen-2: impact: benign, score: 0.014	Missense_Mutation	SNP	diploid		.	.	.	5	149756083	149756083	C	T	5:g.149756083C>T	ENST00000377797.3:c.2240C>T	0.34		11	21		51	801	14/27
Stomach Adenocarcinoma (TCGA, PanCancer Atlas)	TCGA-VQ-A94T-01	Diffuse Type Stomach Adenocarcinoma	P140L	OncoKB: NA;CIViC: NA;MyCancerGenome: not present;CancerHotspot: no;3DHotspot: no	MutationAssessor: impact: low, score: 1.275;SIFT: impact: tolerated, score: 0.23;Polyphen-2: impact: benign, score: 0.006	Missense_Mutation	SNP	gain		.	.	.	5	149748319	149748319	C	T	5:g.149748319C>T	ENST00000377797.3:c.419C>T	0.53		23	20		30	65	5/27
Stomach Adenocarcinoma (TCGA, PanCancer Atlas)	TCGA-IN-A6RL-01	Stomach Adenocarcinoma	E408K	OncoKB: NA;CIViC: NA;MyCancerGenome: not present;CancerHotspot: no;3DHotspot: no	MutationAssessor: impact: low, score: 1.88;SIFT: impact: tolerated, score: 0.23;Polyphen-2: impact: benign, score: 0.007	Missense_Mutation	SNP	shallowdel		.	.	.	5	149754318	149754318	G	A	5:g.149754318G>A	ENST00000377797.3:c.1222G>A	0.1		5	47		54	399	9/27
Stomach Adenocarcinoma (TCGA, PanCancer Atlas)	TCGA-D7-6815-01	Tubular Stomach Adenocarcinoma	Q465K	OncoKB: NA;CIViC: NA;MyCancerGenome: not present;CancerHotspot: no;3DHotspot: no	MutationAssessor: impact: low, score: 1.5;SIFT: impact: deleterious, score: 0.02;Polyphen-2: impact: benign, score: 0.277	Missense_Mutation	SNP	shallowdel		.	.	.	5	149754631	149754631	C	A	5:g.149754631C>A	ENST00000377797.3:c.1393C>A	0.08		3	34		58	118	10/27
Stomach Adenocarcinoma (TCGA, PanCancer Atlas)	TCGA-VQ-A8PO-01	Signet Ring Cell Carcinoma of the Stomach	S552L	OncoKB: NA;CIViC: NA;MyCancerGenome: not present;CancerHotspot: no;3DHotspot: no	MutationAssessor: impact: medium, score: 2.625;SIFT: impact: tolerated, score: 0.06;Polyphen-2: impact: benign, score: 0.154	Missense_Mutation	SNP	diploid		.	.	.	5	149755068	149755068	C	T	5:g.149755068C>T	ENST00000377797.3:c.1655C>T	0.23		10	34		57	750	11/27
Testicular Germ Cell Tumors (TCGA, PanCancer Atlas)	TCGA-2G-AAM4-01	Mixed Germ Cell Tumor	A490V	OncoKB: NA;CIViC: NA;MyCancerGenome: not present;CancerHotspot: no;3DHotspot: no	MutationAssessor: impact: low, score: 1.915;SIFT: impact: tolerated, score: 0.12;Polyphen-2: impact: benign, score: 0.046	Missense_Mutation	SNP	diploid		.	.	.	5	149754707	149754707	C	T	5:g.149754707C>T	ENST00000377797.3:c.1469C>T	0.32		36	76		154	16	10/27
Testicular Germ Cell Tumors (TCGA, PanCancer Atlas)	TCGA-XE-A8H5-01	Seminoma	G1407W	OncoKB: NA;CIViC: NA;MyCancerGenome: not present;CancerHotspot: no;3DHotspot: no	MutationAssessor: impact: low, score: 1.525;SIFT: impact: deleterious, score: 0;Polyphen-2: impact: probably_damaging, score: 0.992	Missense_Mutation	SNP	shallowdel		.	.	.	5	149776279	149776279	G	T	5:g.149776279G>T	ENST00000377797.3:c.4219G>T	0.24		14	44		123	29	24/27
Thymoma (TCGA, PanCancer Atlas)	TCGA-ZB-A966-01	Thymoma	Q723R	OncoKB: NA;CIViC: NA;MyCancerGenome: not present;CancerHotspot: no;3DHotspot: no	MutationAssessor: impact: medium, score: 1.98;SIFT: impact: tolerated, score: 0.24;Polyphen-2: impact: benign, score: 0.033	Missense_Mutation	SNP	diploid		.	.	.	5	149756011	149756011	A	G	5:g.149756011A>G	ENST00000377797.3:c.2168A>G	0.13	0.03	4	26	1	37	620	14/27
Thyroid Carcinoma (TCGA, PanCancer Atlas)	TCGA-E8-A2EA-01	Papillary Thyroid Cancer	P1090H	OncoKB: NA;CIViC: NA;MyCancerGenome: not present;CancerHotspot: no;3DHotspot: no	MutationAssessor: impact: low, score: 1.445;SIFT: impact: deleterious, score: 0;Polyphen-2: impact: probably_damaging, score: 0.991	Missense_Mutation	SNP	diploid		.	.	.	5	149771192	149771192	C	A	5:g.149771192C>A	ENST00000377797.3:c.3269C>A	0.08		3	34		38	312	20/27
Uterine Corpus Endometrial Carcinoma (TCGA, PanCancer Atlas)	TCGA-D1-A17C-01	Uterine Endometrioid Carcinoma	K528Rfs*68	OncoKB: NA;CIViC: NA;MyCancerGenome: not present;CancerHotspot: no;3DHotspot: no	MutationAssessor: NA;SIFT: NA;Polyphen-2: NA	Frame_Shift_Del	DEL	diploid		.	.	.	5	149754989	149754989	C	-	5:g.149754989del	ENST00000377797.3:c.1578del	0.22		13	46		71	51	11/27
Uterine Corpus Endometrial Carcinoma (TCGA, PanCancer Atlas)	TCGA-FI-A2F4-01	Uterine Endometrioid Carcinoma	K528Rfs*68	OncoKB: NA;CIViC: NA;MyCancerGenome: not present;CancerHotspot: no;3DHotspot: no	MutationAssessor: NA;SIFT: NA;Polyphen-2: NA	Frame_Shift_Del	DEL	diploid		.	.	.	5	149754989	149754989	C	-	5:g.149754989del	ENST00000377797.3:c.1578del	0.25		16	47		46	1908	11/27
Uterine Corpus Endometrial Carcinoma (TCGA, PanCancer Atlas)	TCGA-B5-A1MX-01	Uterine Endometrioid Carcinoma	K219Nfs*30	OncoKB: NA;CIViC: NA;MyCancerGenome: not present;CancerHotspot: no;3DHotspot: no	MutationAssessor: NA;SIFT: NA;Polyphen-2: NA	Frame_Shift_Del	DEL	diploid		.	.	.	5	149751583	149751583	A	-	5:g.149751583del	ENST00000377797.3:c.657del	0.11		4	32		45	5697	7/27
Uterine Corpus Endometrial Carcinoma (TCGA, PanCancer Atlas)	TCGA-AX-A0J0-01	Uterine Endometrioid Carcinoma	E1457Rfs*15	OncoKB: NA;CIViC: NA;MyCancerGenome: not present;CancerHotspot: no;3DHotspot: no	MutationAssessor: NA;SIFT: NA;Polyphen-2: NA	Frame_Shift_Ins	INS	diploid		.	.	.	5	149777931	149777932	-	A	5:g.149777931_149777932insA	ENST00000377797.3:c.4368dup	0.36		53	95		48	7790	25/27
Uterine Corpus Endometrial Carcinoma (TCGA, PanCancer Atlas)	TCGA-FI-A2D0-01	Uterine Endometrioid Carcinoma	E1457Rfs*15	OncoKB: NA;CIViC: NA;MyCancerGenome: not present;CancerHotspot: no;3DHotspot: no	MutationAssessor: NA;SIFT: NA;Polyphen-2: NA	Frame_Shift_Ins	INS	diploid		.	.	.	5	149777931	149777932	-	A	5:g.149777931_149777932insA	ENST00000377797.3:c.4368dup	0.24		10	31		39	6445	25/27
Uterine Corpus Endometrial Carcinoma (TCGA, PanCancer Atlas)	TCGA-EO-A22X-01	Uterine Endometrioid Carcinoma	R1048W	OncoKB: NA;CIViC: NA;MyCancerGenome: not present;CancerHotspot: no;3DHotspot: no	MutationAssessor: impact: medium, score: 2.175;SIFT: impact: deleterious, score: 0;Polyphen-2: impact: benign, score: 0.011	Missense_Mutation	SNP	diploid		.	.	.	5	149769545	149769545	C	T	5:g.149769545C>T	ENST00000377797.3:c.3142C>T	0.48		23	25		41	9429	19/27
Uterine Corpus Endometrial Carcinoma (TCGA, PanCancer Atlas)	TCGA-AP-A056-01	Uterine Endometrioid Carcinoma	K122Q	OncoKB: NA;CIViC: NA;MyCancerGenome: not present;CancerHotspot: no;3DHotspot: no	MutationAssessor: impact: medium, score: 2.455;SIFT: impact: deleterious, score: 0;Polyphen-2: impact: probably_damaging, score: 0.998	Missense_Mutation	SNP	diploid	1	.	.	.	5	149747466	149747466	A	C	5:g.149747466A>C	ENST00000377797.3:c.364A>C	0.33		16	32		39	8230	4/27
Uterine Corpus Endometrial Carcinoma (TCGA, PanCancer Atlas)	TCGA-AX-A0J1-01	Uterine Endometrioid Carcinoma	A69V	OncoKB: NA;CIViC: NA;MyCancerGenome: not present;CancerHotspot: no;3DHotspot: no	MutationAssessor: impact: medium, score: 2.255;SIFT: impact: deleterious, score: 0.04;Polyphen-2: impact: possibly_damaging, score: 0.866	Missense_Mutation	SNP	diploid	1	.	.	.	5	149743717	149743717	C	T	5:g.149743717C>T	ENST00000377797.3:c.206C>T	0.35		33	62		50	5126	3/27
Uterine Corpus Endometrial Carcinoma (TCGA, PanCancer Atlas)	TCGA-B5-A11E-01	Uterine Endometrioid Carcinoma	S615L	OncoKB: NA;CIViC: NA;MyCancerGenome: not present;CancerHotspot: no;3DHotspot: no	MutationAssessor: impact: medium, score: 2.785;SIFT: impact: deleterious, score: 0.02;Polyphen-2: impact: possibly_damaging, score: 0.694	Missense_Mutation	SNP	diploid		.	.	.	5	149755423	149755423	C	T	5:g.149755423C>T	ENST00000377797.3:c.1844C>T	0.45		9	11		23	9039	12/27
Uterine Corpus Endometrial Carcinoma (TCGA, PanCancer Atlas)	TCGA-D1-A103-01	Uterine Endometrioid Carcinoma	G721S	OncoKB: NA;CIViC: NA;MyCancerGenome: not present;CancerHotspot: no;3DHotspot: no	MutationAssessor: impact: low, score: 1.565;SIFT: impact: tolerated, score: 0.55;Polyphen-2: impact: benign, score: 0.02	Missense_Mutation	SNP	diploid		.	.	.	5	149756004	149756004	G	A	5:g.149756004G>A	ENST00000377797.3:c.2161G>A	0.42		42	57		81	6849	14/27
Uterine Corpus Endometrial Carcinoma (TCGA, PanCancer Atlas)	TCGA-D1-A103-01	Uterine Endometrioid Carcinoma	S823F	OncoKB: NA;CIViC: NA;MyCancerGenome: not present;CancerHotspot: no;3DHotspot: no	MutationAssessor: impact: medium, score: 2.965;SIFT: impact: deleterious, score: 0;Polyphen-2: impact: probably_damaging, score: 0.948	Missense_Mutation	SNP	diploid		.	.	.	5	149758595	149758595	C	T	5:g.149758595C>T	ENST00000377797.3:c.2468C>T	0.28		19	48		54	6849	15/27
Uterine Corpus Endometrial Carcinoma (TCGA, PanCancer Atlas)	TCGA-D1-A17M-01	Uterine Endometrioid Carcinoma	S771N	OncoKB: NA;CIViC: NA;MyCancerGenome: not present;CancerHotspot: no;3DHotspot: no	MutationAssessor: impact: medium, score: 2.285;SIFT: impact: tolerated, score: 0.14;Polyphen-2: impact: benign, score: 0.011	Missense_Mutation	SNP	diploid		.	.	.	5	149756155	149756155	G	A	5:g.149756155G>A	ENST00000377797.3:c.2312G>A	0.16		25	135		115	435	14/27
Uterine Corpus Endometrial Carcinoma (TCGA, PanCancer Atlas)	TCGA-B5-A1MX-01	Uterine Endometrioid Carcinoma	K264N	OncoKB: NA;CIViC: NA;MyCancerGenome: not present;CancerHotspot: no;3DHotspot: no	MutationAssessor: impact: medium, score: 2.28;SIFT: NA;Polyphen-2: NA	Missense_Mutation	SNP	diploid		.	.	.	5	149751721	149751721	G	T	5:g.149751721G>T	ENST00000377797.3:c.792G>T	0.46		13	15		51	5697	7/27
Uterine Corpus Endometrial Carcinoma (TCGA, PanCancer Atlas)	TCGA-FI-A2D0-01	Uterine Endometrioid Carcinoma	D963N	OncoKB: NA;CIViC: NA;MyCancerGenome: not present;CancerHotspot: no;3DHotspot: no	MutationAssessor: impact: low, score: 1.04;SIFT: impact: tolerated, score: 0.16;Polyphen-2: impact: benign, score: 0.177	Missense_Mutation	SNP	diploid		.	.	.	5	149767492	149767492	G	A	5:g.149767492G>A	ENST00000377797.3:c.2887G>A	0.55		16	13		50	6445	18/27
Uterine Corpus Endometrial Carcinoma (TCGA, PanCancer Atlas)	TCGA-AX-A2HC-01	Uterine Endometrioid Carcinoma	L298I	OncoKB: NA;CIViC: NA;MyCancerGenome: not present;CancerHotspot: no;3DHotspot: no	MutationAssessor: impact: low, score: 1.61;SIFT: impact: tolerated, score: 0.45;Polyphen-2: impact: benign, score: 0.012	Missense_Mutation	SNP	diploid		.	.	.	5	149753758	149753758	C	A	5:g.149753758C>A	ENST00000377797.3:c.892C>A	0.5		10	10		24	12976	8/27
Uterine Corpus Endometrial Carcinoma (TCGA, PanCancer Atlas)	TCGA-E6-A1M0-01	Uterine Endometrioid Carcinoma	L298I	OncoKB: NA;CIViC: NA;MyCancerGenome: not present;CancerHotspot: no;3DHotspot: no	MutationAssessor: impact: low, score: 1.61;SIFT: impact: tolerated, score: 0.45;Polyphen-2: impact: benign, score: 0.012	Missense_Mutation	SNP	diploid		.	.	.	5	149753758	149753758	C	A	5:g.149753758C>A	ENST00000377797.3:c.892C>A	0.45		5	6		19	1737	8/27
Uterine Corpus Endometrial Carcinoma (TCGA, PanCancer Atlas)	TCGA-EO-A22R-01	Uterine Endometrioid Carcinoma	L1409F	OncoKB: NA;CIViC: NA;MyCancerGenome: not present;CancerHotspot: no;3DHotspot: no	MutationAssessor: impact: neutral, score: 0.755;SIFT: impact: tolerated, score: 0.44;Polyphen-2: impact: benign, score: 0.001	Missense_Mutation	SNP	diploid		.	.	.	5	149776285	149776285	C	T	5:g.149776285C>T	ENST00000377797.3:c.4225C>T	0.18		7	31		33	12771	24/27
Uterine Corpus Endometrial Carcinoma (TCGA, PanCancer Atlas)	TCGA-EO-A22U-01	Uterine Endometrioid Carcinoma	L298F	OncoKB: NA;CIViC: NA;MyCancerGenome: not present;CancerHotspot: no;3DHotspot: no	MutationAssessor: impact: medium, score: 1.955;SIFT: impact: deleterious, score: 0.05;Polyphen-2: impact: benign, score: 0.01	Missense_Mutation	SNP	diploid		.	.	.	5	149753758	149753758	C	T	5:g.149753758C>T	ENST00000377797.3:c.892C>T	0.56		10	8		9	13829	8/27
Uterine Corpus Endometrial Carcinoma (TCGA, PanCancer Atlas)	TCGA-EO-A22X-01	Uterine Endometrioid Carcinoma	L298F	OncoKB: NA;CIViC: NA;MyCancerGenome: not present;CancerHotspot: no;3DHotspot: no	MutationAssessor: impact: medium, score: 1.955;SIFT: impact: deleterious, score: 0.05;Polyphen-2: impact: benign, score: 0.01	Missense_Mutation	SNP	diploid		.	.	.	5	149753758	149753758	C	T	5:g.149753758C>T	ENST00000377797.3:c.892C>T	0.46		6	7		11	9429	8/27
Uterine Corpus Endometrial Carcinoma (TCGA, PanCancer Atlas)	TCGA-A5-A0G1-01	Uterine Serous Carcinoma/Uterine Papillary Serous Carcinoma	A439T	OncoKB: NA;CIViC: NA;MyCancerGenome: not present;CancerHotspot: no;3DHotspot: no	MutationAssessor: impact: low, score: 1.82;SIFT: impact: tolerated, score: 0.25;Polyphen-2: impact: benign, score: 0.02	Missense_Mutation	SNP	diploid		.	.	.	5	149754553	149754553	G	A	5:g.149754553G>A	ENST00000377797.3:c.1315G>A	0.41		11	16		45	10820	10/27
Uterine Corpus Endometrial Carcinoma (TCGA, PanCancer Atlas)	TCGA-A5-A0G1-01	Uterine Serous Carcinoma/Uterine Papillary Serous Carcinoma	L722I	OncoKB: NA;CIViC: NA;MyCancerGenome: not present;CancerHotspot: no;3DHotspot: no	MutationAssessor: impact: medium, score: 2.65;SIFT: impact: tolerated, score: 0.15;Polyphen-2: impact: benign, score: 0.15	Missense_Mutation	SNP	diploid		.	.	.	5	149756007	149756007	C	A	5:g.149756007C>A	ENST00000377797.3:c.2164C>A	0.17		24	114		121	10820	14/27
Uterine Corpus Endometrial Carcinoma (TCGA, PanCancer Atlas)	TCGA-A5-A0G2-01	Uterine Serous Carcinoma/Uterine Papillary Serous Carcinoma	A238V	OncoKB: NA;CIViC: NA;MyCancerGenome: not present;CancerHotspot: no;3DHotspot: no	MutationAssessor: impact: low, score: 1.3;SIFT: NA;Polyphen-2: NA	Missense_Mutation	SNP	shallowdel		.	.	.	5	149751642	149751642	C	T	5:g.149751642C>T	ENST00000377797.3:c.713C>T	0.17		6	30		44	25711	7/27
Uterine Corpus Endometrial Carcinoma (TCGA, PanCancer Atlas)	TCGA-A5-A0G2-01	Uterine Serous Carcinoma/Uterine Papillary Serous Carcinoma	E612K	OncoKB: NA;CIViC: NA;MyCancerGenome: not present;CancerHotspot: no;3DHotspot: no	MutationAssessor: impact: medium, score: 2.81;SIFT: impact: deleterious, score: 0.02;Polyphen-2: impact: possibly_damaging, score: 0.833	Missense_Mutation	SNP	shallowdel		.	.	.	5	149755413	149755413	G	A	5:g.149755413G>A	ENST00000377797.3:c.1834G>A	0.15		9	53		85	25711	12/27
Uterine Corpus Endometrial Carcinoma (TCGA, PanCancer Atlas)	TCGA-A5-A0G2-01	Uterine Serous Carcinoma/Uterine Papillary Serous Carcinoma	P1090L	OncoKB: NA;CIViC: NA;MyCancerGenome: not present;CancerHotspot: no;3DHotspot: no	MutationAssessor: impact: low, score: 1.79;SIFT: impact: deleterious, score: 0;Polyphen-2: impact: benign, score: 0.257	Missense_Mutation	SNP	shallowdel		.	.	.	5	149771192	149771192	C	T	5:g.149771192C>T	ENST00000377797.3:c.3269C>T	0.18		5	23		31	25711	20/27
Uterine Corpus Endometrial Carcinoma (TCGA, PanCancer Atlas)	TCGA-A5-A0G2-01	Uterine Serous Carcinoma/Uterine Papillary Serous Carcinoma	R1276W	OncoKB: NA;CIViC: NA;MyCancerGenome: not present;CancerHotspot: no;3DHotspot: no	MutationAssessor: impact: low, score: 1.1;SIFT: impact: deleterious, score: 0.03;Polyphen-2: impact: possibly_damaging, score: 0.556	Missense_Mutation	SNP	shallowdel		.	.	.	5	149775886	149775886	C	T	5:g.149775886C>T	ENST00000377797.3:c.3826C>T	0.42		19	26		38	25711	24/27
Uterine Corpus Endometrial Carcinoma (TCGA, PanCancer Atlas)	TCGA-A5-A1OF-01	Uterine Mixed Endometrial Carcinoma	A1103D	OncoKB: NA;CIViC: NA;MyCancerGenome: not present;CancerHotspot: no;3DHotspot: no	MutationAssessor: impact: low, score: 1.11;SIFT: impact: tolerated, score: 0.11;Polyphen-2: impact: possibly_damaging, score: 0.79	Missense_Mutation	SNP	diploid		.	.	.	5	149771530	149771530	C	A	5:g.149771530C>A	ENST00000377797.3:c.3308C>A	0.22		11	39		44	10493	21/27
Uterine Corpus Endometrial Carcinoma (TCGA, PanCancer Atlas)	TCGA-A5-A1OF-01	Uterine Mixed Endometrial Carcinoma	P1131H	OncoKB: NA;CIViC: NA;MyCancerGenome: not present;CancerHotspot: no;3DHotspot: no	MutationAssessor: impact: low, score: 1.895;SIFT: impact: deleterious, score: 0;Polyphen-2: impact: possibly_damaging, score: 0.906	Missense_Mutation	SNP	diploid		.	.	.	5	149771614	149771614	C	A	5:g.149771614C>A	ENST00000377797.3:c.3392C>A	0.22		10	36		39	10493	21/27
Uterine Corpus Endometrial Carcinoma (TCGA, PanCancer Atlas)	TCGA-AJ-A3EK-01	Uterine Endometrioid Carcinoma	A303V	OncoKB: NA;CIViC: NA;MyCancerGenome: not present;CancerHotspot: no;3DHotspot: no	MutationAssessor: impact: medium, score: 2.21;SIFT: impact: tolerated, score: 0.15;Polyphen-2: impact: possibly_damaging, score: 0.602	Missense_Mutation	SNP	diploid		.	.	.	5	149753774	149753774	C	T	5:g.149753774C>T	ENST00000377797.3:c.908C>T	0.25		6	18		13	5730	8/27
Uterine Corpus Endometrial Carcinoma (TCGA, PanCancer Atlas)	TCGA-AP-A1DK-01	Uterine Endometrioid Carcinoma	P259L	OncoKB: NA;CIViC: NA;MyCancerGenome: not present;CancerHotspot: no;3DHotspot: no	MutationAssessor: impact: low, score: 1.555;SIFT: NA;Polyphen-2: NA	Missense_Mutation	SNP	diploid		.	.	.	5	149751705	149751705	C	T	5:g.149751705C>T	ENST00000377797.3:c.776C>T	0.24		8	25		36	10312	7/27
Uterine Corpus Endometrial Carcinoma (TCGA, PanCancer Atlas)	TCGA-AP-A1DK-01	Uterine Endometrioid Carcinoma	S479N	OncoKB: NA;CIViC: NA;MyCancerGenome: not present;CancerHotspot: no;3DHotspot: no	MutationAssessor: impact: medium, score: 2.765;SIFT: impact: deleterious, score: 0.01;Polyphen-2: impact: possibly_damaging, score: 0.728	Missense_Mutation	SNP	diploid		.	.	.	5	149754674	149754674	G	A	5:g.149754674G>A	ENST00000377797.3:c.1436G>A	0.33		16	32		45	10312	10/27
Uterine Corpus Endometrial Carcinoma (TCGA, PanCancer Atlas)	TCGA-AP-A1DV-01	Uterine Endometrioid Carcinoma	S120I	OncoKB: NA;CIViC: NA;MyCancerGenome: not present;CancerHotspot: no;3DHotspot: no	MutationAssessor: impact: medium, score: 2.135;SIFT: impact: deleterious, score: 0;Polyphen-2: impact: possibly_damaging, score: 0.66	Missense_Mutation	SNP	diploid		.	.	.	5	149747461	149747461	G	T	5:g.149747461G>T	ENST00000377797.3:c.359G>T	0.29		13	32		25	12063	4/27
Uterine Corpus Endometrial Carcinoma (TCGA, PanCancer Atlas)	TCGA-AX-A06F-01	Uterine Endometrioid Carcinoma	P216H	OncoKB: NA;CIViC: NA;MyCancerGenome: not present;CancerHotspot: no;3DHotspot: no	MutationAssessor: impact: low, score: 1.525;SIFT: NA;Polyphen-2: NA	Missense_Mutation	SNP	diploid		.	.	.	5	149751576	149751576	C	A	5:g.149751576C>A	ENST00000377797.3:c.647C>A	0.49		23	24		44	7282	7/27
Uterine Corpus Endometrial Carcinoma (TCGA, PanCancer Atlas)	TCGA-AX-A1C5-01	Uterine Endometrioid Carcinoma	A797T	OncoKB: NA;CIViC: NA;MyCancerGenome: not present;CancerHotspot: no;3DHotspot: no	MutationAssessor: impact: neutral, score: -2.145;SIFT: impact: tolerated, score: 1;Polyphen-2: impact: benign, score: 0	Missense_Mutation	SNP	diploid		.	.	.	5	149758516	149758516	G	A	5:g.149758516G>A	ENST00000377797.3:c.2389G>A	0.41		7	10		15	844	15/27
Uterine Corpus Endometrial Carcinoma (TCGA, PanCancer Atlas)	TCGA-AX-A1CE-01	Uterine Endometrioid Carcinoma	P964H	OncoKB: NA;CIViC: NA;MyCancerGenome: not present;CancerHotspot: no;3DHotspot: no	MutationAssessor: impact: medium, score: 2.25;SIFT: impact: deleterious, score: 0;Polyphen-2: impact: probably_damaging, score: 0.977	Missense_Mutation	SNP	diploid		.	.	.	5	149767496	149767496	C	A	5:g.149767496C>A	ENST00000377797.3:c.2891C>A	0.32		7	15		29	11440	18/27
Uterine Corpus Endometrial Carcinoma (TCGA, PanCancer Atlas)	TCGA-AX-A2HD-01	Uterine Endometrioid Carcinoma	A362V	OncoKB: NA;CIViC: NA;MyCancerGenome: not present;CancerHotspot: no;3DHotspot: no	MutationAssessor: impact: neutral, score: 0.095;SIFT: impact: tolerated, score: 1;Polyphen-2: impact: benign, score: 0	Missense_Mutation	SNP	diploid		.	.	.	5	149754181	149754181	C	T	5:g.149754181C>T	ENST00000377797.3:c.1085C>T	0.53		21	19		32	7848	9/27
Uterine Corpus Endometrial Carcinoma (TCGA, PanCancer Atlas)	TCGA-AX-A2HD-01	Uterine Endometrioid Carcinoma	R966H	OncoKB: NA;CIViC: NA;MyCancerGenome: not present;CancerHotspot: no;3DHotspot: no	MutationAssessor: impact: medium, score: 2.25;SIFT: impact: tolerated, score: 0.07;Polyphen-2: impact: probably_damaging, score: 0.988	Missense_Mutation	SNP	diploid		.	.	.	5	149767502	149767502	G	A	5:g.149767502G>A	ENST00000377797.3:c.2897G>A	0.41		15	22		37	7848	18/27
Uterine Corpus Endometrial Carcinoma (TCGA, PanCancer Atlas)	TCGA-AX-A2HD-01	Uterine Endometrioid Carcinoma	S1339I	OncoKB: NA;CIViC: NA;MyCancerGenome: not present;CancerHotspot: no;3DHotspot: no	MutationAssessor: impact: low, score: 1.935;SIFT: impact: deleterious, score: 0;Polyphen-2: impact: possibly_damaging, score: 0.804	Missense_Mutation	SNP	diploid		.	.	.	5	149776076	149776076	G	T	5:g.149776076G>T	ENST00000377797.3:c.4016G>T	0.52		16	15		24	7848	24/27
Uterine Corpus Endometrial Carcinoma (TCGA, PanCancer Atlas)	TCGA-B5-A1MX-01	Uterine Endometrioid Carcinoma	R158M	OncoKB: NA;CIViC: NA;MyCancerGenome: not present;CancerHotspot: no;3DHotspot: no	MutationAssessor: impact: low, score: 1.385;SIFT: impact: deleterious, score: 0;Polyphen-2: impact: possibly_damaging, score: 0.563	Missense_Mutation	SNP	diploid		.	.	.	5	149748373	149748373	G	T	5:g.149748373G>T	ENST00000377797.3:c.473G>T	0.25		3	9		17	5697	5/27
Uterine Corpus Endometrial Carcinoma (TCGA, PanCancer Atlas)	TCGA-B5-A3FC-01	Uterine Endometrioid Carcinoma	G372R	OncoKB: NA;CIViC: NA;MyCancerGenome: not present;CancerHotspot: no;3DHotspot: no	MutationAssessor: impact: neutral, score: -2.225;SIFT: impact: tolerated, score: 1;Polyphen-2: impact: benign, score: 0	Missense_Mutation	SNP	diploid		.	.	.	5	149754210	149754210	G	A	5:g.149754210G>A	ENST00000377797.3:c.1114G>A	0.35		9	17		51	12211	9/27
Uterine Corpus Endometrial Carcinoma (TCGA, PanCancer Atlas)	TCGA-BG-A222-01	Uterine Endometrioid Carcinoma	A462V	OncoKB: NA;CIViC: NA;MyCancerGenome: not present;CancerHotspot: no;3DHotspot: no	MutationAssessor: impact: low, score: 1.145;SIFT: impact: tolerated, score: 0.36;Polyphen-2: impact: benign, score: 0.01	Missense_Mutation	SNP	diploid		.	.	.	5	149754623	149754623	C	T	5:g.149754623C>T	ENST00000377797.3:c.1385C>T	0.25		9	27		43	4274	10/27
Uterine Corpus Endometrial Carcinoma (TCGA, PanCancer Atlas)	TCGA-D1-A103-01	Uterine Endometrioid Carcinoma	T1428M	OncoKB: NA;CIViC: NA;MyCancerGenome: not present;CancerHotspot: no;3DHotspot: no	MutationAssessor: impact: neutral, score: 0;SIFT: impact: tolerated, score: 0.11;Polyphen-2: impact: benign, score: 0	Missense_Mutation	SNP	diploid		.	.	.	5	149776343	149776343	C	T	5:g.149776343C>T	ENST00000377797.3:c.4283C>T	0.25		4	12		14	6849	24/27
Uterine Corpus Endometrial Carcinoma (TCGA, PanCancer Atlas)	TCGA-D1-A17M-01	Uterine Endometrioid Carcinoma	G943R	OncoKB: NA;CIViC: NA;MyCancerGenome: not present;CancerHotspot: no;3DHotspot: no	MutationAssessor: impact: low, score: 0.915;SIFT: impact: tolerated, score: 0.34;Polyphen-2: impact: benign, score: 0.001	Missense_Mutation	SNP	diploid		.	.	.	5	149759263	149759263	G	A	5:g.149759263G>A	ENST00000377797.3:c.2827G>A	0.1		4	38		45	435	17/27
Uterine Corpus Endometrial Carcinoma (TCGA, PanCancer Atlas)	TCGA-D1-A2G0-01	Uterine Mixed Endometrial Carcinoma	Q1164H	OncoKB: NA;CIViC: NA;MyCancerGenome: not present;CancerHotspot: no;3DHotspot: no	MutationAssessor: impact: low, score: 1.87;SIFT: impact: deleterious, score: 0.01;Polyphen-2: impact: possibly_damaging, score: 0.821	Missense_Mutation	SNP	diploid		.	.	.	5	149771714	149771714	G	T	5:g.149771714G>T	ENST00000377797.3:c.3492G>T	0.55		21	17		44	816	21/27
Uterine Corpus Endometrial Carcinoma (TCGA, PanCancer Atlas)	TCGA-DF-A2KN-01	Uterine Endometrioid Carcinoma	P1128L	OncoKB: NA;CIViC: NA;MyCancerGenome: not present;CancerHotspot: no;3DHotspot: no	MutationAssessor: impact: medium, score: 1.955;SIFT: impact: deleterious, score: 0;Polyphen-2: impact: benign, score: 0.232	Missense_Mutation	SNP	diploid		.	.	.	5	149771605	149771605	C	T	5:g.149771605C>T	ENST00000377797.3:c.3383C>T	0.29		10	24		46	4342	21/27
Uterine Corpus Endometrial Carcinoma (TCGA, PanCancer Atlas)	TCGA-E6-A1LX-01	Uterine Endometrioid Carcinoma	R77C	OncoKB: NA;CIViC: NA;MyCancerGenome: not present;CancerHotspot: no;3DHotspot: no	MutationAssessor: impact: medium, score: 2.545;SIFT: impact: deleterious, score: 0;Polyphen-2: impact: probably_damaging, score: 1	Missense_Mutation	SNP	diploid	2	.	.	.	5	149743740	149743740	C	T	5:g.149743740C>T	ENST00000377797.3:c.229C>T	0.21		7	27		21	12691	3/27
Uterine Corpus Endometrial Carcinoma (TCGA, PanCancer Atlas)	TCGA-E6-A1LX-01	Uterine Endometrioid Carcinoma	R448S	OncoKB: NA;CIViC: NA;MyCancerGenome: not present;CancerHotspot: no;3DHotspot: no	MutationAssessor: impact: medium, score: 2.455;SIFT: impact: tolerated, score: 0.18;Polyphen-2: impact: benign, score: 0.058	Missense_Mutation	SNP	diploid		.	.	.	5	149754582	149754582	G	T	5:g.149754582G>T	ENST00000377797.3:c.1344G>T	0.09		5	50		39	12691	10/27
Uterine Corpus Endometrial Carcinoma (TCGA, PanCancer Atlas)	TCGA-E6-A1LX-01	Uterine Endometrioid Carcinoma	R1018I	OncoKB: NA;CIViC: NA;MyCancerGenome: not present;CancerHotspot: no;3DHotspot: no	MutationAssessor: impact: medium, score: 2.175;SIFT: impact: deleterious, score: 0.02;Polyphen-2: impact: possibly_damaging, score: 0.735	Missense_Mutation	SNP	diploid		.	.	.	5	149769456	149769456	G	T	5:g.149769456G>T	ENST00000377797.3:c.3053G>T	0.21		15	58		55	12691	19/27
Uterine Corpus Endometrial Carcinoma (TCGA, PanCancer Atlas)	TCGA-EO-A22U-01	Uterine Endometrioid Carcinoma	A356V	OncoKB: NA;CIViC: NA;MyCancerGenome: not present;CancerHotspot: no;3DHotspot: no	MutationAssessor: impact: low, score: 1.655;SIFT: impact: deleterious, score: 0.03;Polyphen-2: impact: benign, score: 0.018	Missense_Mutation	SNP	diploid		.	.	.	5	149753933	149753933	C	T	5:g.149753933C>T	ENST00000377797.3:c.1067C>T	0.43		24	32		26	13829	8/27
Uterine Corpus Endometrial Carcinoma (TCGA, PanCancer Atlas)	TCGA-EO-A3B0-01	Uterine Endometrioid Carcinoma	T883M	OncoKB: NA;CIViC: NA;MyCancerGenome: not present;CancerHotspot: no;3DHotspot: no	MutationAssessor: impact: low, score: 1.575;SIFT: impact: tolerated, score: 0.24;Polyphen-2: impact: benign, score: 0.001	Missense_Mutation	SNP	diploid		.	.	.	5	149758961	149758961	C	T	5:g.149758961C>T	ENST00000377797.3:c.2648C>T	0.26		9	25		39	10909	16/27
Uterine Corpus Endometrial Carcinoma (TCGA, PanCancer Atlas)	TCGA-EO-A3KX-01	Uterine Endometrioid Carcinoma	G573W	OncoKB: NA;CIViC: NA;MyCancerGenome: not present;CancerHotspot: no;3DHotspot: no	MutationAssessor: impact: medium, score: 2.955;SIFT: impact: deleterious, score: 0;Polyphen-2: impact: probably_damaging, score: 1	Missense_Mutation	SNP	diploid		.	.	.	5	149755296	149755296	G	T	5:g.149755296G>T	ENST00000377797.3:c.1717G>T	0.15		6	33		18	3203	12/27
Uterine Corpus Endometrial Carcinoma (TCGA, PanCancer Atlas)	TCGA-EY-A1GI-01	Uterine Endometrioid Carcinoma	S1069Y	OncoKB: NA;CIViC: NA;MyCancerGenome: not present;CancerHotspot: no;3DHotspot: no	MutationAssessor: impact: low, score: 1.59;SIFT: impact: deleterious, score: 0.02;Polyphen-2: impact: benign, score: 0.246	Missense_Mutation	SNP	diploid		.	.	.	5	149771129	149771129	C	A	5:g.149771129C>A	ENST00000377797.3:c.3206C>A	0.25		5	15		23	4488	20/27
Uterine Corpus Endometrial Carcinoma (TCGA, PanCancer Atlas)	TCGA-FI-A2D5-01	Uterine Endometrioid Carcinoma	L59F	OncoKB: NA;CIViC: NA;MyCancerGenome: not present;CancerHotspot: no;3DHotspot: no	MutationAssessor: impact: medium, score: 2.015;SIFT: impact: deleterious, score: 0.01;Polyphen-2: impact: possibly_damaging, score: 0.49	Missense_Mutation	SNP	diploid		.	.	.	5	149743686	149743686	C	T	5:g.149743686C>T	ENST00000377797.3:c.175C>T	0.31		9	20		52	13865	3/27
Uterine Corpus Endometrial Carcinoma (TCGA, PanCancer Atlas)	TCGA-B5-A0JY-01	Uterine Endometrioid Carcinoma	E1381*	OncoKB: NA;CIViC: NA;MyCancerGenome: not present;CancerHotspot: no;3DHotspot: no	MutationAssessor: NA;SIFT: NA;Polyphen-2: NA	Nonsense_Mutation	SNP	diploid		.	.	.	5	149776201	149776201	G	T	5:g.149776201G>T	ENST00000377797.3:c.4141G>T	0.27		14	37		33	9706	24/27
Uterine Corpus Endometrial Carcinoma (TCGA, PanCancer Atlas)	TCGA-DI-A2QU-01	Uterine Endometrioid Carcinoma	S475*	OncoKB: NA;CIViC: NA;MyCancerGenome: not present;CancerHotspot: no;3DHotspot: no	MutationAssessor: NA;SIFT: NA;Polyphen-2: NA	Nonsense_Mutation	SNP	gain		.	.	.	5	149754662	149754662	C	G	5:g.149754662C>G	ENST00000377797.3:c.1424C>G	0.24	0.02	21	65	1	45	63	10/27
Uterine Corpus Endometrial Carcinoma (TCGA, PanCancer Atlas)	TCGA-FI-A2F4-01	Uterine Endometrioid Carcinoma	Q1487*	OncoKB: NA;CIViC: NA;MyCancerGenome: not present;CancerHotspot: no;3DHotspot: no	MutationAssessor: NA;SIFT: NA;Polyphen-2: NA	Nonsense_Mutation	SNP	diploid		.	.	.	5	149778600	149778600	C	T	5:g.149778600C>T	ENST00000377797.3:c.4459C>T	0.22		8	28		46	1908	26/27
