# Supplementary material for: The oncogenic role of treacle ribosome biogenesis factor 1 (TCOF1) in human tumors: a pan-cancer analysis
Source: Aging (Albany NY). 2022 Jan 30;14(2):943–60. doi: 10.18632/aging.203852 (PMC8833134; doi:10.18632/aging.203852)
Supplement: Supplementary Table 2 [file aging-14-203852-s005.xlsx]

## Sheet: ACC
Supplementary Table 2. Genome-wide association of TCOF1 mRNA in cancer.
id_a	pretty_label_a	datatype_a	chr_a	start_a	end_a	id_b	pretty_label_b	datatype_b	chr_b	start_b	end_b	link_distance	adj_logged_pvalue	logged_pvalue	correlation	num_nonna
N:CNVR:5q31:chr5:139457000:143224999::	chr5:139,457,000-143,224,999 (4bp, 5q31)	CNVR	5	139457000	143224999	N:GEXP:TCOF1:chr5:149737202:149779871:+:6949	TCOF1	GEXP	5	149737202	149779871	6512203	8.7	15.9	0.78	76
N:CNVR:5q32:chr5:143225000:152363999::	chr5:143,225,000-152,363,999 (9bp, 5q32)	CNVR	5	143225000	152363999	N:GEXP:TCOF1:chr5:149737202:149779871:+:6949	TCOF1	GEXP	5	149737202	149779871	0	8.4	15.6	0.77	76
N:CNVR:5q14.3:chr5:70691000:92011999::	chr5:70,691,000-92,011,999 (21bp, 5q14.3)	CNVR	5	70691000	92011999	N:GEXP:TCOF1:chr5:149737202:149779871:+:6949	TCOF1	GEXP	5	149737202	149779871	57725203	7	14.2	0.75	76
N:CNVR:5q34:chr5:167541000:167542999::	chr5:167,541,000-167,542,999 (2Mb, 5q34)	CNVR	5	167541000	167542999	N:GEXP:TCOF1:chr5:149737202:149779871:+:6949	TCOF1	GEXP	5	149737202	149779871	17761129	6.2	13.4	0.74	76
N:CNVR:5q14.3:chr5:92012000:92090999::	chr5:92,012,000-92,090,999 (79Mb, 5q14.3)	CNVR	5	92012000	92090999	N:GEXP:TCOF1:chr5:149737202:149779871:+:6949	TCOF1	GEXP	5	149737202	149779871	57646203	5.8	13	0.73	76
N:CNVR:5q35.1:chr5:170016000:170016999::	chr5:170,016,000-170,016,999 (100kb, 5q35.1)	CNVR	5	170016000	170016999	N:GEXP:TCOF1:chr5:149737202:149779871:+:6949	TCOF1	GEXP	5	149737202	149779871	20236129	5	12.2	0.72	73
N:CNVR:5q23.2:chr5:117387000:139456999::	chr5:117,387,000-139,456,999 (22bp, 5q23.2)	CNVR	5	117387000	139456999	N:GEXP:TCOF1:chr5:149737202:149779871:+:6949	TCOF1	GEXP	5	149737202	149779871	10280203	5	12.1	0.71	76
N:CNVR:5q22:chr5:112938000:114755999::	chr5:112,938,000-114,755,999 (2bp, 5q22)	CNVR	5	112938000	114755999	N:GEXP:TCOF1:chr5:149737202:149779871:+:6949	TCOF1	GEXP	5	149737202	149779871	34981203	4.7	11.9	0.7	76
N:CNVR:5q13.2:chr5:64793000:70688999::	chr5:64,793,000-70,688,999 (6bp, 5q13.2)	CNVR	5	64793000	70688999	N:GEXP:TCOF1:chr5:149737202:149779871:+:6949	TCOF1	GEXP	5	149737202	149779871	79048203	4.6	11.8	0.7	76
N:CNVR:5q33:chr5:152364000:158686999::	chr5:152,364,000-158,686,999 (6bp, 5q33)	CNVR	5	152364000	158686999	N:GEXP:TCOF1:chr5:149737202:149779871:+:6949	TCOF1	GEXP	5	149737202	149779871	2584129	4.5	11.6	0.7	76
N:CNVR:5q22.3:chr5:114757000:114758999::	chr5:114,757,000-114,758,999 (2Mb, 5q22.3)	CNVR	5	114757000	114758999	N:GEXP:TCOF1:chr5:149737202:149779871:+:6949	TCOF1	GEXP	5	149737202	149779871	34978203	4.2	11.4	0.73	65
N:GEXP:CSNK1A1:chr5:148871760:148931007:-:1452	CSNK1A1	GEXP	5	148871760	148931007	N:GEXP:TCOF1:chr5:149737202:149779871:+:6949	TCOF1	GEXP	5	149737202	149779871	806195	3.2	11.3	0.69	78
N:CNVR:5q23.1:chr5:117386000:117386999::	chr5:117,386,000-117,386,999 (100kb, 5q23.1)	CNVR	5	117386000	117386999	N:GEXP:TCOF1:chr5:149737202:149779871:+:6949	TCOF1	GEXP	5	149737202	149779871	32350203	4	11.2	0.69	76
N:GEXP:RBM22:chr5:150070356:150080669:-:55696	RBM22	GEXP	5	150070356	150080669	N:GEXP:TCOF1:chr5:149737202:149779871:+:6949	TCOF1	GEXP	5	149737202	149779871	290485	3	11.2	0.68	78
N:CNVR:5q23.1:chr5:114759000:117385999::	chr5:114,759,000-117,385,999 (3bp, 5q23.1)	CNVR	5	114759000	117385999	N:GEXP:TCOF1:chr5:149737202:149779871:+:6949	TCOF1	GEXP	5	149737202	149779871	32351203	4	11.2	0.69	76
N:GEXP:GRPEL2:chr5:148724993:148734146:+:134266	GRPEL2	GEXP	5	148724993	148734146	N:GEXP:TCOF1:chr5:149737202:149779871:+:6949	TCOF1	GEXP	5	149737202	149779871	1003056	2.8	10.9	0.67	78
N:CNVR:5q12.3:chr5:63986000:64769999::	chr5:63,986,000-64,769,999 (784Mb, 5q12.3)	CNVR	5	63986000	64769999	N:GEXP:TCOF1:chr5:149737202:149779871:+:6949	TCOF1	GEXP	5	149737202	149779871	84967203	3.5	10.7	0.68	76
N:CNVR:5q12.3:chr5:64770000:64792999::	chr5:64,770,000-64,792,999 (23Mb, 5q12.3)	CNVR	5	64770000	64792999	N:GEXP:TCOF1:chr5:149737202:149779871:+:6949	TCOF1	GEXP	5	149737202	149779871	84944203	3.5	10.7	0.68	76
N:CNVR:5q11.2:chr5:50124000:63369999::	chr5:50,124,000-63,369,999 (13bp, 5q11.2)	CNVR	5	50124000	63369999	N:GEXP:TCOF1:chr5:149737202:149779871:+:6949	TCOF1	GEXP	5	149737202	149779871	86367203	3.4	10.6	0.67	76
N:CNVR:5q21.1:chr5:101723000:102585999::	chr5:101,723,000-102,585,999 (863Mb, 5q21.1)	CNVR	5	101723000	102585999	N:GEXP:TCOF1:chr5:149737202:149779871:+:6949	TCOF1	GEXP	5	149737202	149779871	47151203	3.2	10.4	0.67	76
N:CNVR:5q34:chr5:159610000:166856999::	chr5:159,610,000-166,856,999 (7bp, 5q34)	CNVR	5	159610000	166856999	N:GEXP:TCOF1:chr5:149737202:149779871:+:6949	TCOF1	GEXP	5	149737202	149779871	9830129	3.1	10.3	0.67	76
N:GEXP:TCERG1:chr5:145826874:145891524:+:10915	TCERG1	GEXP	5	145826874	145891524	N:GEXP:TCOF1:chr5:149737202:149779871:+:6949	TCOF1	GEXP	5	149737202	149779871	3845678	2	10.2	0.66	78
N:CNVR:5q34:chr5:166857000:166857999::	chr5:166,857,000-166,857,999 (100kb, 5q34)	CNVR	5	166857000	166857999	N:GEXP:TCOF1:chr5:149737202:149779871:+:6949	TCOF1	GEXP	5	149737202	149779871	17077129	2.9	10.1	0.66	76
N:CNVR:5q34:chr5:166858000:167540999::	chr5:166,858,000-167,540,999 (683Mb, 5q34)	CNVR	5	166858000	167540999	N:GEXP:TCOF1:chr5:149737202:149779871:+:6949	TCOF1	GEXP	5	149737202	149779871	17078129	2.9	10.1	0.66	76
N:GEXP:FAM53C:chr5:137667624:137685416:+:51307	FAM53C	GEXP	5	137667624	137685416	N:GEXP:TCOF1:chr5:149737202:149779871:+:6949	TCOF1	GEXP	5	149737202	149779871	12051786	1.9	10	0.65	78
N:CNVR:5q35.1:chr5:167543000:170011999::	chr5:167,543,000-170,011,999 (2bp, 5q35.1)	CNVR	5	167543000	170011999	N:GEXP:TCOF1:chr5:149737202:149779871:+:6949	TCOF1	GEXP	5	149737202	149779871	17763129	2.8	10	0.66	76
N:CNVR:5q21:chr5:102586000:107448999::	chr5:102,586,000-107,448,999 (5bp, 5q21)	CNVR	5	102586000	107448999	N:GEXP:TCOF1:chr5:149737202:149779871:+:6949	TCOF1	GEXP	5	149737202	149779871	42288203	2.6	9.8	0.65	76
N:CNVR:5q13.2:chr5:70689000:70690999::	chr5:70,689,000-70,690,999 (2Mb, 5q13.2)	CNVR	5	70689000	70690999	N:GEXP:TCOF1:chr5:149737202:149779871:+:6949	TCOF1	GEXP	5	149737202	149779871	79046203	2.5	9.7	0.65	76
N:CNVR:5q15:chr5:92091000:97820999::	chr5:92,091,000-97,820,999 (6bp, 5q15)	CNVR	5	92091000	97820999	N:GEXP:TCOF1:chr5:149737202:149779871:+:6949	TCOF1	GEXP	5	149737202	149779871	51916203	2.4	9.6	0.65	76
N:CNVR:5q15:chr5:97821000:98270999::	chr5:97,821,000-98,270,999 (450Mb, 5q15)	CNVR	5	97821000	98270999	N:GEXP:TCOF1:chr5:149737202:149779871:+:6949	TCOF1	GEXP	5	149737202	149779871	51466203	2.3	9.5	0.64	76
N:CNVR:5q12.3:chr5:63370000:63985999::	chr5:63,370,000-63,985,999 (616Mb, 5q12.3)	CNVR	5	63370000	63985999	N:GEXP:TCOF1:chr5:149737202:149779871:+:6949	TCOF1	GEXP	5	149737202	149779871	85751203	2.4	9.5	0.65	76
N:GEXP:PWWP2A:chr5:159488808:159546430:-:114825	PWWP2A	GEXP	5	159488808	159546430	N:GEXP:TCOF1:chr5:149737202:149779871:+:6949	TCOF1	GEXP	5	149737202	149779871	9708937	1.2	9.3	0.63	78
N:CNVR:5p12:chr5:40372000:45378999::	chr5:40,372,000-45,378,999 (5bp, 5p12)	CNVR	5	40372000	45378999	N:GEXP:TCOF1:chr5:149737202:149779871:+:6949	TCOF1	GEXP	5	149737202	149779871	104358203	1.9	9.1	0.63	76
N:CNVR:5q35:chr5:170017000:176813999::	chr5:170,017,000-176,813,999 (7bp, 5q35)	CNVR	5	170017000	176813999	N:GEXP:TCOF1:chr5:149737202:149779871:+:6949	TCOF1	GEXP	5	149737202	149779871	20237129	1.8	9	0.63	76
N:CNVR:5q35.3:chr5:176814000:180360000::	chr5:176,814,000-180,360,000 (4bp, 5q35.3)	CNVR	5	176814000	180360000	N:GEXP:TCOF1:chr5:149737202:149779871:+:6949	TCOF1	GEXP	5	149737202	149779871	27034129	1.8	9	0.63	76
N:CNVR:5q21.1:chr5:100130000:101722999::	chr5:100,130,000-101,722,999 (2bp, 5q21.1)	CNVR	5	100130000	101722999	N:GEXP:TCOF1:chr5:149737202:149779871:+:6949	TCOF1	GEXP	5	149737202	149779871	48014203	1.7	8.9	0.63	76
N:GEXP:TCOF1:chr5:149737202:149779871:+:6949	TCOF1	GEXP	5	149737202	149779871	N:METH:SCAMP1:chr5:77659524:::cg09048128_Body_SShelf	SCAMP1 (Body, SShelf) cg09048128	METH	5	77659524		72077678	0.1	8.8	0.62	78
N:GEXP:PCDHGC5:chr5:140868808:140892546:+:56097	PCDHGC5	GEXP	5	140868808	140892546	N:GEXP:TCOF1:chr5:149737202:149779871:+:6949	TCOF1	GEXP	5	149737202	149779871	8844656	0.5	8.7	0.62	78
N:GEXP:TCOF1:chr5:149737202:149779871:+:6949	TCOF1	GEXP	5	149737202	149779871	N:METH:APOA1:chr11:116708299:::cg03010018_5pUTR_SShore	APOA1 (5pUTR, SShore) cg03010018	METH	11	116708299		500000000	0	8.6	0.61	78
N:GEXP:TCOF1:chr5:149737202:149779871:+:6949	TCOF1	GEXP	5	149737202	149779871	N:GEXP:ZCCHC9:chr5:80597409:80609116:+:84240	ZCCHC9	GEXP	5	80597409	80609116	69128086	0.4	8.6	0.61	78
N:GEXP:TCOF1:chr5:149737202:149779871:+:6949	TCOF1	GEXP	5	149737202	149779871	N:GEXP:UTP14A:chrX:129040097:129063737:+:10813	UTP14A	GEXP	X	129040097	129063737	500000000	0.4	8.6	0.61	78
N:CNVR:5q33.3:chr5:158687000:159609999::	chr5:158,687,000-159,609,999 (923Mb, 5q33.3)	CNVR	5	158687000	159609999	N:GEXP:TCOF1:chr5:149737202:149779871:+:6949	TCOF1	GEXP	5	149737202	149779871	8907129	1.4	8.6	0.62	76
N:GEXP:PDZD11:chrX:69506445:69510364:-:51248	PDZD11	GEXP	X	69506445	69510364	N:GEXP:TCOF1:chr5:149737202:149779871:+:6949	TCOF1	GEXP	5	149737202	149779871	500000000	0.5	8.6	0.61	78
N:GEXP:MSH3:chr5:79950467:80172279:+:4437	MSH3	GEXP	5	79950467	80172279	N:GEXP:TCOF1:chr5:149737202:149779871:+:6949	TCOF1	GEXP	5	149737202	149779871	69564923	0.4	8.6	0.61	78
N:CNVR:5p11:chr5:45379000:50123999::	chr5:45,379,000-50,123,999 (5bp, 5p11)	CNVR	5	45379000	50123999	N:GEXP:TCOF1:chr5:149737202:149779871:+:6949	TCOF1	GEXP	5	149737202	149779871	99613203	1.4	8.6	0.66	66
N:CNVR:5q22.1:chr5:108928000:111758999::	chr5:108,928,000-111,758,999 (3bp, 5q22.1)	CNVR	5	108928000	111758999	N:GEXP:TCOF1:chr5:149737202:149779871:+:6949	TCOF1	GEXP	5	149737202	149779871	37978203	1.3	8.5	0.62	76
N:GEXP:LAS1L:chrX:64732462:64754655:-:81887	LAS1L	GEXP	X	64732462	64754655	N:GEXP:TCOF1:chr5:149737202:149779871:+:6949	TCOF1	GEXP	5	149737202	149779871	500000000	0.3	8.5	0.61	78
N:GEXP:SREK1:chr5:65440085:65476714:+:140890	SREK1	GEXP	5	65440085	65476714	N:GEXP:TCOF1:chr5:149737202:149779871:+:6949	TCOF1	GEXP	5	149737202	149779871	84260488	0.2	8.4	0.61	78
N:GEXP:TCOF1:chr5:149737202:149779871:+:6949	TCOF1	GEXP	5	149737202	149779871	N:METH:5q14.1:chr5:78906004:::cg27368538_NShelf	5q14.1 (NShelf) cg27368538	METH	5	78906004		70831198	0	8.3	0.6	78
N:GEXP:TAF7:chr5:140698057:140700330:-:6879	TAF7	GEXP	5	140698057	140700330	N:GEXP:TCOF1:chr5:149737202:149779871:+:6949	TCOF1	GEXP	5	149737202	149779871	9036872	0.1	8.2	0.6	78
N:GEXP:DCTN4:chr5:150088002:150138671:-:51164	DCTN4	GEXP	5	150088002	150138671	N:GEXP:TCOF1:chr5:149737202:149779871:+:6949	TCOF1	GEXP	5	149737202	149779871	308131	0.1	8.2	0.6	78
N:GEXP:FGFR1:chr8:38268656:38326352:-:2260	FGFR1	GEXP	8	38268656	38326352	N:GEXP:TCOF1:chr5:149737202:149779871:+:6949	TCOF1	GEXP	5	149737202	149779871	500000000	0	8.1	0.6	78
N:GEXP:MECP2:chrX:153287024:153363212:-:4204	MECP2	GEXP	X	153287024	153363212	N:GEXP:TCOF1:chr5:149737202:149779871:+:6949	TCOF1	GEXP	5	149737202	149779871	500000000	0	8.1	0.6	78
N:CNVR:5p14.1:chr5:25078000:25567999::	chr5:25,078,000-25,567,999 (490Mb, 5p14.1)	CNVR	5	25078000	25567999	N:GEXP:TCOF1:chr5:149737202:149779871:+:6949	TCOF1	GEXP	5	149737202	149779871	124169203	0.9	8.1	0.6	76
N:GEXP:SSBP2:chr5:80708840:81047616:-:23635	SSBP2	GEXP	5	80708840	81047616	N:GEXP:TCOF1:chr5:149737202:149779871:+:6949	TCOF1	GEXP	5	149737202	149779871	68689586	0	8.1	0.6	78
N:GEXP:SLC35A4:chr5:139944041:139948688:+:113829	SLC35A4	GEXP	5	139944041	139948688	N:GEXP:TCOF1:chr5:149737202:149779871:+:6949	TCOF1	GEXP	5	149737202	149779871	9788514	0	8.1	0.6	78
N:GEXP:TCOF1:chr5:149737202:149779871:+:6949	TCOF1	GEXP	5	149737202	149779871	N:GEXP:ZNF423:chr16:49521435:49891830:-:23090	ZNF423	GEXP	16	49521435	49891830	500000000	0	8	0.59	78
N:GEXP:SCAMP1:chr5:77656339:77776562:+:9522	SCAMP1	GEXP	5	77656339	77776562	N:GEXP:TCOF1:chr5:149737202:149779871:+:6949	TCOF1	GEXP	5	149737202	149779871	71960640	0	8	0.59	78
N:CNVR:5q21.3:chr5:107449000:107485999::	chr5:107,449,000-107,485,999 (37Mb, 5q21.3)	CNVR	5	107449000	107485999	N:GEXP:TCOF1:chr5:149737202:149779871:+:6949	TCOF1	GEXP	5	149737202	149779871	42251203	0.8	8	0.6	76
N:CNVR:5q21.3:chr5:107486000:108150999::	chr5:107,486,000-108,150,999 (665Mb, 5q21.3)	CNVR	5	107486000	108150999	N:GEXP:TCOF1:chr5:149737202:149779871:+:6949	TCOF1	GEXP	5	149737202	149779871	41586203	0.8	8	0.6	76
N:CNVR:5q21.1:chr5:99563000:100129999::	chr5:99,563,000-100,129,999 (567Mb, 5q21.1)	CNVR	5	99563000	100129999	N:GEXP:TCOF1:chr5:149737202:149779871:+:6949	TCOF1	GEXP	5	149737202	149779871	49607203	0.8	8	0.6	76
N:GEXP:HARS:chr5:140052758:140071609:-:3035	HARS	GEXP	5	140052758	140071609	N:GEXP:TCOF1:chr5:149737202:149779871:+:6949	TCOF1	GEXP	5	149737202	149779871	9665593	0	8	0.59	78
N:GEXP:TCOF1:chr5:149737202:149779871:+:6949	TCOF1	GEXP	5	149737202	149779871	N:SAMP:CIN_arm_amp:::::	CIN_arm_amp	SAMP				500000000	2.3	8	0.6	76
N:CNVR:5q21.1:chr5:98271000:99562999::	chr5:98,271,000-99,562,999 (1bp, 5q21.1)	CNVR	5	98271000	99562999	N:GEXP:TCOF1:chr5:149737202:149779871:+:6949	TCOF1	GEXP	5	149737202	149779871	50174203	0.7	7.9	0.6	76
N:CNVR:5q21.3:chr5:108151000:108927999::	chr5:108,151,000-108,927,999 (777Mb, 5q21.3)	CNVR	5	108151000	108927999	N:GEXP:TCOF1:chr5:149737202:149779871:+:6949	TCOF1	GEXP	5	149737202	149779871	40809203	0.8	7.9	0.6	76
N:GEXP:CALB1:chr8:91070836:91107703:-:793	CALB1	GEXP	8	91070836	91107703	N:GEXP:TCOF1:chr5:149737202:149779871:+:6949	TCOF1	GEXP	5	149737202	149779871	500000000	0	7.9	0.59	78
N:CNVR:5p13.1:chr5:38694000:40371999::	chr5:38,694,000-40,371,999 (2bp, 5p13.1)	CNVR	5	38694000	40371999	N:GEXP:TCOF1:chr5:149737202:149779871:+:6949	TCOF1	GEXP	5	149737202	149779871	109365203	0.7	7.9	0.6	76
N:GEXP:TCOF1:chr5:149737202:149779871:+:6949	TCOF1	GEXP	5	149737202	149779871	N:SAMP:CIN_arm_tot:::::	CIN_arm_tot	SAMP				500000000	2	7.8	0.59	76
N:GEXP:TCOF1:chr5:149737202:149779871:+:6949	TCOF1	GEXP	5	149737202	149779871	N:GEXP:TSR2:chrX:54466834:54471920:+:90121	TSR2	GEXP	X	54466834	54471920	500000000	0	7.7	0.58	78
N:GEXP:PAPD4:chr5:78907943:78982471:+:167153	PAPD4	GEXP	5	78907943	78982471	N:GEXP:TCOF1:chr5:149737202:149779871:+:6949	TCOF1	GEXP	5	149737202	149779871	70754731	0	7.7	0.58	78
N:GEXP:PHF8:chrX:53963109:54075391:-:23133	PHF8	GEXP	X	53963109	54075391	N:GEXP:TCOF1:chr5:149737202:149779871:+:6949	TCOF1	GEXP	5	149737202	149779871	500000000	0	7.7	0.59	78
N:GEXP:C5orf43:chr5:60453536:60458302:-:643155	C5orf43	GEXP	5	60453536	60458302	N:GEXP:TCOF1:chr5:149737202:149779871:+:6949	TCOF1	GEXP	5	149737202	149779871	89278900	0	7.6	0.58	78
N:GEXP:ALG13:chrX:110909043:111003877:+:79868	ALG13	GEXP	X	110909043	111003877	N:GEXP:TCOF1:chr5:149737202:149779871:+:6949	TCOF1	GEXP	5	149737202	149779871	500000000	0	7.6	0.58	78
N:GEXP:RBM41:chrX:106307650:106362057:-:55285	RBM41	GEXP	X	106307650	106362057	N:GEXP:TCOF1:chr5:149737202:149779871:+:6949	TCOF1	GEXP	5	149737202	149779871	500000000	0	7.6	0.58	78
N:CNVR:5q22.2:chr5:111759000:112083999::	chr5:111,759,000-112,083,999 (325Mb, 5q22.2)	CNVR	5	111759000	112083999	N:GEXP:TCOF1:chr5:149737202:149779871:+:6949	TCOF1	GEXP	5	149737202	149779871	37653203	0.4	7.6	0.59	76
N:GEXP:PPP2CA:chr5:133530025:133561833:-:5515	PPP2CA	GEXP	5	133530025	133561833	N:GEXP:TCOF1:chr5:149737202:149779871:+:6949	TCOF1	GEXP	5	149737202	149779871	16175369	0	7.6	0.58	78
N:GEXP:TCOF1:chr5:149737202:149779871:+:6949	TCOF1	GEXP	5	149737202	149779871	N:GEXP:ZCCHC10:chr5:132332677:132362296:-:54819	ZCCHC10	GEXP	5	132332677	132362296	17374906	0	7.5	0.58	78
N:GEXP:KLRAP1:chr12:10741077:10752434:-:10748	KLRAP1	GEXP	12	10741077	10752434	N:GEXP:TCOF1:chr5:149737202:149779871:+:6949	TCOF1	GEXP	5	149737202	149779871	500000000	0	7.5	0.58	78
N:CNVR:5q35.1:chr5:170012000:170015999::	chr5:170,012,000-170,015,999 (4Mb, 5q35.1)	CNVR	5	170012000	170015999	N:GEXP:TCOF1:chr5:149737202:149779871:+:6949	TCOF1	GEXP	5	149737202	149779871	20232129	0.3	7.5	0.58	76
N:GEXP:TCOF1:chr5:149737202:149779871:+:6949	TCOF1	GEXP	5	149737202	149779871	N:GEXP:TOP1P1:chr1:171314244:171314446:-:7151	TOP1P1	GEXP	1	171314244	171314446	500000000	0	7.4	0.57	78
N:CNVR:5q22.2:chr5:112085000:112937999::	chr5:112,085,000-112,937,999 (853Mb, 5q22.2)	CNVR	5	112085000	112937999	N:GEXP:TCOF1:chr5:149737202:149779871:+:6949	TCOF1	GEXP	5	149737202	149779871	36799203	0.2	7.4	0.58	76
N:GEXP:TCOF1:chr5:149737202:149779871:+:6949	TCOF1	GEXP	5	149737202	149779871	N:GEXP:VMA21:chrX:150564987:150577836:+:203547	VMA21	GEXP	X	150564987	150577836	500000000	0	7.3	0.57	78
N:GEXP:NHP2:chr5:177576461:177580968:-:55651	NHP2	GEXP	5	177576461	177580968	N:GEXP:TCOF1:chr5:149737202:149779871:+:6949	TCOF1	GEXP	5	149737202	149779871	27796590	0	7.3	0.57	78
N:GEXP:PCDHGC3:chr5:140855580:140892542:+:5098	PCDHGC3	GEXP	5	140855580	140892542	N:GEXP:TCOF1:chr5:149737202:149779871:+:6949	TCOF1	GEXP	5	149737202	149779871	8844660	0	7.3	0.57	78
N:CNVR:16p12.2:chr16:23959000:23964999::	chr16:23,959,000-23,964,999 (6Mb, 16p12.2)	CNVR	16	23959000	23964999	N:GEXP:TCOF1:chr5:149737202:149779871:+:6949	TCOF1	GEXP	5	149737202	149779871	500000000	0.1	7.3	0.58	76
N:GEXP:RGAG4:chrX:71346958:71351758:-:340526	RGAG4	GEXP	X	71346958	71351758	N:GEXP:TCOF1:chr5:149737202:149779871:+:6949	TCOF1	GEXP	5	149737202	149779871	500000000	0	7.3	0.57	78
N:CNVR:5p13.2:chr5:35843000:35843999::	chr5:35,843,000-35,843,999 (100kb, 5p13.2)	CNVR	5	35843000	35843999	N:GEXP:TCOF1:chr5:149737202:149779871:+:6949	TCOF1	GEXP	5	149737202	149779871	113893203	0.1	7.3	0.58	75
N:GEXP:TCOF1:chr5:149737202:149779871:+:6949	TCOF1	GEXP	5	149737202	149779871	B:SAMP:I(Chromosomal|SCNA_CLS):::::fromMasterTable	SCNA_CLS Chromosomal	SAMP				500000000	1.5	7.3	0.63	76
N:GEXP:TCOF1:chr5:149737202:149779871:+:6949	TCOF1	GEXP	5	149737202	149779871	N:SAMP:CIN_arm_del:::::	CIN_arm_del	SAMP				500000000	1.5	7.3	0.58	76
N:GEXP:TCOF1:chr5:149737202:149779871:+:6949	TCOF1	GEXP	5	149737202	149779871	N:GEXP:TMEM167A:chr5:82348665:82373682:-:153339	TMEM167A	GEXP	5	82348665	82373682	67363520	0	7.2	0.57	78
N:GEXP:COMMD10:chr5:115420688:115748459:+:51397	COMMD10	GEXP	5	115420688	115748459	N:GEXP:TCOF1:chr5:149737202:149779871:+:6949	TCOF1	GEXP	5	149737202	149779871	33988743	0	7.2	0.57	78
N:GEXP:CETN3:chr5:89688078:89705603:-:1070	CETN3	GEXP	5	89688078	89705603	N:GEXP:TCOF1:chr5:149737202:149779871:+:6949	TCOF1	GEXP	5	149737202	149779871	60031599	0	7.2	0.57	78
N:GEXP:MAGED2:chrX:54834032:54842445:+:10916	MAGED2	GEXP	X	54834032	54842445	N:GEXP:TCOF1:chr5:149737202:149779871:+:6949	TCOF1	GEXP	5	149737202	149779871	500000000	0	7.2	0.57	78
N:GEXP:KIAA0556:chr16:27561454:27791690:+:23247	KIAA0556	GEXP	16	27561454	27791690	N:GEXP:TCOF1:chr5:149737202:149779871:+:6949	TCOF1	GEXP	5	149737202	149779871	500000000	0	7.2	0.57	78
N:GEXP:STX1A:chr7:73113536:73134002:-:6804	STX1A	GEXP	7	73113536	73134002	N:GEXP:TCOF1:chr5:149737202:149779871:+:6949	TCOF1	GEXP	5	149737202	149779871	500000000	0	7.2	0.57	78
N:GEXP:TCOF1:chr5:149737202:149779871:+:6949	TCOF1	GEXP	5	149737202	149779871	N:METH:5q31.3:chr5:142611958:::cg18590053	5q31.3 cg18590053	METH	5	142611958		7125244	0	7.1	0.56	78
N:GEXP:CDK7:chr5:68530668:68573250:+:1022	CDK7	GEXP	5	68530668	68573250	N:GEXP:TCOF1:chr5:149737202:149779871:+:6949	TCOF1	GEXP	5	149737202	149779871	81163952	0	7.1	0.56	78
N:GEXP:PINX1:chr8:10622473:10697394:-:54984	PINX1	GEXP	8	10622473	10697394	N:GEXP:TCOF1:chr5:149737202:149779871:+:6949	TCOF1	GEXP	5	149737202	149779871	500000000	0	7.1	0.56	78
N:CNVR:5p13.1:chr5:38693000:38693999::	chr5:38,693,000-38,693,999 (100kb, 5p13.1)	CNVR	5	38693000	38693999	N:GEXP:TCOF1:chr5:149737202:149779871:+:6949	TCOF1	GEXP	5	149737202	149779871	111043203	0	7	0.57	76
N:GEXP:TCOF1:chr5:149737202:149779871:+:6949	TCOF1	GEXP	5	149737202	149779871	N:GEXP:YTHDC2:chr5:112849380:112930982:+:64848	YTHDC2	GEXP	5	112849380	112930982	36806220	0	6.9	0.56	78
N:GEXP:RBM19:chr12:114254543:114404176:-:9904	RBM19	GEXP	12	114254543	114404176	N:GEXP:TCOF1:chr5:149737202:149779871:+:6949	TCOF1	GEXP	5	149737202	149779871	500000000	0	6.9	0.56	78
N:GEXP:EMD:chrX:153607557:153609883:+:2010	EMD	GEXP	X	153607557	153609883	N:GEXP:TCOF1:chr5:149737202:149779871:+:6949	TCOF1	GEXP	5	149737202	149779871	500000000	0	6.9	0.56	78
N:CNVR:5p14.1:chr5:25970000:28228999::	chr5:25,970,000-28,228,999 (2bp, 5p14.1)	CNVR	5	25970000	28228999	N:GEXP:TCOF1:chr5:149737202:149779871:+:6949	TCOF1	GEXP	5	149737202	149779871	121508203	0	6.9	0.56	76
N:GEXP:HMGXB3:chr5:149379884:149432386:+:22993	HMGXB3	GEXP	5	149379884	149432386	N:GEXP:TCOF1:chr5:149737202:149779871:+:6949	TCOF1	GEXP	5	149737202	149779871	304816	0	6.9	0.56	78
N:CNVR:5q35.3:chr5:176797344:176832557::ACC-TP_Gistic_ROI_r_amp	5q35.3 Amplification (Gistic, continuous)	CNVR	5	176797344	176832557	N:GEXP:TCOF1:chr5:149737202:149779871:+:6949	TCOF1	GEXP	5	149737202	149779871	27017473	0	6.9	0.56	76
N:GEXP:TCOF1:chr5:149737202:149779871:+:6949	TCOF1	GEXP	5	149737202	149779871	N:METH:C5orf43:chr5:60459327:::cg02332500_TSS1500_SShore	C5orf43 (TSS1500, SShore) cg02332500	METH	5	60459327		89277875	0	6.8	0.55	78
N:GEXP:MORF4L2:chrX:102930424:102943086:-:9643	MORF4L2	GEXP	X	102930424	102943086	N:GEXP:TCOF1:chr5:149737202:149779871:+:6949	TCOF1	GEXP	5	149737202	149779871	500000000	0	6.8	0.55	78
N:CNVR:16q11.2:chr16:31851000:46506999::	chr16:31,851,000-46,506,999 (15bp, 16q11.2)	CNVR	16	31851000	46506999	N:GEXP:TCOF1:chr5:149737202:149779871:+:6949	TCOF1	GEXP	5	149737202	149779871	500000000	0	6.8	0.58	70
N:GEXP:SPEF2:chr5:35617946:35814713:+:79925	SPEF2	GEXP	5	35617946	35814713	N:GEXP:TCOF1:chr5:149737202:149779871:+:6949	TCOF1	GEXP	5	149737202	149779871	113922489	0	6.8	0.55	78
N:GEXP:C16orf70:chr16:67143861:67182442:+:80262	C16orf70	GEXP	16	67143861	67182442	N:GEXP:TCOF1:chr5:149737202:149779871:+:6949	TCOF1	GEXP	5	149737202	149779871	500000000	0	6.8	0.55	78
N:GEXP:PHF15:chr5:133860003:133918918:+:23338	PHF15	GEXP	5	133860003	133918918	N:GEXP:TCOF1:chr5:149737202:149779871:+:6949	TCOF1	GEXP	5	149737202	149779871	15818284	0	6.8	0.55	78
N:GEXP:TCOF1:chr5:149737202:149779871:+:6949	TCOF1	GEXP	5	149737202	149779871	N:GEXP:TTLL9:chr20:30458505:30532764:+:164395	TTLL9	GEXP	20	30458505	30532764	500000000	0	6.7	0.55	78
N:GEXP:TCOF1:chr5:149737202:149779871:+:6949	TCOF1	GEXP	5	149737202	149779871	N:METH:HOXB7:chr17:46687312:::cg22502153_Body_NShore	HOXB7 (Body, NShore) cg22502153	METH	17	46687312		500000000	0	6.7	0.55	78
N:GEXP:PPWD1:chr5:64859063:64883376:+:23398	PPWD1	GEXP	5	64859063	64883376	N:GEXP:TCOF1:chr5:149737202:149779871:+:6949	TCOF1	GEXP	5	149737202	149779871	84853826	0	6.7	0.55	78
N:CNVR:5q22.3:chr5:114756000:114756999::	chr5:114,756,000-114,756,999 (100kb, 5q22.3)	CNVR	5	114756000	114756999	N:GEXP:TCOF1:chr5:149737202:149779871:+:6949	TCOF1	GEXP	5	149737202	149779871	34980203	0	6.7	0.56	76
N:CNVR:5p13:chr5:29126000:35259999::	chr5:29,126,000-35,259,999 (6bp, 5p13)	CNVR	5	29126000	35259999	N:GEXP:TCOF1:chr5:149737202:149779871:+:6949	TCOF1	GEXP	5	149737202	149779871	114477203	0	6.7	0.56	76
N:CNVR:16p12.2:chr16:23864000:23865999::	chr16:23,864,000-23,865,999 (2Mb, 16p12.2)	CNVR	16	23864000	23865999	N:GEXP:TCOF1:chr5:149737202:149779871:+:6949	TCOF1	GEXP	5	149737202	149779871	500000000	0	6.7	0.56	76
N:GEXP:NKRF:chrX:118722300:118739858:-:55922	NKRF	GEXP	X	118722300	118739858	N:GEXP:TCOF1:chr5:149737202:149779871:+:6949	TCOF1	GEXP	5	149737202	149779871	500000000	0	6.7	0.55	78
N:GEXP:FAM13B:chr5:137273649:137387650:-:51306	FAM13B	GEXP	5	137273649	137387650	N:GEXP:TCOF1:chr5:149737202:149779871:+:6949	TCOF1	GEXP	5	149737202	149779871	12349552	0	6.7	0.55	78
N:GEXP:HYDIN:chr16:70841281:71264625:-:54768	HYDIN	GEXP	16	70841281	71264625	N:GEXP:TCOF1:chr5:149737202:149779871:+:6949	TCOF1	GEXP	5	149737202	149779871	500000000	0	6.7	0.55	78
N:GEXP:TCOF1:chr5:149737202:149779871:+:6949	TCOF1	GEXP	5	149737202	149779871	N:GEXP:ZC3H18:chr16:88636789:88698374:+:124245	ZC3H18	GEXP	16	88636789	88698374	500000000	0	6.6	0.55	78
N:CNVR:5p14.1:chr5:28229000:29075999::	chr5:28,229,000-29,075,999 (847Mb, 5p14.1)	CNVR	5	28229000	29075999	N:GEXP:TCOF1:chr5:149737202:149779871:+:6949	TCOF1	GEXP	5	149737202	149779871	120661203	0	6.6	0.55	76
N:GEXP:SLC10A3:chrX:153715645:153719016:-:8273	SLC10A3	GEXP	X	153715645	153719016	N:GEXP:TCOF1:chr5:149737202:149779871:+:6949	TCOF1	GEXP	5	149737202	149779871	500000000	0	6.6	0.55	78
N:GEXP:TCOF1:chr5:149737202:149779871:+:6949	TCOF1	GEXP	5	149737202	149779871	N:METH:MRPS27:chr5:71613149:::cg26293423_Body_NShelf	MRPS27 (Body, NShelf) cg26293423	METH	5	71613149		78124053	0	6.5	0.54	78
N:GEXP:TCOF1:chr5:149737202:149779871:+:6949	TCOF1	GEXP	5	149737202	149779871	N:METH:ATG10:chr5:81276552:::cg12438044_5pUTR	ATG10 (5pUTR) cg12438044	METH	5	81276552		68460650	0	6.5	0.54	78
N:GEXP:SLU7:chr5:159828648:159848718:-:10569	SLU7	GEXP	5	159828648	159848718	N:GEXP:TCOF1:chr5:149737202:149779871:+:6949	TCOF1	GEXP	5	149737202	149779871	10048777	0	6.5	0.54	78
N:GEXP:GLB1L2:chr11:134201768:134248235:+:89944	GLB1L2	GEXP	11	134201768	134248235	N:GEXP:TCOF1:chr5:149737202:149779871:+:6949	TCOF1	GEXP	5	149737202	149779871	500000000	0	6.5	0.54	78
N:GEXP:IK:chr5:140026643:140042064:+:3550	IK	GEXP	5	140026643	140042064	N:GEXP:TCOF1:chr5:149737202:149779871:+:6949	TCOF1	GEXP	5	149737202	149779871	9695138	0	6.5	0.54	78
N:GEXP:MTMR1:chrX:149861435:149933576:+:8776	MTMR1	GEXP	X	149861435	149933576	N:GEXP:TCOF1:chr5:149737202:149779871:+:6949	TCOF1	GEXP	5	149737202	149779871	500000000	0	6.5	0.54	78
N:GEXP:C5orf28:chr5:43444354:43483995:-:64417	C5orf28	GEXP	5	43444354	43483995	N:GEXP:TCOF1:chr5:149737202:149779871:+:6949	TCOF1	GEXP	5	149737202	149779871	106253207	0	6.5	0.54	78
N:GEXP:TCOF1:chr5:149737202:149779871:+:6949	TCOF1	GEXP	5	149737202	149779871	N:METH:AR:chrX:66763009:::cg25686125_TSS1500_NShore	AR (TSS1500, NShore) cg25686125	METH	X	66763009		500000000	0	6.4	0.54	78
N:GEXP:TCOF1:chr5:149737202:149779871:+:6949	TCOF1	GEXP	5	149737202	149779871	N:GEXP:TIGD6:chr5:149372681:149380730:-:81789	TIGD6	GEXP	5	149372681	149380730	356472	0	6.4	0.54	78
N:GEXP:TCOF1:chr5:149737202:149779871:+:6949	TCOF1	GEXP	5	149737202	149779871	N:METH:TLCD1:chr17:27052828:::cg07195577_Body_NShore	TLCD1 (Body, NShore) cg07195577	METH	17	27052828		500000000	0	6.4	0.54	78
N:GEXP:PRRC1:chr5:126853301:126890781:+:133619	PRRC1	GEXP	5	126853301	126890781	N:GEXP:TCOF1:chr5:149737202:149779871:+:6949	TCOF1	GEXP	5	149737202	149779871	22846421	0	6.4	0.54	78
N:GEXP:MAPK9:chr5:179660143:179719099:-:5601	MAPK9	GEXP	5	179660143	179719099	N:GEXP:TCOF1:chr5:149737202:149779871:+:6949	TCOF1	GEXP	5	149737202	149779871	29880272	0	6.4	0.54	78
N:GEXP:KDM3B:chr5:137688285:137772717:+:51780	KDM3B	GEXP	5	137688285	137772717	N:GEXP:TCOF1:chr5:149737202:149779871:+:6949	TCOF1	GEXP	5	149737202	149779871	11964485	0	6.4	0.54	78
N:CNVR:16q:chr16:36600000:90354753::ACC-TP_GisticArm_d	16q (Gistic Arm)	CNVR	16	36600000	90354753	N:GEXP:TCOF1:chr5:149737202:149779871:+:6949	TCOF1	GEXP	5	149737202	149779871	500000000	0	6.4	0.54	76
N:GEXP:DKC1:chrX:153991031:154005964:+:1736	DKC1	GEXP	X	153991031	154005964	N:GEXP:TCOF1:chr5:149737202:149779871:+:6949	TCOF1	GEXP	5	149737202	149779871	500000000	0	6.4	0.54	78
N:CNVR:16p:chr16:0:36600000::ACC-TP_GisticArm_d	16p (Gistic Arm)	CNVR	16	0	36600000	N:GEXP:TCOF1:chr5:149737202:149779871:+:6949	TCOF1	GEXP	5	149737202	149779871	500000000	0	6.4	0.54	76
N:CNVR:5p14.1:chr5:25568000:25969999::	chr5:25,568,000-25,969,999 (402Mb, 5p14.1)	CNVR	5	25568000	25969999	N:GEXP:TCOF1:chr5:149737202:149779871:+:6949	TCOF1	GEXP	5	149737202	149779871	123767203	0	6.4	0.54	76
N:CNVR:16p12.2:chr16:23866000:23958999::	chr16:23,866,000-23,958,999 (93Mb, 16p12.2)	CNVR	16	23866000	23958999	N:GEXP:TCOF1:chr5:149737202:149779871:+:6949	TCOF1	GEXP	5	149737202	149779871	500000000	0	6.4	0.54	76
N:CNVR:16p12.1:chr16:23965000:31850999::	chr16:23,965,000-31,850,999 (8bp, 16p12.1)	CNVR	16	23965000	31850999	N:GEXP:TCOF1:chr5:149737202:149779871:+:6949	TCOF1	GEXP	5	149737202	149779871	500000000	0	6.4	0.54	76
N:GEXP:BRD8:chr5:137475455:137514675:-:10902	BRD8	GEXP	5	137475455	137514675	N:GEXP:TCOF1:chr5:149737202:149779871:+:6949	TCOF1	GEXP	5	149737202	149779871	12222527	0	6.4	0.54	78
N:CNVR:16p12:chr16:19351000:23863999::	chr16:19,351,000-23,863,999 (5bp, 16p12)	CNVR	16	19351000	23863999	N:GEXP:TCOF1:chr5:149737202:149779871:+:6949	TCOF1	GEXP	5	149737202	149779871	500000000	0	6.4	0.54	76
N:GEXP:TCOF1:chr5:149737202:149779871:+:6949	TCOF1	GEXP	5	149737202	149779871	N:GEXP:ZFYVE16:chr5:79703832:79775169:+:9765	ZFYVE16	GEXP	5	79703832	79775169	69962033	0	6.3	0.54	78
N:GEXP:ASB12:chrX:63444076:63450511:-:142689	ASB12	GEXP	X	63444076	63450511	N:GEXP:TCOF1:chr5:149737202:149779871:+:6949	TCOF1	GEXP	5	149737202	149779871	500000000	0	6.3	0.53	78
N:GEXP:GEMIN5:chr5:154266976:154317769:-:25929	GEMIN5	GEXP	5	154266976	154317769	N:GEXP:TCOF1:chr5:149737202:149779871:+:6949	TCOF1	GEXP	5	149737202	149779871	4487105	0	6.3	0.53	78
N:GEXP:PAK7:chr20:9518036:9819689:-:57144	PAK7	GEXP	20	9518036	9819689	N:GEXP:TCOF1:chr5:149737202:149779871:+:6949	TCOF1	GEXP	5	149737202	149779871	500000000	0	6.3	0.53	78
N:GEXP:RBM27:chr5:145583113:145718814:+:54439	RBM27	GEXP	5	145583113	145718814	N:GEXP:TCOF1:chr5:149737202:149779871:+:6949	TCOF1	GEXP	5	149737202	149779871	4018388	0	6.3	0.53	78
N:GEXP:CDC42SE2:chr5:130581186:130734140:+:56990	CDC42SE2	GEXP	5	130581186	130734140	N:GEXP:TCOF1:chr5:149737202:149779871:+:6949	TCOF1	GEXP	5	149737202	149779871	19003062	0	6.3	0.53	78
N:CNVR:16p12.3:chr16:19349000:19350999::	chr16:19,349,000-19,350,999 (2Mb, 16p12.3)	CNVR	16	19349000	19350999	N:GEXP:TCOF1:chr5:149737202:149779871:+:6949	TCOF1	GEXP	5	149737202	149779871	500000000	0	6.3	0.54	76
N:GEXP:MTMR8:chrX:63444187:63615333:-:55613	MTMR8	GEXP	X	63444187	63615333	N:GEXP:TCOF1:chr5:149737202:149779871:+:6949	TCOF1	GEXP	5	149737202	149779871	500000000	0	6.3	0.53	78
N:CNVR:5p14.3:chr5:22002000:22002999::	chr5:22,002,000-22,002,999 (100kb, 5p14.3)	CNVR	5	22002000	22002999	N:GEXP:TCOF1:chr5:149737202:149779871:+:6949	TCOF1	GEXP	5	149737202	149779871	127734203	0	6.3	0.55	74
N:CNVR:16q23.1:chr16:78129058:79247026::ACC-TP_Gistic_ROI_r_del	16q23.1 Deletion (Gistic, continuous)	CNVR	16	78129058	79247026	N:GEXP:TCOF1:chr5:149737202:149779871:+:6949	TCOF1	GEXP	5	149737202	149779871	500000000	0	6.3	0.54	76
N:CNVR:16p13.2:chr16:7588000:19348999::	chr16:7,588,000-19,348,999 (12bp, 16p13.2)	CNVR	16	7588000	19348999	N:GEXP:TCOF1:chr5:149737202:149779871:+:6949	TCOF1	GEXP	5	149737202	149779871	500000000	0	6.3	0.54	76
N:GEXP:TCOF1:chr5:149737202:149779871:+:6949	TCOF1	GEXP	5	149737202	149779871	N:GEXP:ZNF23:chr16:71481500:71496998:-:7571	ZNF23	GEXP	16	71481500	71496998	500000000	0	6.2	0.53	78
N:GEXP:TCOF1:chr5:149737202:149779871:+:6949	TCOF1	GEXP	5	149737202	149779871	N:MIRN:hsa-miR-378c:chr10:132760851:132760931:+:MIMAT0016847	hsa-miR-378c	MIRN	10	132760851	132760931	500000000	0	6.2	0.53	78
N:GEXP:TCOF1:chr5:149737202:149779871:+:6949	TCOF1	GEXP	5	149737202	149779871	N:GEXP:TTC33:chr5:40714577:40756077:-:23548	TTC33	GEXP	5	40714577	40756077	108981125	0	6.2	0.53	78
N:GEXP:TCOF1:chr5:149737202:149779871:+:6949	TCOF1	GEXP	5	149737202	149779871	N:METH:KAT5:chr11:65480045:::cg20768717_Body_SShore	KAT5 (Body, SShore) cg20768717	METH	11	65480045		500000000	0	6.2	0.53	78
N:GEXP:MCTS1:chrX:119727865:119754929:+:28985	MCTS1	GEXP	X	119727865	119754929	N:GEXP:TCOF1:chr5:149737202:149779871:+:6949	TCOF1	GEXP	5	149737202	149779871	500000000	0	6.2	0.53	78
N:GEXP:MIER3:chr5:56215429:56267502:-:166968	MIER3	GEXP	5	56215429	56267502	N:GEXP:TCOF1:chr5:149737202:149779871:+:6949	TCOF1	GEXP	5	149737202	149779871	93469700	0	6.2	0.53	78
N:GEXP:CCDC22:chrX:49091927:49106987:+:28952	CCDC22	GEXP	X	49091927	49106987	N:GEXP:TCOF1:chr5:149737202:149779871:+:6949	TCOF1	GEXP	5	149737202	149779871	500000000	0	6.2	0.53	78
N:GEXP:SPAG17:chr1:118496484:118727846:-:200162	SPAG17	GEXP	1	118496484	118727846	N:GEXP:TCOF1:chr5:149737202:149779871:+:6949	TCOF1	GEXP	5	149737202	149779871	500000000	0	6.2	0.53	78
N:GEXP:MRPS36:chr5:68513587:68525956:+:92259	MRPS36	GEXP	5	68513587	68525956	N:GEXP:TCOF1:chr5:149737202:149779871:+:6949	TCOF1	GEXP	5	149737202	149779871	81211246	0	6.2	0.53	78
N:CNVR:5q22.2:chr5:112084000:112084999::	chr5:112,084,000-112,084,999 (100kb, 5q22.2)	CNVR	5	112084000	112084999	N:GEXP:TCOF1:chr5:149737202:149779871:+:6949	TCOF1	GEXP	5	149737202	149779871	37652203	0	6.2	0.54	76
N:GEXP:SLC25A14:chrX:129473874:129507335:+:9016	SLC25A14	GEXP	X	129473874	129507335	N:GEXP:TCOF1:chr5:149737202:149779871:+:6949	TCOF1	GEXP	5	149737202	149779871	500000000	0	6.2	0.53	78
N:GEXP:CD40:chr20:44746911:44758502:+:958	CD40	GEXP	20	44746911	44758502	N:GEXP:TCOF1:chr5:149737202:149779871:+:6949	TCOF1	GEXP	5	149737202	149779871	500000000	0	6.2	0.53	78
N:GEXP:TCOF1:chr5:149737202:149779871:+:6949	TCOF1	GEXP	5	149737202	149779871	N:GEXP:ZNF84:chr12:133613878:133639885:+:7637	ZNF84	GEXP	12	133613878	133639885	500000000	0	6.1	0.52	78
N:GEXP:TCOF1:chr5:149737202:149779871:+:6949	TCOF1	GEXP	5	149737202	149779871	N:METH:PTPN23:chr3:47423585:::cg19986876_Body_SShore	PTPN23 (Body, SShore) cg19986876	METH	3	47423585		500000000	0	6.1	0.53	78
N:GEXP:TCOF1:chr5:149737202:149779871:+:6949	TCOF1	GEXP	5	149737202	149779871	N:METH:CHTF18:chr16:847887:::cg09351623_Body_NShelf	CHTF18 (Body, NShelf) cg09351623	METH	16	847887		500000000	0	6.1	0.53	78
N:GEXP:IFFO1:chr12:6647541:6665239:-:25900	IFFO1	GEXP	12	6647541	6665239	N:GEXP:TCOF1:chr5:149737202:149779871:+:6949	TCOF1	GEXP	5	149737202	149779871	500000000	0	6.1	0.52	78
N:GEXP:HSPB1:chr7:75931861:75933612:+:3315	HSPB1	GEXP	7	75931861	75933612	N:GEXP:TCOF1:chr5:149737202:149779871:+:6949	TCOF1	GEXP	5	149737202	149779871	500000000	0	6.1	0.53	78
N:GEXP:AGFG2:chr7:100136834:100165842:+:3268	AGFG2	GEXP	7	100136834	100165842	N:GEXP:TCOF1:chr5:149737202:149779871:+:6949	TCOF1	GEXP	5	149737202	149779871	500000000	0	6.1	0.53	78
N:GEXP:RBMX2:chrX:129535943:129547317:+:51634	RBMX2	GEXP	X	129535943	129547317	N:GEXP:TCOF1:chr5:149737202:149779871:+:6949	TCOF1	GEXP	5	149737202	149779871	500000000	0	6.1	0.53	78
N:GEXP:TCHP:chr12:110338069:110421646:+:84260	TCHP	GEXP	12	110338069	110421646	N:GEXP:TCOF1:chr5:149737202:149779871:+:6949	TCOF1	GEXP	5	149737202	149779871	500000000	0	6.1	0.53	78
N:GEXP:CYSTM1:chr5:139554653:139663119:+:84418	CYSTM1	GEXP	5	139554653	139663119	N:GEXP:TCOF1:chr5:149737202:149779871:+:6949	TCOF1	GEXP	5	149737202	149779871	10074083	0	6.1	0.53	78
N:GEXP:CTNNA1:chr5:137946656:138270723:+:1495	CTNNA1	GEXP	5	137946656	138270723	N:GEXP:TCOF1:chr5:149737202:149779871:+:6949	TCOF1	GEXP	5	149737202	149779871	11466479	0	6.1	0.53	78
N:GEXP:TCOF1:chr5:149737202:149779871:+:6949	TCOF1	GEXP	5	149737202	149779871	N:METH:MAST4:chr5:66459046:::cg27145409_Body_Island	MAST4 (Body, Island) cg27145409	METH	5	66459046		83278156	0	6	0.52	78
N:GEXP:TCOF1:chr5:149737202:149779871:+:6949	TCOF1	GEXP	5	149737202	149779871	N:METH:APOA1:chr11:116708329:::cg19324627_1stExon_SShore	APOA1 (1stExon, SShore) cg19324627	METH	11	116708329		500000000	0	6	0.52	78
N:GEXP:SPATS2:chr12:49760367:49921205:+:65244	SPATS2	GEXP	12	49760367	49921205	N:GEXP:TCOF1:chr5:149737202:149779871:+:6949	TCOF1	GEXP	5	149737202	149779871	500000000	0	6	0.52	78
N:GEXP:PSMD10:chrX:107327437:107334848:-:5716	PSMD10	GEXP	X	107327437	107334848	N:GEXP:TCOF1:chr5:149737202:149779871:+:6949	TCOF1	GEXP	5	149737202	149779871	500000000	0	6	0.52	78
N:GEXP:FUK:chr16:70488324:70514177:+:197258	FUK	GEXP	16	70488324	70514177	N:GEXP:TCOF1:chr5:149737202:149779871:+:6949	TCOF1	GEXP	5	149737202	149779871	500000000	0	6	0.52	78
N:CNVR:5p13.3:chr5:29076000:29125999::	chr5:29,076,000-29,125,999 (50Mb, 5p13.3)	CNVR	5	29076000	29125999	N:GEXP:TCOF1:chr5:149737202:149779871:+:6949	TCOF1	GEXP	5	149737202	149779871	120611203	0	6	0.53	76
N:GEXP:IDS:chrX:148558521:148615470:-:3423	IDS	GEXP	X	148558521	148615470	N:GEXP:TCOF1:chr5:149737202:149779871:+:6949	TCOF1	GEXP	5	149737202	149779871	500000000	0	6	0.52	78
N:CNVR:16q23.3:chr16:84140000:84144999::	chr16:84,140,000-84,144,999 (5Mb, 16q23.3)	CNVR	16	84140000	84144999	N:GEXP:TCOF1:chr5:149737202:149779871:+:6949	TCOF1	GEXP	5	149737202	149779871	500000000	0	6	0.53	76
N:CNVR:5p:chr5:0:48400000::ACC-TP_GisticArm_d	5p (Gistic Arm)	CNVR	5	0	48400000	N:GEXP:TCOF1:chr5:149737202:149779871:+:6949	TCOF1	GEXP	5	149737202	149779871	101337202	0	5.9	0.52	76
N:CNVR:16q22.2:chr16:71402000:74547999::	chr16:71,402,000-74,547,999 (3bp, 16q22.2)	CNVR	16	71402000	74547999	N:GEXP:TCOF1:chr5:149737202:149779871:+:6949	TCOF1	GEXP	5	149737202	149779871	500000000	0	5.9	0.52	76
N:CNVR:5p13:chr5:35868000:38692999::	chr5:35,868,000-38,692,999 (3bp, 5p13)	CNVR	5	35868000	38692999	N:GEXP:TCOF1:chr5:149737202:149779871:+:6949	TCOF1	GEXP	5	149737202	149779871	111044203	0	5.9	0.52	76
N:CNVR:5p14.3:chr5:19150000:21066999::	chr5:19,150,000-21,066,999 (2bp, 5p14.3)	CNVR	5	19150000	21066999	N:GEXP:TCOF1:chr5:149737202:149779871:+:6949	TCOF1	GEXP	5	149737202	149779871	128670203	0	5.8	0.52	76
N:CNVR:5p13.2:chr5:35844000:35865999::	chr5:35,844,000-35,865,999 (22Mb, 5p13.2)	CNVR	5	35844000	35865999	N:GEXP:TCOF1:chr5:149737202:149779871:+:6949	TCOF1	GEXP	5	149737202	149779871	113871203	0	5.8	0.52	76
N:CNVR:5p13.2:chr5:35756000:35841999::	chr5:35,756,000-35,841,999 (86Mb, 5p13.2)	CNVR	5	35756000	35841999	N:GEXP:TCOF1:chr5:149737202:149779871:+:6949	TCOF1	GEXP	5	149737202	149779871	113895203	0	5.8	0.52	76
N:CNVR:16q12.2:chr16:55453000:55972999::	chr16:55,453,000-55,972,999 (520Mb, 16q12.2)	CNVR	16	55453000	55972999	N:GEXP:TCOF1:chr5:149737202:149779871:+:6949	TCOF1	GEXP	5	149737202	149779871	500000000	0	5.8	0.52	76
N:CNVR:12p12.1:chr12:25976000:25982999::	chr12:25,976,000-25,982,999 (7Mb, 12p12.1)	CNVR	12	25976000	25982999	N:GEXP:TCOF1:chr5:149737202:149779871:+:6949	TCOF1	GEXP	5	149737202	149779871	500000000	0	5.8	0.52	76
N:CNVR:5p13.2:chr5:35866000:35867999::	chr5:35,866,000-35,867,999 (2Mb, 5p13.2)	CNVR	5	35866000	35867999	N:GEXP:TCOF1:chr5:149737202:149779871:+:6949	TCOF1	GEXP	5	149737202	149779871	113869203	0	5.8	0.52	76
N:CNVR:5p13.2:chr5:35842000:35842999::	chr5:35,842,000-35,842,999 (100kb, 5p13.2)	CNVR	5	35842000	35842999	N:GEXP:TCOF1:chr5:149737202:149779871:+:6949	TCOF1	GEXP	5	149737202	149779871	113894203	0	5.8	0.52	76
N:CNVR:16p13.3:chr16:653000:7365999::	chr16:653,000-7,365,999 (7bp, 16p13.3)	CNVR	16	653000	7365999	N:GEXP:TCOF1:chr5:149737202:149779871:+:6949	TCOF1	GEXP	5	149737202	149779871	500000000	0	5.8	0.52	76
N:CNVR:16q12.2:chr16:55973000:55994999::	chr16:55,973,000-55,994,999 (22Mb, 16q12.2)	CNVR	16	55973000	55994999	N:GEXP:TCOF1:chr5:149737202:149779871:+:6949	TCOF1	GEXP	5	149737202	149779871	500000000	0	5.8	0.52	76
N:CNVR:5p14.3:chr5:21613000:21616999::	chr5:21,613,000-21,616,999 (4Mb, 5p14.3)	CNVR	5	21613000	21616999	N:GEXP:TCOF1:chr5:149737202:149779871:+:6949	TCOF1	GEXP	5	149737202	149779871	128120203	0	5.8	0.52	75
N:CNVR:16q12.2:chr16:55451000:55452999::	chr16:55,451,000-55,452,999 (2Mb, 16q12.2)	CNVR	16	55451000	55452999	N:GEXP:TCOF1:chr5:149737202:149779871:+:6949	TCOF1	GEXP	5	149737202	149779871	500000000	0	5.8	0.52	76
N:CNVR:16q24.1:chr16:84145000:87304999::	chr16:84,145,000-87,304,999 (3bp, 16q24.1)	CNVR	16	84145000	87304999	N:GEXP:TCOF1:chr5:149737202:149779871:+:6949	TCOF1	GEXP	5	149737202	149779871	500000000	0	5.7	0.51	76

## Sheet: BLCA
id_a	pretty_label_a	datatype_a	chr_a	start_a	end_a	id_b	pretty_label_b	datatype_b	chr_b	start_b	end_b	link_distance	adj_logged_pvalue	logged_pvalue	correlation	num_nonna
N:GEXP:PTTG1:chr5:159848865:159855746:+:9232	PTTG1	GEXP	5	159848865	159855746	N:GEXP:TCOF1:chr5:149737202:149779871:+:6949	TCOF1	GEXP	5	149737202	149779871	10068994	11.1	19.1	0.667	144
N:GEXP:NOP2:chr12:6666037:6677480:-:4839	NOP2	GEXP	12	6666037	6677480	N:GEXP:TCOF1:chr5:149737202:149779871:+:6949	TCOF1	GEXP	5	149737202	149779871	500000000	9.2	17.2	0.64	144
N:GEXP:NOP16:chr5:175810949:175815540:-:51491	NOP16	GEXP	5	175810949	175815540	N:GEXP:TCOF1:chr5:149737202:149779871:+:6949	TCOF1	GEXP	5	149737202	149779871	26031078	9.1	17.2	0.639	144
N:GEXP:PKMYT1:chr16:3022792:3030540:-:9088	PKMYT1	GEXP	16	3022792	3030540	N:GEXP:TCOF1:chr5:149737202:149779871:+:6949	TCOF1	GEXP	5	149737202	149779871	500000000	7.6	15.6	0.615	144
N:GEXP:SNRPA:chr19:41256759:41271297:+:6626	SNRPA	GEXP	19	41256759	41271297	N:GEXP:TCOF1:chr5:149737202:149779871:+:6949	TCOF1	GEXP	5	149737202	149779871	500000000	7.2	15.3	0.609	144
N:GEXP:CCNB1:chr5:68462837:68474070:+:891	CCNB1	GEXP	5	68462837	68474070	N:GEXP:TCOF1:chr5:149737202:149779871:+:6949	TCOF1	GEXP	5	149737202	149779871	81263132	7	15.1	0.607	144
N:GEXP:C17ORF53:chr17:42219274:42239844:+:78995	C17ORF53	GEXP	17	42219274	42239844	N:GEXP:TCOF1:chr5:149737202:149779871:+:6949	TCOF1	GEXP	5	149737202	149779871	500000000	6.7	14.8	0.601	144
N:GEXP:TCOF1:chr5:149737202:149779871:+:6949	TCOF1	GEXP	5	149737202	149779871	N:GEXP:THOP1:chr19:2785506:2813599:+:7064	THOP1	GEXP	19	2785506	2813599	500000000	6.5	14.5	0.597	144
N:GEXP:PRELID1:chr5:176730835:176733950:+:27166	PRELID1	GEXP	5	176730835	176733950	N:GEXP:TCOF1:chr5:149737202:149779871:+:6949	TCOF1	GEXP	5	149737202	149779871	26950964	6.4	14.5	0.596	144
N:GEXP:BIRC5:chr17:76210277:76221716:+:332	BIRC5	GEXP	17	76210277	76221716	N:GEXP:TCOF1:chr5:149737202:149779871:+:6949	TCOF1	GEXP	5	149737202	149779871	500000000	6.3	14.4	0.594	144
N:GEXP:SFXN1:chr5:174905514:174955621:+:94081	SFXN1	GEXP	5	174905514	174955621	N:GEXP:TCOF1:chr5:149737202:149779871:+:6949	TCOF1	GEXP	5	149737202	149779871	25125643	6.3	14.4	0.595	144
N:GEXP:CDC45:chr22:19467414:19508135:+:8318	CDC45	GEXP	22	19467414	19508135	N:GEXP:TCOF1:chr5:149737202:149779871:+:6949	TCOF1	GEXP	5	149737202	149779871	500000000	6.2	14.2	0.592	144
N:GEXP:DAZAP1:chr19:1407584:1435682:+:26528	DAZAP1	GEXP	19	1407584	1435682	N:GEXP:TCOF1:chr5:149737202:149779871:+:6949	TCOF1	GEXP	5	149737202	149779871	500000000	5.7	13.8	0.584	144
N:GEXP:RPL26L1:chr5:172386439:172396774:+:51121	RPL26L1	GEXP	5	172386439	172396774	N:GEXP:TCOF1:chr5:149737202:149779871:+:6949	TCOF1	GEXP	5	149737202	149779871	22606568	5.7	13.7	0.583	144
N:GEXP:CENPH:chr5:68485375:68506184:+:64946	CENPH	GEXP	5	68485375	68506184	N:GEXP:TCOF1:chr5:149737202:149779871:+:6949	TCOF1	GEXP	5	149737202	149779871	81231018	5.3	13.4	0.577	144
N:GEXP:TBRG4:chr7:45139699:45151317:-:9238	TBRG4	GEXP	7	45139699	45151317	N:GEXP:TCOF1:chr5:149737202:149779871:+:6949	TCOF1	GEXP	5	149737202	149779871	500000000	5.1	13.1	0.572	144
N:GEXP:AURKB:chr17:8108049:8113883:-:9212	AURKB	GEXP	17	8108049	8113883	N:GEXP:TCOF1:chr5:149737202:149779871:+:6949	TCOF1	GEXP	5	149737202	149779871	500000000	4.8	12.9	0.566	144
N:GEXP:MRPL22:chr5:154320633:154348971:+:29093	MRPL22	GEXP	5	154320633	154348971	N:GEXP:TCOF1:chr5:149737202:149779871:+:6949	TCOF1	GEXP	5	149737202	149779871	4540762	4.8	12.9	0.567	144
N:GEXP:PTBP1:chr19:797392:812327:+:5725	PTBP1	GEXP	19	797392	812327	N:GEXP:TCOF1:chr5:149737202:149779871:+:6949	TCOF1	GEXP	5	149737202	149779871	500000000	4.9	12.9	0.568	144
N:GEXP:KIF20A:chr5:137514417:137523404:+:10112	KIF20A	GEXP	5	137514417	137523404	N:GEXP:TCOF1:chr5:149737202:149779871:+:6949	TCOF1	GEXP	5	149737202	149779871	12213798	4.7	12.8	0.565	144
N:GEXP:C15ORF23:chr15:40674922:40686489:+:90417	C15ORF23	GEXP	15	40674922	40686489	N:GEXP:TCOF1:chr5:149737202:149779871:+:6949	TCOF1	GEXP	5	149737202	149779871	500000000	4.7	12.8	0.566	144
N:GEXP:SNRPD1:chr18:19192260:19210208:+:6632	SNRPD1	GEXP	18	19192260	19210208	N:GEXP:TCOF1:chr5:149737202:149779871:+:6949	TCOF1	GEXP	5	149737202	149779871	500000000	4.7	12.8	0.566	144
N:GEXP:CCDC99:chr5:169010638:169031781:+:54908	CCDC99	GEXP	5	169010638	169031781	N:GEXP:TCOF1:chr5:149737202:149779871:+:6949	TCOF1	GEXP	5	149737202	149779871	19230767	4.8	12.8	0.566	144
N:GEXP:ANKRD32:chr5:93954391:94031573:+:84250	ANKRD32	GEXP	5	93954391	94031573	N:GEXP:TCOF1:chr5:149737202:149779871:+:6949	TCOF1	GEXP	5	149737202	149779871	55705629	4.6	12.7	0.563	144
N:GEXP:HARS:chr5:140053490:140070971:-:3035	HARS	GEXP	5	140053490	140070971	N:GEXP:TCOF1:chr5:149737202:149779871:+:6949	TCOF1	GEXP	5	149737202	149779871	9666231	4.6	12.7	0.563	144
N:GEXP:NOC4L:chr12:132628993:132636986:+:79050	NOC4L	GEXP	12	132628993	132636986	N:GEXP:TCOF1:chr5:149737202:149779871:+:6949	TCOF1	GEXP	5	149737202	149779871	500000000	4.5	12.5	0.56	144
N:GEXP:CDT1:chr16:88870186:88875666:+:81620	CDT1	GEXP	16	88870186	88875666	N:GEXP:TCOF1:chr5:149737202:149779871:+:6949	TCOF1	GEXP	5	149737202	149779871	500000000	4.4	12.5	0.559	144
N:GEXP:PRR7:chr5:176873796:176883287:+:80758	PRR7	GEXP	5	176873796	176883287	N:GEXP:TCOF1:chr5:149737202:149779871:+:6949	TCOF1	GEXP	5	149737202	149779871	27093925	4.4	12.5	0.559	144
N:GEXP:NUDT1:chr7:2281857:2290780:+:4521	NUDT1	GEXP	7	2281857	2290780	N:GEXP:TCOF1:chr5:149737202:149779871:+:6949	TCOF1	GEXP	5	149737202	149779871	500000000	4.3	12.4	0.557	144
N:GEXP:TCOF1:chr5:149737202:149779871:+:6949	TCOF1	GEXP	5	149737202	149779871	N:GEXP:ZNF598:chr16:2047768:2059763:-:90850	ZNF598	GEXP	16	2047768	2059763	500000000	4.2	12.3	0.556	144
N:GEXP:DEPDC1B:chr5:59892739:59995993:-:55789	DEPDC1B	GEXP	5	59892739	59995993	N:GEXP:TCOF1:chr5:149737202:149779871:+:6949	TCOF1	GEXP	5	149737202	149779871	89741209	4.3	12.3	0.556	144
N:GEXP:CDC25C:chr5:137620959:137674044:-:995	CDC25C	GEXP	5	137620959	137674044	N:GEXP:TCOF1:chr5:149737202:149779871:+:6949	TCOF1	GEXP	5	149737202	149779871	12063158	4.2	12.3	0.556	144
N:GEXP:MRPL12:chr17:79670399:79674556:+:6182	MRPL12	GEXP	17	79670399	79674556	N:GEXP:TCOF1:chr5:149737202:149779871:+:6949	TCOF1	GEXP	5	149737202	149779871	500000000	4.1	12.2	0.553	144
N:GEXP:SRP19:chr5:112196885:112228776:+:6728	SRP19	GEXP	5	112196885	112228776	N:GEXP:TCOF1:chr5:149737202:149779871:+:6949	TCOF1	GEXP	5	149737202	149779871	37508426	4.2	12.2	0.554	144
N:GEXP:NCLN:chr19:3185875:3209573:+:56926	NCLN	GEXP	19	3185875	3209573	N:GEXP:TCOF1:chr5:149737202:149779871:+:6949	TCOF1	GEXP	5	149737202	149779871	500000000	4.2	12.2	0.554	144
N:GEXP:CENPW:chr6:126661253:126669754:+:387103	CENPW	GEXP	6	126661253	126669754	N:GEXP:TCOF1:chr5:149737202:149779871:+:6949	TCOF1	GEXP	5	149737202	149779871	500000000	4.1	12.2	0.553	144
N:GEXP:DBF4:chr7:87505544:87538856:+:10926	DBF4	GEXP	7	87505544	87538856	N:GEXP:TCOF1:chr5:149737202:149779871:+:6949	TCOF1	GEXP	5	149737202	149779871	500000000	4.1	12.1	0.552	144
N:GEXP:MRPS17:chr7:56019611:56023033:+:51373	MRPS17	GEXP	7	56019611	56023033	N:GEXP:TCOF1:chr5:149737202:149779871:+:6949	TCOF1	GEXP	5	149737202	149779871	500000000	3.9	12	0.55	144
N:GEXP:TCOF1:chr5:149737202:149779871:+:6949	TCOF1	GEXP	5	149737202	149779871	N:GEXP:TOMM40:chr19:45394477:45406946:+:10452	TOMM40	GEXP	19	45394477	45406946	500000000	3.8	11.9	0.548	144
N:GEXP:SRM:chr1:11114649:11120091:-:6723	SRM	GEXP	1	11114649	11120091	N:GEXP:TCOF1:chr5:149737202:149779871:+:6949	TCOF1	GEXP	5	149737202	149779871	500000000	3.8	11.9	0.547	144
N:GEXP:HJURP:chr2:234745486:234763212:-:55355	HJURP	GEXP	2	234745486	234763212	N:GEXP:TCOF1:chr5:149737202:149779871:+:6949	TCOF1	GEXP	5	149737202	149779871	500000000	3.8	11.9	0.548	144
N:GEXP:MRTO4:chr1:19578075:19586622:+:51154	MRTO4	GEXP	1	19578075	19586622	N:GEXP:TCOF1:chr5:149737202:149779871:+:6949	TCOF1	GEXP	5	149737202	149779871	500000000	3.8	11.9	0.547	144
N:GEXP:NSUN5:chr7:72716514:72722864:-:55695	NSUN5	GEXP	7	72716514	72722864	N:GEXP:TCOF1:chr5:149737202:149779871:+:6949	TCOF1	GEXP	5	149737202	149779871	500000000	3.8	11.9	0.547	144
N:GEXP:TCOF1:chr5:149737202:149779871:+:6949	TCOF1	GEXP	5	149737202	149779871	N:GEXP:WDR74:chr11:62600383:62609281:-:54663	WDR74	GEXP	11	62600383	62609281	500000000	3.7	11.8	0.544	144
N:GEXP:RNASEH2A:chr19:12917428:12924462:+:10535	RNASEH2A	GEXP	19	12917428	12924462	N:GEXP:TCOF1:chr5:149737202:149779871:+:6949	TCOF1	GEXP	5	149737202	149779871	500000000	3.7	11.8	0.545	144
N:GEXP:HNRNPAB:chr5:177631508:177638184:+:3182	HNRNPAB	GEXP	5	177631508	177638184	N:GEXP:TCOF1:chr5:149737202:149779871:+:6949	TCOF1	GEXP	5	149737202	149779871	27851637	3.7	11.8	0.545	144
N:GEXP:DDX39A:chr19:14519610:14530195:-:10212	DDX39A	GEXP	19	14519610	14530195	N:GEXP:TCOF1:chr5:149737202:149779871:+:6949	TCOF1	GEXP	5	149737202	149779871	500000000	3.7	11.8	0.544	144
N:GEXP:TCOF1:chr5:149737202:149779871:+:6949	TCOF1	GEXP	5	149737202	149779871	N:MIRN:HSA-MIR-7-5P:chr15:89155056:89155165:+:mature	HSA-MIR-7-5P	MIRN	15	89155056	89155165	500000000	4.2	11.7	0.544	144
N:GEXP:TCOF1:chr5:149737202:149779871:+:6949	TCOF1	GEXP	5	149737202	149779871	N:GEXP:UTP15:chr5:72861598:72877794:+:84135	UTP15	GEXP	5	72861598	72877794	76859408	3.7	11.7	0.544	144
N:GEXP:LYAR:chr4:4269429:4291896:-:55646	LYAR	GEXP	4	4269429	4291896	N:GEXP:TCOF1:chr5:149737202:149779871:+:6949	TCOF1	GEXP	5	149737202	149779871	500000000	3.6	11.7	0.544	144
N:GEXP:ORC1:chr1:52838501:52870143:-:4998	ORC1	GEXP	1	52838501	52870143	N:GEXP:TCOF1:chr5:149737202:149779871:+:6949	TCOF1	GEXP	5	149737202	149779871	500000000	3.6	11.7	0.543	144
N:GEXP:RUVBL1:chr3:127783628:127872757:-:8607	RUVBL1	GEXP	3	127783628	127872757	N:GEXP:TCOF1:chr5:149737202:149779871:+:6949	TCOF1	GEXP	5	149737202	149779871	500000000	3.7	11.7	0.544	144
N:GEXP:EXOSC4:chr8:145133522:145135551:+:54512	EXOSC4	GEXP	8	145133522	145135551	N:GEXP:TCOF1:chr5:149737202:149779871:+:6949	TCOF1	GEXP	5	149737202	149779871	500000000	3.6	11.7	0.543	144
N:GEXP:C10ORF2:chr10:102747293:102754158:+:56652	C10ORF2	GEXP	10	102747293	102754158	N:GEXP:TCOF1:chr5:149737202:149779871:+:6949	TCOF1	GEXP	5	149737202	149779871	500000000	3.6	11.7	0.543	144
N:GEXP:RBM19:chr12:114254543:114404176:-:9904	RBM19	GEXP	12	114254543	114404176	N:GEXP:TCOF1:chr5:149737202:149779871:+:6949	TCOF1	GEXP	5	149737202	149779871	500000000	3.5	11.6	0.541	144
N:GEXP:LRR1:chr14:50065415:50081390:+:122769	LRR1	GEXP	14	50065415	50081390	N:GEXP:TCOF1:chr5:149737202:149779871:+:6949	TCOF1	GEXP	5	149737202	149779871	500000000	3.5	11.6	0.541	144
N:GEXP:FANCB:chrX:14861529:14891184:-:2187	FANCB	GEXP	X	14861529	14891184	N:GEXP:TCOF1:chr5:149737202:149779871:+:6949	TCOF1	GEXP	5	149737202	149779871	500000000	3.5	11.6	0.542	144
N:GEXP:POLD1:chr19:50887593:50921271:+:5424	POLD1	GEXP	19	50887593	50921271	N:GEXP:TCOF1:chr5:149737202:149779871:+:6949	TCOF1	GEXP	5	149737202	149779871	500000000	3.4	11.5	0.538	144
N:GEXP:TCERG1:chr5:145826873:145891069:+:10915	TCERG1	GEXP	5	145826873	145891069	N:GEXP:TCOF1:chr5:149737202:149779871:+:6949	TCOF1	GEXP	5	149737202	149779871	3846133	3.4	11.5	0.538	144
N:GEXP:KPNA2:chr17:66031848:66042970:+:3838	KPNA2	GEXP	17	66031848	66042970	N:GEXP:TCOF1:chr5:149737202:149779871:+:6949	TCOF1	GEXP	5	149737202	149779871	500000000	3.4	11.5	0.539	144
N:GEXP:KIAA1524:chr3:108268718:108308491:-:57650	KIAA1524	GEXP	3	108268718	108308491	N:GEXP:TCOF1:chr5:149737202:149779871:+:6949	TCOF1	GEXP	5	149737202	149779871	500000000	3.4	11.5	0.54	144
N:GEXP:KIF18A:chr11:28042163:28129746:-:81930	KIF18A	GEXP	11	28042163	28129746	N:GEXP:TCOF1:chr5:149737202:149779871:+:6949	TCOF1	GEXP	5	149737202	149779871	500000000	3.3	11.4	0.537	144
N:GEXP:PDSS1:chr10:26986595:27035726:+:23590	PDSS1	GEXP	10	26986595	27035726	N:GEXP:TCOF1:chr5:149737202:149779871:+:6949	TCOF1	GEXP	5	149737202	149779871	500000000	3.4	11.4	0.538	144
N:GEXP:RAD54L:chr1:46713367:46744145:+:8438	RAD54L	GEXP	1	46713367	46744145	N:GEXP:TCOF1:chr5:149737202:149779871:+:6949	TCOF1	GEXP	5	149737202	149779871	500000000	3.3	11.4	0.537	144
N:GEXP:TCOF1:chr5:149737202:149779871:+:6949	TCOF1	GEXP	5	149737202	149779871	N:GEXP:TRMT1:chr19:13215714:13227563:-:55621	TRMT1	GEXP	19	13215714	13227563	500000000	3.2	11.2	0.534	144
N:GEXP:CDCA4:chr14:105475910:105487425:-:55038	CDCA4	GEXP	14	105475910	105487425	N:GEXP:TCOF1:chr5:149737202:149779871:+:6949	TCOF1	GEXP	5	149737202	149779871	500000000	3.1	11.2	0.532	144
N:GEXP:RECQL4:chr8:145736667:145743210:-:9401	RECQL4	GEXP	8	145736667	145743210	N:GEXP:TCOF1:chr5:149737202:149779871:+:6949	TCOF1	GEXP	5	149737202	149779871	500000000	3.1	11.2	0.532	144
N:GEXP:TCOF1:chr5:149737202:149779871:+:6949	TCOF1	GEXP	5	149737202	149779871	N:GEXP:YARS2:chr12:32899478:32908887:-:51067	YARS2	GEXP	12	32899478	32908887	500000000	3	11.1	0.531	144
N:GEXP:TCOF1:chr5:149737202:149779871:+:6949	TCOF1	GEXP	5	149737202	149779871	N:GEXP:TERT:chr5:1253287:1295162:-:7015	TERT	GEXP	5	1253287	1295162	148442040	3	11.1	0.53	144
N:GEXP:KIF18B:chr17:43002082:43025082:-:146909	KIF18B	GEXP	17	43002082	43025082	N:GEXP:TCOF1:chr5:149737202:149779871:+:6949	TCOF1	GEXP	5	149737202	149779871	500000000	3	11.1	0.531	144
N:GEXP:C3ORF26:chr3:99536678:99897476:+:84319	C3ORF26	GEXP	3	99536678	99897476	N:GEXP:TCOF1:chr5:149737202:149779871:+:6949	TCOF1	GEXP	5	149737202	149779871	500000000	3.1	11.1	0.531	144
N:GEXP:RFC4:chr3:186507682:186524484:-:5984	RFC4	GEXP	3	186507682	186524484	N:GEXP:TCOF1:chr5:149737202:149779871:+:6949	TCOF1	GEXP	5	149737202	149779871	500000000	3	11.1	0.53	144
N:GEXP:NOP58:chr2:203130515:203168384:+:51602	NOP58	GEXP	2	203130515	203168384	N:GEXP:TCOF1:chr5:149737202:149779871:+:6949	TCOF1	GEXP	5	149737202	149779871	500000000	3.1	11.1	0.531	144
N:GEXP:POP1:chr8:99129521:99172069:+:10940	POP1	GEXP	8	99129521	99172069	N:GEXP:TCOF1:chr5:149737202:149779871:+:6949	TCOF1	GEXP	5	149737202	149779871	500000000	3	11.1	0.531	144
N:GEXP:TCOF1:chr5:149737202:149779871:+:6949	TCOF1	GEXP	5	149737202	149779871	N:GEXP:UBE2C:chr20:44441255:44445596:+:11065	UBE2C	GEXP	20	44441255	44445596	500000000	2.9	11	0.529	144
N:GEXP:SLIRP:chr14:78174425:78183941:+:81892	SLIRP	GEXP	14	78174425	78183941	N:GEXP:TCOF1:chr5:149737202:149779871:+:6949	TCOF1	GEXP	5	149737202	149779871	500000000	2.9	11	0.528	144
N:GEXP:CDCA5:chr11:64844927:64851615:-:113130	CDCA5	GEXP	11	64844927	64851615	N:GEXP:TCOF1:chr5:149737202:149779871:+:6949	TCOF1	GEXP	5	149737202	149779871	500000000	2.9	11	0.527	144
N:GEXP:TCOF1:chr5:149737202:149779871:+:6949	TCOF1	GEXP	5	149737202	149779871	N:GEXP:TPX2:chr20:30326904:30389603:+:22974	TPX2	GEXP	20	30326904	30389603	500000000	2.8	10.9	0.526	144
N:GEXP:GPRIN1:chr5:176022803:176037131:-:114787	GPRIN1	GEXP	5	176022803	176037131	N:GEXP:TCOF1:chr5:149737202:149779871:+:6949	TCOF1	GEXP	5	149737202	149779871	26242932	2.8	10.9	0.527	144
N:GEXP:GRK6:chr5:176853687:176869850:+:2870	GRK6	GEXP	5	176853687	176869850	N:GEXP:TCOF1:chr5:149737202:149779871:+:6949	TCOF1	GEXP	5	149737202	149779871	27073816	2.8	10.9	0.526	144
N:GEXP:DKC1:chrX:153991031:154005964:+:1736	DKC1	GEXP	X	153991031	154005964	N:GEXP:TCOF1:chr5:149737202:149779871:+:6949	TCOF1	GEXP	5	149737202	149779871	500000000	2.8	10.9	0.526	144
N:GEXP:TCOF1:chr5:149737202:149779871:+:6949	TCOF1	GEXP	5	149737202	149779871	N:GEXP:TROAP:chr12:49716971:49725514:+:10024	TROAP	GEXP	12	49716971	49725514	500000000	2.7	10.8	0.523	144
N:GEXP:DDX56:chr7:44605403:44614137:-:54606	DDX56	GEXP	7	44605403	44614137	N:GEXP:TCOF1:chr5:149737202:149779871:+:6949	TCOF1	GEXP	5	149737202	149779871	500000000	2.7	10.8	0.524	144
N:GEXP:LARP1:chr5:154092462:154197163:+:23367	LARP1	GEXP	5	154092462	154197163	N:GEXP:TCOF1:chr5:149737202:149779871:+:6949	TCOF1	GEXP	5	149737202	149779871	4312591	2.7	10.8	0.523	144
N:GEXP:C16ORF59:chr16:2510115:2514964:+:80178	C16ORF59	GEXP	16	2510115	2514964	N:GEXP:TCOF1:chr5:149737202:149779871:+:6949	TCOF1	GEXP	5	149737202	149779871	500000000	2.8	10.8	0.525	144
N:GEXP:BUB1B:chr15:40453210:40513337:+:701	BUB1B	GEXP	15	40453210	40513337	N:GEXP:TCOF1:chr5:149737202:149779871:+:6949	TCOF1	GEXP	5	149737202	149779871	500000000	2.7	10.8	0.524	144
N:GEXP:LMNB1:chr5:126112315:126172712:+:4001	LMNB1	GEXP	5	126112315	126172712	N:GEXP:TCOF1:chr5:149737202:149779871:+:6949	TCOF1	GEXP	5	149737202	149779871	23564490	2.6	10.7	0.521	144
N:GEXP:DNAJC7:chr17:40128439:40169715:-:7266	DNAJC7	GEXP	17	40128439	40169715	N:GEXP:TCOF1:chr5:149737202:149779871:+:6949	TCOF1	GEXP	5	149737202	149779871	500000000	2.6	10.7	0.521	144
N:GEXP:BRI3BP:chr12:125478194:125510349:+:140707	BRI3BP	GEXP	12	125478194	125510349	N:GEXP:TCOF1:chr5:149737202:149779871:+:6949	TCOF1	GEXP	5	149737202	149779871	500000000	2.6	10.7	0.522	144
N:GEXP:CCDC137:chr17:79633761:79640936:+:339230	CCDC137	GEXP	17	79633761	79640936	N:GEXP:TCOF1:chr5:149737202:149779871:+:6949	TCOF1	GEXP	5	149737202	149779871	500000000	2.6	10.7	0.521	144
N:GEXP:CENPN:chr16:81040103:81066709:+:55839	CENPN	GEXP	16	81040103	81066709	N:GEXP:TCOF1:chr5:149737202:149779871:+:6949	TCOF1	GEXP	5	149737202	149779871	500000000	2.5	10.6	0.52	144
N:GEXP:TCOF1:chr5:149737202:149779871:+:6949	TCOF1	GEXP	5	149737202	149779871	N:GEXP:TK1:chr17:76170160:76183285:-:7083	TK1	GEXP	17	76170160	76183285	500000000	2.4	10.5	0.517	144
N:GEXP:TCOF1:chr5:149737202:149779871:+:6949	TCOF1	GEXP	5	149737202	149779871	N:GEXP:TFAP4:chr16:4307187:4323001:-:7023	TFAP4	GEXP	16	4307187	4323001	500000000	2.4	10.5	0.518	144
N:GEXP:TACO1:chr17:61678231:61685725:+:51204	TACO1	GEXP	17	61678231	61685725	N:GEXP:TCOF1:chr5:149737202:149779871:+:6949	TCOF1	GEXP	5	149737202	149779871	500000000	2.4	10.4	0.516	144
N:GEXP:NCAPH:chr2:97001484:97041274:+:23397	NCAPH	GEXP	2	97001484	97041274	N:GEXP:TCOF1:chr5:149737202:149779871:+:6949	TCOF1	GEXP	5	149737202	149779871	500000000	2.3	10.4	0.515	144
N:GEXP:EXO1:chr1:242011493:242053241:+:9156	EXO1	GEXP	1	242011493	242053241	N:GEXP:TCOF1:chr5:149737202:149779871:+:6949	TCOF1	GEXP	5	149737202	149779871	500000000	2.3	10.4	0.515	144
N:GEXP:CDC20:chr1:43824626:43828873:+:991	CDC20	GEXP	1	43824626	43828873	N:GEXP:TCOF1:chr5:149737202:149779871:+:6949	TCOF1	GEXP	5	149737202	149779871	500000000	2.4	10.4	0.516	144
N:GEXP:TCOF1:chr5:149737202:149779871:+:6949	TCOF1	GEXP	5	149737202	149779871	N:MIRN:HSA-MIR-7-3:chr19:4770682:4770791:+:	HSA-MIR-7-3	MIRN	19	4770682	4770791	500000000	2.5	10.1	0.508	144
N:GEXP:TCOF1:chr5:149737202:149779871:+:6949	TCOF1	GEXP	5	149737202	149779871	N:METH:MIR548H4:chr15:69374595:::cg18263455	MIR548H4 cg18263455	METH	15	69374595		500000000	1.1	9.6	0.499	142
N:GEXP:TCOF1:chr5:149737202:149779871:+:6949	TCOF1	GEXP	5	149737202	149779871	N:MIRN:HSA-MIR-7-1:chr9:86584663:86584772:+:	HSA-MIR-7-1	MIRN	9	86584663	86584772	500000000	1.1	8.7	0.474	144
N:GEXP:TCOF1:chr5:149737202:149779871:+:6949	TCOF1	GEXP	5	149737202	149779871	N:MIRN:HSA-MIR-21:chr17:57918627:57918698:+:MIMAT0004494	HSA-MIR-21	MIRN	17	57918627	57918698	500000000	1	8.6	0.472	144
N:GEXP:TCOF1:chr5:149737202:149779871:+:6949	TCOF1	GEXP	5	149737202	149779871	N:MIRN:HSA-MIR-1293:chr12:50627925:50627995:+:	HSA-MIR-1293	MIRN	12	50627925	50627995	500000000	1	8.6	0.47	144
N:GEXP:TCOF1:chr5:149737202:149779871:+:6949	TCOF1	GEXP	5	149737202	149779871	N:MIRN:HSA-MIR-18A:chr13:92003005:92003075:+:MIMAT0002891	HSA-MIR-18A	MIRN	13	92003005	92003075	500000000	0.8	8.3	0.464	144
N:GEXP:TCOF1:chr5:149737202:149779871:+:6949	TCOF1	GEXP	5	149737202	149779871	N:MIRN:HSA-MIR-21-3P:chr17:57918627:57918698:+:mature	HSA-MIR-21-3P	MIRN	17	57918627	57918698	500000000	0.6	8.2	0.461	144
N:GEXP:TCOF1:chr5:149737202:149779871:+:6949	TCOF1	GEXP	5	149737202	149779871	N:MIRN:HSA-MIR-7-2:chr15:89155056:89155165:+:	HSA-MIR-7-2	MIRN	15	89155056	89155165	500000000	0.5	8.1	0.458	144
N:GEXP:TCOF1:chr5:149737202:149779871:+:6949	TCOF1	GEXP	5	149737202	149779871	N:MIRN:HSA-MIR-629-3P:chr15:70371711:70371807:+:mature	HSA-MIR-629-3P	MIRN	15	70371711	70371807	500000000	0.4	8	0.455	144
N:GEXP:TCOF1:chr5:149737202:149779871:+:6949	TCOF1	GEXP	5	149737202	149779871	N:MIRN:HSA-MIR-942:chr1:117637265:117637350:+:	HSA-MIR-942	MIRN	1	117637265	117637350	500000000	0.3	7.9	0.452	144
N:GEXP:TCOF1:chr5:149737202:149779871:+:6949	TCOF1	GEXP	5	149737202	149779871	N:MIRN:HSA-MIR-3615:chr17:72744752:72744838:+:	HSA-MIR-3615	MIRN	17	72744752	72744838	500000000	0.2	7.8	0.45	144
N:GEXP:TCOF1:chr5:149737202:149779871:+:6949	TCOF1	GEXP	5	149737202	149779871	N:MIRN:HSA-MIR-942:chr1:117637265:117637350:+:MIMAT0004985	HSA-MIR-942	MIRN	1	117637265	117637350	500000000	0	7.6	0.444	144
N:GEXP:TCOF1:chr5:149737202:149779871:+:6949	TCOF1	GEXP	5	149737202	149779871	N:MIRN:HSA-MIR-629:chr15:70371711:70371807:+:MIMAT0003298	HSA-MIR-629	MIRN	15	70371711	70371807	500000000	0	7.3	0.435	144
N:GEXP:TCOF1:chr5:149737202:149779871:+:6949	TCOF1	GEXP	5	149737202	149779871	N:MIRN:HSA-MIR-7-1-3P:chr9:86584663:86584772:+:mature	HSA-MIR-7-1-3P	MIRN	9	86584663	86584772	500000000	0	7.2	0.432	144
N:GEXP:TCOF1:chr5:149737202:149779871:+:6949	TCOF1	GEXP	5	149737202	149779871	N:MIRN:HSA-MIR-3615:chr17:72744752:72744838:+:MIMAT0017994	HSA-MIR-3615	MIRN	17	72744752	72744838	500000000	0	7.2	0.431	144
N:GEXP:TCOF1:chr5:149737202:149779871:+:6949	TCOF1	GEXP	5	149737202	149779871	N:MIRN:HSA-MIR-18A:chr13:92003005:92003075:+:MIMAT0000072	HSA-MIR-18A	MIRN	13	92003005	92003075	500000000	0	7.2	0.431	144
N:GEXP:TCOF1:chr5:149737202:149779871:+:6949	TCOF1	GEXP	5	149737202	149779871	N:MIRN:HSA-MIR-18A:chr13:92003005:92003075:+:	HSA-MIR-18A	MIRN	13	92003005	92003075	500000000	0	7.2	0.432	144
N:GEXP:TCOF1:chr5:149737202:149779871:+:6949	TCOF1	GEXP	5	149737202	149779871	N:MIRN:HSA-MIR-942:chr1:117637265:117637350:+:mature	HSA-MIR-942	MIRN	1	117637265	117637350	500000000	0	7.1	0.428	144
N:GEXP:TCOF1:chr5:149737202:149779871:+:6949	TCOF1	GEXP	5	149737202	149779871	N:MIRN:HSA-MIR-3677-3P:chr16:2320714:2320773:+:mature	HSA-MIR-3677-3P	MIRN	16	2320714	2320773	500000000	0	6.9	0.424	144
N:GEXP:TCOF1:chr5:149737202:149779871:+:6949	TCOF1	GEXP	5	149737202	149779871	N:MIRN:HSA-MIR-3615:chr17:72744752:72744838:+:mature	HSA-MIR-3615	MIRN	17	72744752	72744838	500000000	0	6.9	0.422	144
N:GEXP:TCOF1:chr5:149737202:149779871:+:6949	TCOF1	GEXP	5	149737202	149779871	N:MIRN:HSA-MIR-629:chr15:70371711:70371807:+:MIMAT0004810	HSA-MIR-629	MIRN	15	70371711	70371807	500000000	0	6.5	0.412	144
N:GEXP:TCOF1:chr5:149737202:149779871:+:6949	TCOF1	GEXP	5	149737202	149779871	N:MIRN:HSA-MIR-629:chr15:70371711:70371807:+:	HSA-MIR-629	MIRN	15	70371711	70371807	500000000	0	6.5	0.412	144
N:GEXP:TCOF1:chr5:149737202:149779871:+:6949	TCOF1	GEXP	5	149737202	149779871	N:MIRN:HSA-MIR-629-5P:chr15:70371711:70371807:+:mature	HSA-MIR-629-5P	MIRN	15	70371711	70371807	500000000	0	6.5	0.41	144
N:GEXP:TCOF1:chr5:149737202:149779871:+:6949	TCOF1	GEXP	5	149737202	149779871	N:MIRN:HSA-MIR-21-5P:chr17:57918627:57918698:+:mature	HSA-MIR-21-5P	MIRN	17	57918627	57918698	500000000	0	6.5	0.411	144
N:GEXP:TCOF1:chr5:149737202:149779871:+:6949	TCOF1	GEXP	5	149737202	149779871	N:MIRN:HSA-MIR-18A-5P:chr13:92003005:92003075:+:mature	HSA-MIR-18A-5P	MIRN	13	92003005	92003075	500000000	0	6.5	0.41	144
N:GEXP:TCOF1:chr5:149737202:149779871:+:6949	TCOF1	GEXP	5	149737202	149779871	N:MIRN:HSA-MIR-7-1:chr9:86584663:86584772:+:MIMAT0004553	HSA-MIR-7-1	MIRN	9	86584663	86584772	500000000	0	6.4	0.409	144
N:GEXP:TCOF1:chr5:149737202:149779871:+:6949	TCOF1	GEXP	5	149737202	149779871	N:MIRN:HSA-MIR-3648:chr21:9825832:9826011:+:	HSA-MIR-3648	MIRN	21	9825832	9826011	500000000	0	6.4	0.407	144
N:GEXP:TCOF1:chr5:149737202:149779871:+:6949	TCOF1	GEXP	5	149737202	149779871	N:MIRN:HSA-MIR-19A:chr13:92003145:92003226:+:	HSA-MIR-19A	MIRN	13	92003145	92003226	500000000	0	6.4	0.406	144
N:GEXP:TCOF1:chr5:149737202:149779871:+:6949	TCOF1	GEXP	5	149737202	149779871	N:MIRN:HSA-MIR-3934:chr6:33665905:33666011:+:	HSA-MIR-3934	MIRN	6	33665905	33666011	500000000	0	6.3	0.403	144
N:GEXP:TCOF1:chr5:149737202:149779871:+:6949	TCOF1	GEXP	5	149737202	149779871	N:MIRN:HSA-MIR-3677:chr16:2320714:2320773:+:MIMAT0018101	HSA-MIR-3677	MIRN	16	2320714	2320773	500000000	0	6.3	0.404	144
N:GEXP:TCOF1:chr5:149737202:149779871:+:6949	TCOF1	GEXP	5	149737202	149779871	N:MIRN:HSA-MIR-3677:chr16:2320714:2320773:+:	HSA-MIR-3677	MIRN	16	2320714	2320773	500000000	0	6.2	0.403	144
N:GEXP:TCOF1:chr5:149737202:149779871:+:6949	TCOF1	GEXP	5	149737202	149779871	N:MIRN:HSA-MIR-18A-3P:chr13:92003005:92003075:+:mature	HSA-MIR-18A-3P	MIRN	13	92003005	92003075	500000000	0	6.2	0.402	144
N:GEXP:TCOF1:chr5:149737202:149779871:+:6949	TCOF1	GEXP	5	149737202	149779871	N:RPPA:CCNB1:chr5:68462837:68474070:+:Cyclin_B1-R-V	CCNB1	RPPA	5	68462837	68474070	81263132	0	6	0.641	48
N:CNVR:SH3TC2:chr5:148340000:148341999::	chr5:148,340,000-148,341,999 (2Mb, SH3TC2)	CNVR	5	148340000	148341999	N:GEXP:TCOF1:chr5:149737202:149779871:+:6949	TCOF1	GEXP	5	149737202	149779871	1395203	0	6	0.418	128
N:CNVR:5q32:chr5:148342000:150204999::	chr5:148,342,000-150,204,999 (2bp, 5q32)	CNVR	5	148342000	150204999	N:GEXP:TCOF1:chr5:149737202:149779871:+:6949	TCOF1	GEXP	5	149737202	149779871	0	0	5.9	0.413	128
N:CNVR:5q32:chr5:144654000:148339999::	chr5:144,654,000-148,339,999 (4bp, 5q32)	CNVR	5	144654000	148339999	N:GEXP:TCOF1:chr5:149737202:149779871:+:6949	TCOF1	GEXP	5	149737202	149779871	1397203	0	5.9	0.412	128
N:CNVR:5q22.3:chr5:113446000:113897999::	chr5:113,446,000-113,897,999 (452Mb, 5q22.3)	CNVR	5	113446000	113897999	N:GEXP:TCOF1:chr5:149737202:149779871:+:6949	TCOF1	GEXP	5	149737202	149779871	35839203	0	5.8	0.408	128
N:CNVR:AK001582:chr5:151514000:151514999::	chr5:151,514,000-151,514,999 (100kb, AK001582)	CNVR	5	151514000	151514999	N:GEXP:TCOF1:chr5:149737202:149779871:+:6949	TCOF1	GEXP	5	149737202	149779871	1734129	0	5.6	0.402	128
N:CNVR:5q33.1:chr5:150219000:151513999::	chr5:150,219,000-151,513,999 (1bp, 5q33.1)	CNVR	5	150219000	151513999	N:GEXP:TCOF1:chr5:149737202:149779871:+:6949	TCOF1	GEXP	5	149737202	149779871	439129	0	5.5	0.4	128
N:GEXP:TCOF1:chr5:149737202:149779871:+:6949	TCOF1	GEXP	5	149737202	149779871	B:SAMP:I(C3|BLCA-TP_RPPA_CNMF_4):::::	BLCA-TP_RPPA_CNMF_4 C3	SAMP				500000000	0	4.4	0.598	48
N:GEXP:TCOF1:chr5:149737202:149779871:+:6949	TCOF1	GEXP	5	149737202	149779871	N:RPPA:EEF2:chr19:3976054:3985461:-:eEF2-R-V	EEF2	RPPA	19	3976054	3985461	500000000	0	3.7	0.51	48
N:GEXP:TCOF1:chr5:149737202:149779871:+:6949	TCOF1	GEXP	5	149737202	149779871	B:SAMP:I(C2|BLCA-TP_RPPA_CC_3):::::	BLCA-TP_RPPA_CC_3 C2	SAMP				500000000	0	3.2	0.5	48
N:GEXP:TCOF1:chr5:149737202:149779871:+:6949	TCOF1	GEXP	5	149737202	149779871	B:SAMP:I(C2,C3|BLCA-TP_RPPA_CC_3):::::	BLCA-TP_RPPA_CC_3 C2 vs C3	SAMP				500000000	0	3	0.566	35
N:GEXP:TCOF1:chr5:149737202:149779871:+:6949	TCOF1	GEXP	5	149737202	149779871	N:RPPA:MSH2:chr2:47630206:47906510:+:MSH2-M-C	MSH2	RPPA	2	47630206	47906510	500000000	0	2.8	0.446	48
N:GEXP:TCOF1:chr5:149737202:149779871:+:6949	TCOF1	GEXP	5	149737202	149779871	N:RPPA:CASP7:chr10:115438935:115490664:+:Caspase-7_cleavedD198-R-C	CASP7	RPPA	10	115438935	115490664	500000000	0	2.8	0.444	48
N:GEXP:TCOF1:chr5:149737202:149779871:+:6949	TCOF1	GEXP	5	149737202	149779871	N:RPPA:GSK3A:chr19:42734338:42746736:-:GSK3-alpha-beta-M-V	GSK3A	RPPA	19	42734338	42746736	500000000	0	2.4	0.405	48
N:GEXP:TCOF1:chr5:149737202:149779871:+:6949	TCOF1	GEXP	5	149737202	149779871	N:RPPA:MYC:chr8:128747765:128753680:+:c-Myc-R-C	MYC	RPPA	8	128747765	128753680	500000000	0	2.3	0.4	48

## Sheet: BRCA
id_a	pretty_label_a	datatype_a	chr_a	start_a	end_a	id_b	pretty_label_b	datatype_b	chr_b	start_b	end_b	link_distance	adj_logged_pvalue	logged_pvalue	correlation	num_nonna
N:GEXP:NOP16:chr5:175810949:175815540:-:51491	NOP16	GEXP	5	175810949	175815540	N:GEXP:TCOF1:chr5:149737202:149779871:+:6949	TCOF1	GEXP	5	149737202	149779871	26031078	83.7	91.8	0.624	844
N:GEXP:GRK6:chr5:176853687:176869850:+:2870	GRK6	GEXP	5	176853687	176869850	N:GEXP:TCOF1:chr5:149737202:149779871:+:6949	TCOF1	GEXP	5	149737202	149779871	27073816	81.3	89.4	0.617	844
N:GEXP:CDT1:chr16:88870186:88875666:+:81620	CDT1	GEXP	16	88870186	88875666	N:GEXP:TCOF1:chr5:149737202:149779871:+:6949	TCOF1	GEXP	5	149737202	149779871	500000000	75.7	83.8	0.602	844
N:GEXP:NOP2:chr12:6666037:6677480:-:4839	NOP2	GEXP	12	6666037	6677480	N:GEXP:TCOF1:chr5:149737202:149779871:+:6949	TCOF1	GEXP	5	149737202	149779871	500000000	75.6	83.6	0.601	844
N:GEXP:PUS1:chr12:132413745:132428406:+:80324	PUS1	GEXP	12	132413745	132428406	N:GEXP:TCOF1:chr5:149737202:149779871:+:6949	TCOF1	GEXP	5	149737202	149779871	500000000	74.5	82.6	0.598	844
N:GEXP:RRP1:chr21:45209418:45223983:+:8568	RRP1	GEXP	21	45209418	45223983	N:GEXP:TCOF1:chr5:149737202:149779871:+:6949	TCOF1	GEXP	5	149737202	149779871	500000000	73.4	81.5	0.595	844
N:GEXP:PTTG1:chr5:159848865:159855746:+:9232	PTTG1	GEXP	5	159848865	159855746	N:GEXP:TCOF1:chr5:149737202:149779871:+:6949	TCOF1	GEXP	5	149737202	149779871	10068994	72.9	81	0.593	844
N:GEXP:KIF20A:chr5:137514417:137523404:+:10112	KIF20A	GEXP	5	137514417	137523404	N:GEXP:TCOF1:chr5:149737202:149779871:+:6949	TCOF1	GEXP	5	149737202	149779871	12213798	70.8	78.9	0.587	844
N:GEXP:TCOF1:chr5:149737202:149779871:+:6949	TCOF1	GEXP	5	149737202	149779871	N:GEXP:TOMM40:chr19:45394477:45406946:+:10452	TOMM40	GEXP	19	45394477	45406946	500000000	70.7	78.8	0.587	844
N:GEXP:POLD1:chr19:50887593:50921271:+:5424	POLD1	GEXP	19	50887593	50921271	N:GEXP:TCOF1:chr5:149737202:149779871:+:6949	TCOF1	GEXP	5	149737202	149779871	500000000	69.8	77.9	0.584	844
N:GEXP:MCM7:chr7:99690404:99699427:-:4176	MCM7	GEXP	7	99690404	99699427	N:GEXP:TCOF1:chr5:149737202:149779871:+:6949	TCOF1	GEXP	5	149737202	149779871	500000000	69.6	77.7	0.583	844
N:GEXP:MXD3:chr5:176732501:176739292:-:83463	MXD3	GEXP	5	176732501	176739292	N:GEXP:TCOF1:chr5:149737202:149779871:+:6949	TCOF1	GEXP	5	149737202	149779871	26952630	68.3	76.4	0.579	844
N:GEXP:SUV39H1:chrX:48553945:48567406:+:6839	SUV39H1	GEXP	X	48553945	48567406	N:GEXP:TCOF1:chr5:149737202:149779871:+:6949	TCOF1	GEXP	5	149737202	149779871	500000000	67.6	75.7	0.577	844
N:GEXP:AURKB:chr17:8108049:8113883:-:9212	AURKB	GEXP	17	8108049	8113883	N:GEXP:TCOF1:chr5:149737202:149779871:+:6949	TCOF1	GEXP	5	149737202	149779871	500000000	67.3	75.4	0.576	844
N:GEXP:PFDN2:chr1:161070346:161087866:-:5202	PFDN2	GEXP	1	161070346	161087866	N:GEXP:TCOF1:chr5:149737202:149779871:+:6949	TCOF1	GEXP	5	149737202	149779871	500000000	65.3	73.4	0.57	844
N:GEXP:NUDT1:chr7:2281857:2290780:+:4521	NUDT1	GEXP	7	2281857	2290780	N:GEXP:TCOF1:chr5:149737202:149779871:+:6949	TCOF1	GEXP	5	149737202	149779871	500000000	63.4	71.5	0.564	844
N:GEXP:KIFC1:chr6:33359313:33377699:+:3833	KIFC1	GEXP	6	33359313	33377699	N:GEXP:TCOF1:chr5:149737202:149779871:+:6949	TCOF1	GEXP	5	149737202	149779871	500000000	63.4	71.5	0.564	844
N:GEXP:KIF18B:chr17:43002082:43025082:-:146909	KIF18B	GEXP	17	43002082	43025082	N:GEXP:TCOF1:chr5:149737202:149779871:+:6949	TCOF1	GEXP	5	149737202	149779871	500000000	62.5	70.6	0.561	844
N:GEXP:TCOF1:chr5:149737202:149779871:+:6949	TCOF1	GEXP	5	149737202	149779871	N:GEXP:TROAP:chr12:49716971:49725514:+:10024	TROAP	GEXP	12	49716971	49725514	500000000	62.3	70.3	0.56	844
N:GEXP:SRRT:chr7:100472701:100486285:+:51593	SRRT	GEXP	7	100472701	100486285	N:GEXP:TCOF1:chr5:149737202:149779871:+:6949	TCOF1	GEXP	5	149737202	149779871	500000000	61.4	69.5	0.557	844
N:GEXP:TACC3:chr4:1723217:1746905:+:10460	TACC3	GEXP	4	1723217	1746905	N:GEXP:TCOF1:chr5:149737202:149779871:+:6949	TCOF1	GEXP	5	149737202	149779871	500000000	61.3	69.4	0.557	844
N:GEXP:DAZAP1:chr19:1407584:1435682:+:26528	DAZAP1	GEXP	19	1407584	1435682	N:GEXP:TCOF1:chr5:149737202:149779871:+:6949	TCOF1	GEXP	5	149737202	149779871	500000000	61.3	69.4	0.556	844
N:GEXP:PIF1:chr15:65107833:65117838:-:80119	PIF1	GEXP	15	65107833	65117838	N:GEXP:TCOF1:chr5:149737202:149779871:+:6949	TCOF1	GEXP	5	149737202	149779871	500000000	61.1	69.1	0.556	844
N:GEXP:NASP:chr1:46049660:46084578:+:4678	NASP	GEXP	1	46049660	46084578	N:GEXP:TCOF1:chr5:149737202:149779871:+:6949	TCOF1	GEXP	5	149737202	149779871	500000000	60.7	68.8	0.555	844
N:GEXP:HNRNPAB:chr5:177631508:177638184:+:3182	HNRNPAB	GEXP	5	177631508	177638184	N:GEXP:TCOF1:chr5:149737202:149779871:+:6949	TCOF1	GEXP	5	149737202	149779871	27851637	60	68.1	0.552	844
N:GEXP:PPAN:chr19:10216898:10221975:+:56342	PPAN	GEXP	19	10216898	10221975	N:GEXP:TCOF1:chr5:149737202:149779871:+:6949	TCOF1	GEXP	5	149737202	149779871	500000000	59.9	68	0.552	844
N:GEXP:SAFB:chr19:5623046:5668489:+:6294	SAFB	GEXP	19	5623046	5668489	N:GEXP:TCOF1:chr5:149737202:149779871:+:6949	TCOF1	GEXP	5	149737202	149779871	500000000	59.4	67.5	0.55	844
N:GEXP:MYBL2:chr20:42295709:42345122:+:4605	MYBL2	GEXP	20	42295709	42345122	N:GEXP:TCOF1:chr5:149737202:149779871:+:6949	TCOF1	GEXP	5	149737202	149779871	500000000	58.5	66.6	0.547	844
N:GEXP:CHAF1A:chr19:4402660:4443394:+:10036	CHAF1A	GEXP	19	4402660	4443394	N:GEXP:TCOF1:chr5:149737202:149779871:+:6949	TCOF1	GEXP	5	149737202	149779871	500000000	58	66.1	0.545	844
N:GEXP:TCOF1:chr5:149737202:149779871:+:6949	TCOF1	GEXP	5	149737202	149779871	N:GEXP:UBE2S:chr19:55912650:55919325:-:27338	UBE2S	GEXP	19	55912650	55919325	500000000	57.6	65.7	0.544	844
N:GEXP:CDC20:chr1:43824626:43828873:+:991	CDC20	GEXP	1	43824626	43828873	N:GEXP:TCOF1:chr5:149737202:149779871:+:6949	TCOF1	GEXP	5	149737202	149779871	500000000	57	65.1	0.542	844
N:GEXP:CDCA3:chr12:6953963:6960456:-:83461	CDCA3	GEXP	12	6953963	6960456	N:GEXP:TCOF1:chr5:149737202:149779871:+:6949	TCOF1	GEXP	5	149737202	149779871	500000000	55.7	63.8	0.537	844
N:GEXP:C17ORF53:chr17:42219274:42239844:+:78995	C17ORF53	GEXP	17	42219274	42239844	N:GEXP:TCOF1:chr5:149737202:149779871:+:6949	TCOF1	GEXP	5	149737202	149779871	500000000	54.5	62.5	0.532	844
N:GEXP:CCDC137:chr17:79633761:79640936:+:339230	CCDC137	GEXP	17	79633761	79640936	N:GEXP:TCOF1:chr5:149737202:149779871:+:6949	TCOF1	GEXP	5	149737202	149779871	500000000	54.3	62.4	0.532	844
N:GEXP:LMNB2:chr19:2428164:2456958:-:84823	LMNB2	GEXP	19	2428164	2456958	N:GEXP:TCOF1:chr5:149737202:149779871:+:6949	TCOF1	GEXP	5	149737202	149779871	500000000	53.9	62	0.53	844
N:GEXP:NAA10:chrX:153195377:153200468:-:8260	NAA10	GEXP	X	153195377	153200468	N:GEXP:TCOF1:chr5:149737202:149779871:+:6949	TCOF1	GEXP	5	149737202	149779871	500000000	53.8	61.9	0.53	844
N:GEXP:RBM10:chrX:47004617:47046214:+:8241	RBM10	GEXP	X	47004617	47046214	N:GEXP:TCOF1:chr5:149737202:149779871:+:6949	TCOF1	GEXP	5	149737202	149779871	500000000	53.6	61.6	0.529	844
N:GEXP:PPM1G:chr2:27604061:27632496:-:5496	PPM1G	GEXP	2	27604061	27632496	N:GEXP:TCOF1:chr5:149737202:149779871:+:6949	TCOF1	GEXP	5	149737202	149779871	500000000	53.3	61.4	0.528	844
N:GEXP:LMNB1:chr5:126112315:126172712:+:4001	LMNB1	GEXP	5	126112315	126172712	N:GEXP:TCOF1:chr5:149737202:149779871:+:6949	TCOF1	GEXP	5	149737202	149779871	23564490	53.2	61.2	0.528	844
N:GEXP:CCDC99:chr5:169010638:169031781:+:54908	CCDC99	GEXP	5	169010638	169031781	N:GEXP:TCOF1:chr5:149737202:149779871:+:6949	TCOF1	GEXP	5	149737202	149779871	19230767	52.9	61	0.527	844
N:GEXP:LYAR:chr4:4269429:4291896:-:55646	LYAR	GEXP	4	4269429	4291896	N:GEXP:TCOF1:chr5:149737202:149779871:+:6949	TCOF1	GEXP	5	149737202	149779871	500000000	52.7	60.8	0.526	844
N:GEXP:SNRPA:chr19:41256759:41271297:+:6626	SNRPA	GEXP	19	41256759	41271297	N:GEXP:TCOF1:chr5:149737202:149779871:+:6949	TCOF1	GEXP	5	149737202	149779871	500000000	52.5	60.6	0.525	844
N:GEXP:ANP32B:chr9:100745489:100778224:+:10541	ANP32B	GEXP	9	100745489	100778224	N:GEXP:TCOF1:chr5:149737202:149779871:+:6949	TCOF1	GEXP	5	149737202	149779871	500000000	52.3	60.3	0.524	844
N:GEXP:RRP9:chr3:51967446:51975922:-:9136	RRP9	GEXP	3	51967446	51975922	N:GEXP:TCOF1:chr5:149737202:149779871:+:6949	TCOF1	GEXP	5	149737202	149779871	500000000	51.9	60	0.523	844
N:GEXP:HAUS8:chr19:17160571:17186343:-:93323	HAUS8	GEXP	19	17160571	17186343	N:GEXP:TCOF1:chr5:149737202:149779871:+:6949	TCOF1	GEXP	5	149737202	149779871	500000000	51.5	59.6	0.521	844
N:GEXP:CDC25A:chr3:48198668:48229801:-:993	CDC25A	GEXP	3	48198668	48229801	N:GEXP:TCOF1:chr5:149737202:149779871:+:6949	TCOF1	GEXP	5	149737202	149779871	500000000	51.5	59.6	0.522	844
N:GEXP:DDX12P:chr12:9570287:9600768:-:440081	DDX12P	GEXP	12	9570287	9600768	N:GEXP:TCOF1:chr5:149737202:149779871:+:6949	TCOF1	GEXP	5	149737202	149779871	500000000	51.5	59.6	0.521	844
N:GEXP:CCNB1:chr5:68462837:68474070:+:891	CCNB1	GEXP	5	68462837	68474070	N:GEXP:TCOF1:chr5:149737202:149779871:+:6949	TCOF1	GEXP	5	149737202	149779871	81263132	51	59.1	0.519	844
N:GEXP:E2F1:chr20:32263292:32274210:-:1869	E2F1	GEXP	20	32263292	32274210	N:GEXP:TCOF1:chr5:149737202:149779871:+:6949	TCOF1	GEXP	5	149737202	149779871	500000000	50.5	58.6	0.517	844
N:GEXP:HAUS7:chrX:152710178:152760978:-:55559	HAUS7	GEXP	X	152710178	152760978	N:GEXP:TCOF1:chr5:149737202:149779871:+:6949	TCOF1	GEXP	5	149737202	149779871	500000000	49.9	57.9	0.515	844
N:GEXP:DKC1:chrX:153991031:154005964:+:1736	DKC1	GEXP	X	153991031	154005964	N:GEXP:TCOF1:chr5:149737202:149779871:+:6949	TCOF1	GEXP	5	149737202	149779871	500000000	49.8	57.9	0.515	844
N:GEXP:PDAP1:chr7:98992298:99006305:-:11333	PDAP1	GEXP	7	98992298	99006305	N:GEXP:TCOF1:chr5:149737202:149779871:+:6949	TCOF1	GEXP	5	149737202	149779871	500000000	49.8	57.9	0.515	844
N:GEXP:CENPW:chr6:126661253:126669754:+:387103	CENPW	GEXP	6	126661253	126669754	N:GEXP:TCOF1:chr5:149737202:149779871:+:6949	TCOF1	GEXP	5	149737202	149779871	500000000	49.7	57.8	0.514	844
N:GEXP:CCHCR1:chr6:31110216:31126015:-:54535	CCHCR1	GEXP	6	31110216	31126015	N:GEXP:TCOF1:chr5:149737202:149779871:+:6949	TCOF1	GEXP	5	149737202	149779871	500000000	49.6	57.7	0.514	844
N:GEXP:TCOF1:chr5:149737202:149779871:+:6949	TCOF1	GEXP	5	149737202	149779871	N:GEXP:ZC3H18:chr16:88636789:88698372:+:124245	ZC3H18	GEXP	16	88636789	88698372	500000000	49.2	57.3	0.513	844
N:GEXP:ALYREF:chr17:79845711:79849462:-:10189	ALYREF	GEXP	17	79845711	79849462	N:GEXP:TCOF1:chr5:149737202:149779871:+:6949	TCOF1	GEXP	5	149737202	149779871	500000000	49.2	57.3	0.512	844
N:GEXP:DDX39A:chr19:14519610:14530195:-:10212	DDX39A	GEXP	19	14519610	14530195	N:GEXP:TCOF1:chr5:149737202:149779871:+:6949	TCOF1	GEXP	5	149737202	149779871	500000000	49.1	57.2	0.512	844
N:GEXP:ATAD3B:chr1:1407164:1444689:+:83858	ATAD3B	GEXP	1	1407164	1444689	N:GEXP:TCOF1:chr5:149737202:149779871:+:6949	TCOF1	GEXP	5	149737202	149779871	500000000	48.7	56.7	0.51	844
N:GEXP:PLK1:chr16:23690201:23701688:+:5347	PLK1	GEXP	16	23690201	23701688	N:GEXP:TCOF1:chr5:149737202:149779871:+:6949	TCOF1	GEXP	5	149737202	149779871	500000000	48.4	56.4	0.509	844
N:GEXP:ATAD3A:chr1:1447523:1470067:+:55210	ATAD3A	GEXP	1	1447523	1470067	N:GEXP:TCOF1:chr5:149737202:149779871:+:6949	TCOF1	GEXP	5	149737202	149779871	500000000	48.1	56.1	0.508	844
N:GEXP:FAM64A:chr17:6347735:6354385:+:54478	FAM64A	GEXP	17	6347735	6354385	N:GEXP:TCOF1:chr5:149737202:149779871:+:6949	TCOF1	GEXP	5	149737202	149779871	500000000	47.9	56	0.507	844
N:GEXP:TCOF1:chr5:149737202:149779871:+:6949	TCOF1	GEXP	5	149737202	149779871	N:GEXP:UBE2C:chr20:44441255:44445596:+:11065	UBE2C	GEXP	20	44441255	44445596	500000000	47.5	55.5	0.506	844
N:GEXP:TCOF1:chr5:149737202:149779871:+:6949	TCOF1	GEXP	5	149737202	149779871	N:GEXP:UTP14A:chrX:129040097:129063738:+:10813	UTP14A	GEXP	X	129040097	129063738	500000000	47.1	55.1	0.504	844
N:GEXP:TCOF1:chr5:149737202:149779871:+:6949	TCOF1	GEXP	5	149737202	149779871	N:GEXP:TIMM44:chr19:7991603:8008708:-:10469	TIMM44	GEXP	19	7991603	8008708	500000000	46.7	54.8	0.502	844
N:GEXP:TCOF1:chr5:149737202:149779871:+:6949	TCOF1	GEXP	5	149737202	149779871	N:GEXP:TONSL:chr8:145654163:145669812:-:4796	TONSL	GEXP	8	145654163	145669812	500000000	46.7	54.7	0.502	844
N:GEXP:RNASEH2A:chr19:12917428:12924462:+:10535	RNASEH2A	GEXP	19	12917428	12924462	N:GEXP:TCOF1:chr5:149737202:149779871:+:6949	TCOF1	GEXP	5	149737202	149779871	500000000	46.4	54.5	0.501	844
N:GEXP:BAX:chr19:49458117:49465055:+:581	BAX	GEXP	19	49458117	49465055	N:GEXP:TCOF1:chr5:149737202:149779871:+:6949	TCOF1	GEXP	5	149737202	149779871	500000000	46.2	54.2	0.5	844
N:GEXP:KIF2C:chr1:45205490:45233438:+:11004	KIF2C	GEXP	1	45205490	45233438	N:GEXP:TCOF1:chr5:149737202:149779871:+:6949	TCOF1	GEXP	5	149737202	149779871	500000000	46.1	54.2	0.5	844
N:GEXP:FOXM1:chr12:2966847:2986321:-:2305	FOXM1	GEXP	12	2966847	2986321	N:GEXP:TCOF1:chr5:149737202:149779871:+:6949	TCOF1	GEXP	5	149737202	149779871	500000000	46	54.1	0.5	844
N:GEXP:C15ORF42:chr15:90118818:90171253:+:90381	C15ORF42	GEXP	15	90118818	90171253	N:GEXP:TCOF1:chr5:149737202:149779871:+:6949	TCOF1	GEXP	5	149737202	149779871	500000000	46	54	0.5	844
N:GEXP:C19ORF48:chr19:51300961:51307974:-:84798	C19ORF48	GEXP	19	51300961	51307974	N:GEXP:TCOF1:chr5:149737202:149779871:+:6949	TCOF1	GEXP	5	149737202	149779871	500000000	45.8	53.9	0.499	844
N:GEXP:PFDN6:chr6:33257378:33258711:+:10471	PFDN6	GEXP	6	33257378	33258711	N:GEXP:TCOF1:chr5:149737202:149779871:+:6949	TCOF1	GEXP	5	149737202	149779871	500000000	45.8	53.8	0.499	844
N:GEXP:ADRM1:chr20:60878027:60883918:+:11047	ADRM1	GEXP	20	60878027	60883918	N:GEXP:TCOF1:chr5:149737202:149779871:+:6949	TCOF1	GEXP	5	149737202	149779871	500000000	45.7	53.7	0.498	844
N:GEXP:NDC80:chr18:2571510:2616634:+:10403	NDC80	GEXP	18	2571510	2616634	N:GEXP:TCOF1:chr5:149737202:149779871:+:6949	TCOF1	GEXP	5	149737202	149779871	500000000	45.6	53.7	0.498	844
N:GEXP:RAD54L:chr1:46713367:46744145:+:8438	RAD54L	GEXP	1	46713367	46744145	N:GEXP:TCOF1:chr5:149737202:149779871:+:6949	TCOF1	GEXP	5	149737202	149779871	500000000	45.5	53.6	0.498	844
N:GEXP:C20ORF20:chr20:61427805:61431945:+:55257	C20ORF20	GEXP	20	61427805	61431945	N:GEXP:TCOF1:chr5:149737202:149779871:+:6949	TCOF1	GEXP	5	149737202	149779871	500000000	45.5	53.6	0.497	844
N:GEXP:LOC642846:chr12:9436253:9466684:+:642846	LOC642846	GEXP	12	9436253	9466684	N:GEXP:TCOF1:chr5:149737202:149779871:+:6949	TCOF1	GEXP	5	149737202	149779871	500000000	45.4	53.5	0.497	844
N:GEXP:CDC25C:chr5:137620959:137674044:-:995	CDC25C	GEXP	5	137620959	137674044	N:GEXP:TCOF1:chr5:149737202:149779871:+:6949	TCOF1	GEXP	5	149737202	149779871	12063158	45.2	53.3	0.496	844
N:GEXP:TCOF1:chr5:149737202:149779871:+:6949	TCOF1	GEXP	5	149737202	149779871	N:GEXP:TRAIP:chr3:49866028:49893992:-:10293	TRAIP	GEXP	3	49866028	49893992	500000000	45.1	53.2	0.496	844
N:GEXP:PKMYT1:chr16:3022792:3030540:-:9088	PKMYT1	GEXP	16	3022792	3030540	N:GEXP:TCOF1:chr5:149737202:149779871:+:6949	TCOF1	GEXP	5	149737202	149779871	500000000	45.1	53.1	0.496	844
N:GEXP:DDX11:chr12:31226779:31257725:+:1663	DDX11	GEXP	12	31226779	31257725	N:GEXP:TCOF1:chr5:149737202:149779871:+:6949	TCOF1	GEXP	5	149737202	149779871	500000000	45.1	53.1	0.496	844
N:GEXP:CCNE1:chr19:30302901:30315215:+:898	CCNE1	GEXP	19	30302901	30315215	N:GEXP:TCOF1:chr5:149737202:149779871:+:6949	TCOF1	GEXP	5	149737202	149779871	500000000	44.8	52.9	0.495	844
N:GEXP:MRPS5:chr2:95752952:95787754:-:64969	MRPS5	GEXP	2	95752952	95787754	N:GEXP:TCOF1:chr5:149737202:149779871:+:6949	TCOF1	GEXP	5	149737202	149779871	500000000	44.8	52.9	0.495	844
N:GEXP:CPSF4:chr7:99036563:99054996:+:10898	CPSF4	GEXP	7	99036563	99054996	N:GEXP:TCOF1:chr5:149737202:149779871:+:6949	TCOF1	GEXP	5	149737202	149779871	500000000	44.7	52.7	0.494	844
N:GEXP:RCC1:chr1:28832455:28865708:+:1104	RCC1	GEXP	1	28832455	28865708	N:GEXP:TCOF1:chr5:149737202:149779871:+:6949	TCOF1	GEXP	5	149737202	149779871	500000000	44.4	52.5	0.493	844
N:GEXP:TCOF1:chr5:149737202:149779871:+:6949	TCOF1	GEXP	5	149737202	149779871	N:GEXP:WDR4:chr21:44263204:44299699:-:10785	WDR4	GEXP	21	44263204	44299699	500000000	44.3	52.4	0.493	844
N:GEXP:SNRPD1:chr18:19192260:19210208:+:6632	SNRPD1	GEXP	18	19192260	19210208	N:GEXP:TCOF1:chr5:149737202:149779871:+:6949	TCOF1	GEXP	5	149737202	149779871	500000000	44.3	52.4	0.493	844
N:GEXP:RECQL4:chr8:145736667:145743210:-:9401	RECQL4	GEXP	8	145736667	145743210	N:GEXP:TCOF1:chr5:149737202:149779871:+:6949	TCOF1	GEXP	5	149737202	149779871	500000000	44.3	52.4	0.493	844
N:GEXP:AZI1:chr17:79163393:79196751:-:22994	AZI1	GEXP	17	79163393	79196751	N:GEXP:TCOF1:chr5:149737202:149779871:+:6949	TCOF1	GEXP	5	149737202	149779871	500000000	44.3	52.4	0.493	844
N:GEXP:TCOF1:chr5:149737202:149779871:+:6949	TCOF1	GEXP	5	149737202	149779871	N:GEXP:TRMT61A:chr14:103995509:104003410:+:115708	TRMT61A	GEXP	14	103995509	104003410	500000000	44.2	52.3	0.492	844
N:GEXP:RFC4:chr3:186507682:186524484:-:5984	RFC4	GEXP	3	186507682	186524484	N:GEXP:TCOF1:chr5:149737202:149779871:+:6949	TCOF1	GEXP	5	149737202	149779871	500000000	44.2	52.3	0.492	844
N:GEXP:MCM3:chr6:52128812:52149582:-:4172	MCM3	GEXP	6	52128812	52149582	N:GEXP:TCOF1:chr5:149737202:149779871:+:6949	TCOF1	GEXP	5	149737202	149779871	500000000	44.1	52.2	0.492	844
N:GEXP:HMGA1:chr6:34204577:34214008:+:3159	HMGA1	GEXP	6	34204577	34214008	N:GEXP:TCOF1:chr5:149737202:149779871:+:6949	TCOF1	GEXP	5	149737202	149779871	500000000	44.2	52.2	0.492	844
N:GEXP:TCOF1:chr5:149737202:149779871:+:6949	TCOF1	GEXP	5	149737202	149779871	N:GEXP:TPX2:chr20:30326904:30389603:+:22974	TPX2	GEXP	20	30326904	30389603	500000000	44	52	0.491	844
N:GEXP:FAM72B:chr1:120839005:120855681:+:653820	FAM72B	GEXP	1	120839005	120855681	N:GEXP:TCOF1:chr5:149737202:149779871:+:6949	TCOF1	GEXP	5	149737202	149779871	500000000	43.9	52	0.491	844
N:GEXP:HAUS5:chr19:36103646:36116251:+:23354	HAUS5	GEXP	19	36103646	36116251	N:GEXP:TCOF1:chr5:149737202:149779871:+:6949	TCOF1	GEXP	5	149737202	149779871	500000000	43.8	51.8	0.49	844
N:GEXP:TCOF1:chr5:149737202:149779871:+:6949	TCOF1	GEXP	5	149737202	149779871	N:GEXP:ZNF695:chr1:247108849:247242115:-:57116	ZNF695	GEXP	1	247108849	247242115	500000000	43.7	51.7	0.49	844
N:GEXP:TCOF1:chr5:149737202:149779871:+:6949	TCOF1	GEXP	5	149737202	149779871	N:GEXP:TOP1MT:chr8:144391528:144442149:-:116447	TOP1MT	GEXP	8	144391528	144442149	500000000	43.5	51.6	0.489	844
N:GEXP:ORC6:chr16:46723558:46732306:+:23594	ORC6	GEXP	16	46723558	46732306	N:GEXP:TCOF1:chr5:149737202:149779871:+:6949	TCOF1	GEXP	5	149737202	149779871	500000000	43.6	51.6	0.489	844
N:GEXP:ECE2:chr3:183967445:184010819:+:9718	ECE2	GEXP	3	183967445	184010819	N:GEXP:TCOF1:chr5:149737202:149779871:+:6949	TCOF1	GEXP	5	149737202	149779871	500000000	43.2	51.3	0.488	844
N:GEXP:DDX49:chr19:19030484:19039442:+:54555	DDX49	GEXP	19	19030484	19039442	N:GEXP:TCOF1:chr5:149737202:149779871:+:6949	TCOF1	GEXP	5	149737202	149779871	500000000	43.1	51.2	0.488	844
N:GEXP:NUF2:chr1:163291723:163325553:+:83540	NUF2	GEXP	1	163291723	163325553	N:GEXP:TCOF1:chr5:149737202:149779871:+:6949	TCOF1	GEXP	5	149737202	149779871	500000000	43	51	0.487	844
N:GEXP:RDBP:chr6:31919864:31926864:-:7936	RDBP	GEXP	6	31919864	31926864	N:GEXP:TCOF1:chr5:149737202:149779871:+:6949	TCOF1	GEXP	5	149737202	149779871	500000000	42.9	51	0.487	844
N:GEXP:CDCA8:chr1:38158159:38175391:+:55143	CDCA8	GEXP	1	38158159	38175391	N:GEXP:TCOF1:chr5:149737202:149779871:+:6949	TCOF1	GEXP	5	149737202	149779871	500000000	42.9	50.9	0.486	844
N:GEXP:EZH2:chr7:148504464:148581441:-:2146	EZH2	GEXP	7	148504464	148581441	N:GEXP:TCOF1:chr5:149737202:149779871:+:6949	TCOF1	GEXP	5	149737202	149779871	500000000	42.7	50.8	0.486	844
N:GEXP:C11ORF84:chr11:63580923:63595190:+:144097	C11ORF84	GEXP	11	63580923	63595190	N:GEXP:TCOF1:chr5:149737202:149779871:+:6949	TCOF1	GEXP	5	149737202	149779871	500000000	42.7	50.8	0.486	844
N:GEXP:C16ORF59:chr16:2510115:2514964:+:80178	C16ORF59	GEXP	16	2510115	2514964	N:GEXP:TCOF1:chr5:149737202:149779871:+:6949	TCOF1	GEXP	5	149737202	149779871	500000000	42.8	50.8	0.486	844
N:GEXP:MND1:chr4:154265801:154336247:+:84057	MND1	GEXP	4	154265801	154336247	N:GEXP:TCOF1:chr5:149737202:149779871:+:6949	TCOF1	GEXP	5	149737202	149779871	500000000	42.7	50.8	0.486	844
N:GEXP:FLAD1:chr1:154955770:154965587:+:80308	FLAD1	GEXP	1	154955770	154965587	N:GEXP:TCOF1:chr5:149737202:149779871:+:6949	TCOF1	GEXP	5	149737202	149779871	500000000	42.6	50.7	0.486	844
N:GEXP:TCOF1:chr5:149737202:149779871:+:6949	TCOF1	GEXP	5	149737202	149779871	N:GEXP:UPF3B:chrX:118967989:118986991:-:65109	UPF3B	GEXP	X	118967989	118986991	500000000	42.5	50.6	0.485	844
N:GEXP:TBRG4:chr7:45139699:45151317:-:9238	TBRG4	GEXP	7	45139699	45151317	N:GEXP:TCOF1:chr5:149737202:149779871:+:6949	TCOF1	GEXP	5	149737202	149779871	500000000	42.5	50.6	0.485	844
N:GEXP:MRPL11:chr11:66202550:66206310:-:65003	MRPL11	GEXP	11	66202550	66206310	N:GEXP:TCOF1:chr5:149737202:149779871:+:6949	TCOF1	GEXP	5	149737202	149779871	500000000	42.5	50.6	0.485	844
N:GEXP:FANCA:chr16:89803959:89883065:-:2175	FANCA	GEXP	16	89803959	89883065	N:GEXP:TCOF1:chr5:149737202:149779871:+:6949	TCOF1	GEXP	5	149737202	149779871	500000000	42.3	50.4	0.484	844
N:GEXP:TCOF1:chr5:149737202:149779871:+:6949	TCOF1	GEXP	5	149737202	149779871	N:GEXP:TRIP13:chr5:892969:918164:+:9319	TRIP13	GEXP	5	892969	918164	148819038	42.2	50.3	0.484	844
N:GEXP:CCNB2:chr15:59397284:59417244:+:9133	CCNB2	GEXP	15	59397284	59417244	N:GEXP:TCOF1:chr5:149737202:149779871:+:6949	TCOF1	GEXP	5	149737202	149779871	500000000	42.1	50.2	0.483	844
N:GEXP:MCM2:chr3:127317253:127341278:+:4171	MCM2	GEXP	3	127317253	127341278	N:GEXP:TCOF1:chr5:149737202:149779871:+:6949	TCOF1	GEXP	5	149737202	149779871	500000000	42	50.1	0.483	844
N:GEXP:FEN1:chr11:61560109:61564714:+:2237	FEN1	GEXP	11	61560109	61564714	N:GEXP:TCOF1:chr5:149737202:149779871:+:6949	TCOF1	GEXP	5	149737202	149779871	500000000	41.8	49.9	0.482	844
N:GEXP:HJURP:chr2:234745486:234763212:-:55355	HJURP	GEXP	2	234745486	234763212	N:GEXP:TCOF1:chr5:149737202:149779871:+:6949	TCOF1	GEXP	5	149737202	149779871	500000000	41.7	49.8	0.481	844
N:GEXP:MRPL12:chr17:79670399:79674556:+:6182	MRPL12	GEXP	17	79670399	79674556	N:GEXP:TCOF1:chr5:149737202:149779871:+:6949	TCOF1	GEXP	5	149737202	149779871	500000000	41.7	49.8	0.482	844
N:GEXP:SKA1:chr18:47901392:47920538:+:220134	SKA1	GEXP	18	47901392	47920538	N:GEXP:TCOF1:chr5:149737202:149779871:+:6949	TCOF1	GEXP	5	149737202	149779871	500000000	41.6	49.7	0.481	844
N:GEXP:CDC45:chr22:19467414:19508135:+:8318	CDC45	GEXP	22	19467414	19508135	N:GEXP:TCOF1:chr5:149737202:149779871:+:6949	TCOF1	GEXP	5	149737202	149779871	500000000	41.6	49.6	0.481	844
N:GEXP:TCOF1:chr5:149737202:149779871:+:6949	TCOF1	GEXP	5	149737202	149779871	N:GEXP:TUBA1C:chr12:49621709:49667113:+:84790	TUBA1C	GEXP	12	49621709	49667113	500000000	41.2	49.3	0.48	844
N:GEXP:ESPL1:chr12:53662083:53687427:+:9700	ESPL1	GEXP	12	53662083	53687427	N:GEXP:TCOF1:chr5:149737202:149779871:+:6949	TCOF1	GEXP	5	149737202	149779871	500000000	41.2	49.3	0.48	844
N:GEXP:MIIP:chr1:12079299:12092106:+:60672	MIIP	GEXP	1	12079299	12092106	N:GEXP:TCOF1:chr5:149737202:149779871:+:6949	TCOF1	GEXP	5	149737202	149779871	500000000	40.7	48.8	0.477	844
N:GEXP:HMMR:chr5:162887517:162918953:+:3161	HMMR	GEXP	5	162887517	162918953	N:GEXP:TCOF1:chr5:149737202:149779871:+:6949	TCOF1	GEXP	5	149737202	149779871	13107646	40.8	48.8	0.477	844
N:GEXP:TCOF1:chr5:149737202:149779871:+:6949	TCOF1	GEXP	5	149737202	149779871	N:GEXP:WDR46:chr6:33246880:33257304:-:9277	WDR46	GEXP	6	33246880	33257304	500000000	40.6	48.6	0.477	844
N:GEXP:ILF3:chr19:10764937:10803095:+:3609	ILF3	GEXP	19	10764937	10803095	N:GEXP:TCOF1:chr5:149737202:149779871:+:6949	TCOF1	GEXP	5	149737202	149779871	500000000	40.5	48.6	0.476	844
N:GEXP:EXO1:chr1:242011493:242053241:+:9156	EXO1	GEXP	1	242011493	242053241	N:GEXP:TCOF1:chr5:149737202:149779871:+:6949	TCOF1	GEXP	5	149737202	149779871	500000000	40.6	48.6	0.476	844
N:GEXP:BYSL:chr6:41888965:41900784:+:705	BYSL	GEXP	6	41888965	41900784	N:GEXP:TCOF1:chr5:149737202:149779871:+:6949	TCOF1	GEXP	5	149737202	149779871	500000000	40.4	48.5	0.476	844
N:GEXP:CTU2:chr16:88772891:88781786:+:348180	CTU2	GEXP	16	88772891	88781786	N:GEXP:TCOF1:chr5:149737202:149779871:+:6949	TCOF1	GEXP	5	149737202	149779871	500000000	40.2	48.3	0.475	844
N:GEXP:RBM38:chr20:55966454:55984386:+:55544	RBM38	GEXP	20	55966454	55984386	N:GEXP:TCOF1:chr5:149737202:149779871:+:6949	TCOF1	GEXP	5	149737202	149779871	500000000	40.1	48.2	0.474	844
N:GEXP:PSRC1:chr1:109822176:109825808:-:84722	PSRC1	GEXP	1	109822176	109825808	N:GEXP:TCOF1:chr5:149737202:149779871:+:6949	TCOF1	GEXP	5	149737202	149779871	500000000	40	48.1	0.474	844
N:GEXP:PDCD5:chr19:33072094:33078358:+:9141	PDCD5	GEXP	19	33072094	33078358	N:GEXP:TCOF1:chr5:149737202:149779871:+:6949	TCOF1	GEXP	5	149737202	149779871	500000000	40	48.1	0.474	844
N:GEXP:TCOF1:chr5:149737202:149779871:+:6949	TCOF1	GEXP	5	149737202	149779871	N:MIRN:HSA-MIR-18A:chr13:92003005:92003075:+:	HSA-MIR-18A	MIRN	13	92003005	92003075	500000000	36.6	43.5	0.458	824
N:GEXP:TCOF1:chr5:149737202:149779871:+:6949	TCOF1	GEXP	5	149737202	149779871	N:SAMP:ROR_S:::::	ROR S	SAMP				500000000	33	38.7	0.458	728
N:GEXP:TCOF1:chr5:149737202:149779871:+:6949	TCOF1	GEXP	5	149737202	149779871	N:SAMP:Prolif_Score:::::	Prolif Score	SAMP				500000000	32.6	38.3	0.456	728
N:GEXP:TCOF1:chr5:149737202:149779871:+:6949	TCOF1	GEXP	5	149737202	149779871	N:MIRN:HSA-MIR-17:chr13:92002859:92002942:+:	HSA-MIR-17	MIRN	13	92002859	92002942	500000000	30.3	37.2	0.426	824
N:GEXP:TCOF1:chr5:149737202:149779871:+:6949	TCOF1	GEXP	5	149737202	149779871	N:SAMP:ROR_P:::::	ROR P	SAMP				500000000	31.2	36.9	0.449	728
N:GEXP:TCOF1:chr5:149737202:149779871:+:6949	TCOF1	GEXP	5	149737202	149779871	N:SAMP:Pam50_basal:::::	Pam50 basal	SAMP				500000000	28.5	34.2	0.433	728
N:GEXP:TCOF1:chr5:149737202:149779871:+:6949	TCOF1	GEXP	5	149737202	149779871	N:RPPA:CCNB1:chr5:68462837:68474070:+:Cyclin_B1-R-V	CCNB1	RPPA	5	68462837	68474070	81263132	23.1	29.5	0.529	395
N:GEXP:TCOF1:chr5:149737202:149779871:+:6949	TCOF1	GEXP	5	149737202	149779871	N:RPPA:MSH2:chr2:47630206:47906510:+:MSH2-M-C	MSH2	RPPA	2	47630206	47906510	500000000	13.7	20.1	0.444	395
N:GEXP:TCOF1:chr5:149737202:149779871:+:6949	TCOF1	GEXP	5	149737202	149779871	N:RPPA:CCNE1:chr19:30302901:30315215:+:Cyclin_E1-M-V	CCNE1	RPPA	19	30302901	30315215	500000000	11.5	17.9	0.42	395
N:GEXP:TCOF1:chr5:149737202:149779871:+:6949	TCOF1	GEXP	5	149737202	149779871	N:RPPA:CDK1:chr10:62538089:62554610:+:CDK1-R-V	CDK1	RPPA	10	62538089	62554610	500000000	10.2	16.6	0.405	395

## Sheet: COAD+READ
id_a	pretty_label_a	datatype_a	chr_a	start_a	end_a	id_b	pretty_label_b	datatype_b	chr_b	start_b	end_b	link_distance	adj_logged_pvalue	logged_pvalue	correlation	num_nonna
N:GEXP:ILF3:chr19:10642281:10656141:+:	ILF3	GEXP	19	10642281	10656141	N:GEXP:TCOF1:chr5:149717502:149758804:+:	TCOF1	GEXP	5	149717502	149758804	500000000	31.1	39.4	0.694	270
N:GEXP:RBM19:chr12:112745411:112888415:-:	RBM19	GEXP	12	112745411	112888415	N:GEXP:TCOF1:chr5:149717502:149758804:+:	TCOF1	GEXP	5	149717502	149758804	500000000	30.6	38.9	0.691	270
N:GEXP:POLE:chr12:131711355:131773974:-:	POLE	GEXP	12	131711355	131773974	N:GEXP:TCOF1:chr5:149717502:149758804:+:	TCOF1	GEXP	5	149717502	149758804	500000000	29.7	38	0.685	270
N:GEXP:SAFB:chr19:5574216:5619302:+:	SAFB	GEXP	19	5574216	5619302	N:GEXP:TCOF1:chr5:149717502:149758804:+:	TCOF1	GEXP	5	149717502	149758804	500000000	29.1	37.5	0.681	270
N:GEXP:SRRT:chr7:100311147:100324106:+:	SRRT	GEXP	7	100311147	100324106	N:GEXP:TCOF1:chr5:149717502:149758804:+:	TCOF1	GEXP	5	149717502	149758804	500000000	28.8	37.1	0.679	270
N:GEXP:PDCD11:chr10:105148173:105195296:+:	PDCD11	GEXP	10	105148173	105195296	N:GEXP:TCOF1:chr5:149717502:149758804:+:	TCOF1	GEXP	5	149717502	149758804	500000000	27.8	36.1	0.672	270
N:GEXP:TCOF1:chr5:149717502:149758804:+:	TCOF1	GEXP	5	149717502	149758804	N:MIRN:hsa-mir-106b:chr7:99529552:99529633:-:	hsa-mir-106b	MIRN	7	99529552	99529633	500000000	6.2	13.4	0.455	249

## Sheet: CRC
id_a	pretty_label_a	datatype_a	chr_a	start_a	end_a	id_b	pretty_label_b	datatype_b	chr_b	start_b	end_b	link_distance	adj_logged_pvalue	logged_pvalue	correlation	num_nonna
N:GEXP:LARP1:chr5:154092462:154197167:+:23367	LARP1	GEXP	5	154092462	154197167	N:GEXP:TCOF1:chr5:149737202:149779871:+:6949	TCOF1	GEXP	5	149737202	149779871	4312591	76.1	84.2	0.7	563
N:GEXP:NCL:chr2:232318242:232348352:-:4691	NCL	GEXP	2	232318242	232348352	N:GEXP:TCOF1:chr5:149737202:149779871:+:6949	TCOF1	GEXP	5	149737202	149779871	500000000	72.6	80.6	0.69	563
N:GEXP:GEMIN5:chr5:154266976:154317769:-:25929	GEMIN5	GEXP	5	154266976	154317769	N:GEXP:TCOF1:chr5:149737202:149779871:+:6949	TCOF1	GEXP	5	149737202	149779871	4487105	65.5	73.6	0.67	563
N:GEXP:MKI67:chr10:129894923:129924649:-:4288	MKI67	GEXP	10	129894923	129924649	N:GEXP:TCOF1:chr5:149737202:149779871:+:6949	TCOF1	GEXP	5	149737202	149779871	500000000	57.5	65.6	0.64	563
N:GEXP:ILF3:chr19:10764937:10803093:+:3609	ILF3	GEXP	19	10764937	10803093	N:GEXP:TCOF1:chr5:149737202:149779871:+:6949	TCOF1	GEXP	5	149737202	149779871	500000000	56.6	64.7	0.64	563
N:GEXP:TAF15:chr17:34136459:34191619:+:8148	TAF15	GEXP	17	34136459	34191619	N:GEXP:TCOF1:chr5:149737202:149779871:+:6949	TCOF1	GEXP	5	149737202	149779871	500000000	52.3	60.4	0.62	563
N:GEXP:CKAP5:chr11:46764598:46867847:-:9793	CKAP5	GEXP	11	46764598	46867847	N:GEXP:TCOF1:chr5:149737202:149779871:+:6949	TCOF1	GEXP	5	149737202	149779871	500000000	51.7	59.8	0.62	563
N:GEXP:CENPF:chr1:214776538:214837931:+:1063	CENPF	GEXP	1	214776538	214837931	N:GEXP:TCOF1:chr5:149737202:149779871:+:6949	TCOF1	GEXP	5	149737202	149779871	500000000	51.7	59.7	0.62	563
N:GEXP:PDCD11:chr10:105156405:105206049:+:22984	PDCD11	GEXP	10	105156405	105206049	N:GEXP:TCOF1:chr5:149737202:149779871:+:6949	TCOF1	GEXP	5	149737202	149779871	500000000	51.3	59.3	0.62	563
N:GEXP:HNRNPA2B1:chr7:26229547:26241149:-:3181	HNRNPA2B1	GEXP	7	26229547	26241149	N:GEXP:TCOF1:chr5:149737202:149779871:+:6949	TCOF1	GEXP	5	149737202	149779871	500000000	49.4	57.5	0.61	563
N:GEXP:EWSR1:chr22:29663998:29696515:+:2130	EWSR1	GEXP	22	29663998	29696515	N:GEXP:TCOF1:chr5:149737202:149779871:+:6949	TCOF1	GEXP	5	149737202	149779871	500000000	49.3	57.3	0.61	563
N:GEXP:AATF:chr17:35306175:35414171:+:26574	AATF	GEXP	17	35306175	35414171	N:GEXP:TCOF1:chr5:149737202:149779871:+:6949	TCOF1	GEXP	5	149737202	149779871	500000000	48.7	56.8	0.6	563
N:GEXP:HNRNPU:chr1:245014468:245027844:-:3192	HNRNPU	GEXP	1	245014468	245027844	N:GEXP:TCOF1:chr5:149737202:149779871:+:6949	TCOF1	GEXP	5	149737202	149779871	500000000	48.6	56.6	0.6	563
N:GEXP:NOP58:chr2:203130439:203168389:+:51602	NOP58	GEXP	2	203130439	203168389	N:GEXP:TCOF1:chr5:149737202:149779871:+:6949	TCOF1	GEXP	5	149737202	149779871	500000000	47.3	55.4	0.6	563
N:GEXP:SAFB2:chr19:5587010:5624057:-:9667	SAFB2	GEXP	19	5587010	5624057	N:GEXP:TCOF1:chr5:149737202:149779871:+:6949	TCOF1	GEXP	5	149737202	149779871	500000000	46.9	55	0.6	563
N:GEXP:BAZ1B:chr7:72854728:72936608:-:9031	BAZ1B	GEXP	7	72854728	72936608	N:GEXP:TCOF1:chr5:149737202:149779871:+:6949	TCOF1	GEXP	5	149737202	149779871	500000000	45.9	54	0.59	563
N:GEXP:SRRT:chr7:100472733:100486285:+:51593	SRRT	GEXP	7	100472733	100486285	N:GEXP:TCOF1:chr5:149737202:149779871:+:6949	TCOF1	GEXP	5	149737202	149779871	500000000	45.7	53.8	0.59	563
N:GEXP:SAFB:chr19:5623046:5668489:+:6294	SAFB	GEXP	19	5623046	5668489	N:GEXP:TCOF1:chr5:149737202:149779871:+:6949	TCOF1	GEXP	5	149737202	149779871	500000000	45.2	53.3	0.59	563
N:GEXP:DNAJC2:chr7:102952921:102985320:-:27000	DNAJC2	GEXP	7	102952921	102985320	N:GEXP:TCOF1:chr5:149737202:149779871:+:6949	TCOF1	GEXP	5	149737202	149779871	500000000	44.5	52.5	0.59	563
N:GEXP:TCERG1:chr5:145826874:145891524:+:10915	TCERG1	GEXP	5	145826874	145891524	N:GEXP:TCOF1:chr5:149737202:149779871:+:6949	TCOF1	GEXP	5	149737202	149779871	3845678	42.5	50.5	0.58	563
N:GEXP:KRI1:chr19:10663761:10676713:-:65095	KRI1	GEXP	19	10663761	10676713	N:GEXP:TCOF1:chr5:149737202:149779871:+:6949	TCOF1	GEXP	5	149737202	149779871	500000000	42.2	50.2	0.58	563
N:GEXP:DNAJC7:chr17:40128451:40173394:-:7266	DNAJC7	GEXP	17	40128451	40173394	N:GEXP:TCOF1:chr5:149737202:149779871:+:6949	TCOF1	GEXP	5	149737202	149779871	500000000	41.9	50	0.57	563
N:GEXP:RRP12:chr10:99116115:99161127:-:23223	RRP12	GEXP	10	99116115	99161127	N:GEXP:TCOF1:chr5:149737202:149779871:+:6949	TCOF1	GEXP	5	149737202	149779871	500000000	41.2	49.3	0.57	563
N:GEXP:GPATCH4:chr1:156564279:156571288:-:54865	GPATCH4	GEXP	1	156564279	156571288	N:GEXP:TCOF1:chr5:149737202:149779871:+:6949	TCOF1	GEXP	5	149737202	149779871	500000000	40.7	48.7	0.57	563
N:GEXP:ACIN1:chr14:23527773:23564823:-:22985	ACIN1	GEXP	14	23527773	23564823	N:GEXP:TCOF1:chr5:149737202:149779871:+:6949	TCOF1	GEXP	5	149737202	149779871	500000000	40.6	48.6	0.57	563
N:GEXP:RBM19:chr12:114254543:114404176:-:9904	RBM19	GEXP	12	114254543	114404176	N:GEXP:TCOF1:chr5:149737202:149779871:+:6949	TCOF1	GEXP	5	149737202	149779871	500000000	40.3	48.4	0.57	563
N:GEXP:EIF5B:chr2:99953816:100017789:+:9669	EIF5B	GEXP	2	99953816	100017789	N:GEXP:TCOF1:chr5:149737202:149779871:+:6949	TCOF1	GEXP	5	149737202	149779871	500000000	40	48.1	0.56	563
N:GEXP:BMS1:chr10:43278249:43330385:+:9790	BMS1	GEXP	10	43278249	43330385	N:GEXP:TCOF1:chr5:149737202:149779871:+:6949	TCOF1	GEXP	5	149737202	149779871	500000000	40	48.1	0.56	563
N:GEXP:KPNB1:chr17:45726842:45762871:+:3837	KPNB1	GEXP	17	45726842	45762871	N:GEXP:TCOF1:chr5:149737202:149779871:+:6949	TCOF1	GEXP	5	149737202	149779871	500000000	39.7	47.8	0.56	563
N:GEXP:TCOF1:chr5:149737202:149779871:+:6949	TCOF1	GEXP	5	149737202	149779871	N:GEXP:UBTF:chr17:42282401:42298994:-:7343	UBTF	GEXP	17	42282401	42298994	500000000	39.6	47.7	0.56	563
N:GEXP:MDC1:chr6:30667584:30685666:-:9656	MDC1	GEXP	6	30667584	30685666	N:GEXP:TCOF1:chr5:149737202:149779871:+:6949	TCOF1	GEXP	5	149737202	149779871	500000000	38.8	46.9	0.56	563
N:GEXP:PRRC2A:chr6:31588450:31605554:+:7916	PRRC2A	GEXP	6	31588450	31605554	N:GEXP:TCOF1:chr5:149737202:149779871:+:6949	TCOF1	GEXP	5	149737202	149779871	500000000	38.5	46.6	0.56	563
N:GEXP:ODF2:chr9:131217465:131263571:+:4957	ODF2	GEXP	9	131217465	131263571	N:GEXP:TCOF1:chr5:149737202:149779871:+:6949	TCOF1	GEXP	5	149737202	149779871	500000000	38	46	0.55	563
N:GEXP:TCOF1:chr5:149737202:149779871:+:6949	TCOF1	GEXP	5	149737202	149779871	N:GEXP:ZNF629:chr16:30789778:30798523:-:23361	ZNF629	GEXP	16	30789778	30798523	500000000	37.1	45.2	0.55	563
N:GEXP:CD3EAP:chr19:45909467:45914024:+:10849	CD3EAP	GEXP	19	45909467	45914024	N:GEXP:TCOF1:chr5:149737202:149779871:+:6949	TCOF1	GEXP	5	149737202	149779871	500000000	36.6	44.6	0.55	563
N:GEXP:SPAG5:chr17:26904588:26926297:-:10615	SPAG5	GEXP	17	26904588	26926297	N:GEXP:TCOF1:chr5:149737202:149779871:+:6949	TCOF1	GEXP	5	149737202	149779871	500000000	36.5	44.6	0.55	563
N:GEXP:SSRP1:chr11:57093459:57103351:-:6749	SSRP1	GEXP	11	57093459	57103351	N:GEXP:TCOF1:chr5:149737202:149779871:+:6949	TCOF1	GEXP	5	149737202	149779871	500000000	36.2	44.3	0.55	563
N:GEXP:NSD1:chr5:176560026:176727216:+:64324	NSD1	GEXP	5	176560026	176727216	N:GEXP:TCOF1:chr5:149737202:149779871:+:6949	TCOF1	GEXP	5	149737202	149779871	26780155	35.9	44	0.54	563
N:GEXP:IK:chr5:140026643:140042064:+:3550	IK	GEXP	5	140026643	140042064	N:GEXP:TCOF1:chr5:149737202:149779871:+:6949	TCOF1	GEXP	5	149737202	149779871	9695138	35.8	43.9	0.54	563
N:GEXP:TCOF1:chr5:149737202:149779871:+:6949	TCOF1	GEXP	5	149737202	149779871	N:GEXP:TRRAP:chr7:98475556:98610866:+:8295	TRRAP	GEXP	7	98475556	98610866	500000000	35.7	43.8	0.54	563
N:GEXP:PNN:chr14:39644387:39652422:+:5411	PNN	GEXP	14	39644387	39652422	N:GEXP:TCOF1:chr5:149737202:149779871:+:6949	TCOF1	GEXP	5	149737202	149779871	500000000	35.7	43.8	0.54	563
N:GEXP:TCOF1:chr5:149737202:149779871:+:6949	TCOF1	GEXP	5	149737202	149779871	N:MIRN:hsa-miR-1307-3p:chr10:105154010:105154158:+:MIMAT0005951	hsa-miR-1307-3p	MIRN	10	105154010	105154158	500000000	28.1	35.1	0.5	545
N:GEXP:TCOF1:chr5:149737202:149779871:+:6949	TCOF1	GEXP	5	149737202	149779871	C:SAMP:mirnPlatform:::::seq	mirnPlatform	SAMP				500000000	27.9	33.6	0.52	545
N:GEXP:TCOF1:chr5:149737202:149779871:+:6949	TCOF1	GEXP	5	149737202	149779871	B:SAMP:I(IlluminaHiSeq_miRNASeq|mirnPlatform):::::seq	mirnPlatform IlluminaHiSeq_miRNASeq	SAMP				500000000	27.1	33.6	0.52	545
N:GEXP:TCOF1:chr5:149737202:149779871:+:6949	TCOF1	GEXP	5	149737202	149779871	N:MIRN:hsa-miR-106b-3p:chr7:99691616:99691697:+:MIMAT0004672	hsa-miR-106b-3p	MIRN	7	99691616	99691697	500000000	24.9	31.9	0.48	545
N:GEXP:TCOF1:chr5:149737202:149779871:+:6949	TCOF1	GEXP	5	149737202	149779871	N:MIRN:hsa-let-7f-5p:chr9:96938629:96938715:+:MIMAT0000067	hsa-let-7f-5p	MIRN	9	96938629	96938715	500000000	24.1	31.2	0.47	545
N:GEXP:TCOF1:chr5:149737202:149779871:+:6949	TCOF1	GEXP	5	149737202	149779871	C:SAMP:gexpPlatform:::::seq	gexpPlatform	SAMP				500000000	24.7	30.4	0.49	563
N:GEXP:TCOF1:chr5:149737202:149779871:+:6949	TCOF1	GEXP	5	149737202	149779871	B:SAMP:I(IlluminaHiSeq_RNASeqV2|gexpPlatform):::::seq	gexpPlatform IlluminaHiSeq_RNASeqV2	SAMP				500000000	23.9	30.4	0.49	563
N:GEXP:TCOF1:chr5:149737202:149779871:+:6949	TCOF1	GEXP	5	149737202	149779871	N:MIRN:hsa-miR-92a-3p:chr13:92003568:92003645:+:MIMAT0000092	hsa-miR-92a-3p	MIRN	13	92003568	92003645	500000000	22.3	29.3	0.46	545
N:GEXP:TCOF1:chr5:149737202:149779871:+:6949	TCOF1	GEXP	5	149737202	149779871	N:MIRN:hsa-miR-1180:chr17:19247819:19247887:+:MIMAT0005825	hsa-miR-1180	MIRN	17	19247819	19247887	500000000	21.9	28.9	0.46	545
N:GEXP:TCOF1:chr5:149737202:149779871:+:6949	TCOF1	GEXP	5	149737202	149779871	N:MIRN:hsa-miR-340-5p:chr5:179442303:179442397:+:MIMAT0004692	hsa-miR-340-5p	MIRN	5	179442303	179442397	29662432	21.1	28.2	0.45	545
N:GEXP:TCOF1:chr5:149737202:149779871:+:6949	TCOF1	GEXP	5	149737202	149779871	N:MIRN:hsa-miR-361-5p:chrX:85158641:85158712:+:MIMAT0000703	hsa-miR-361-5p	MIRN	X	85158641	85158712	500000000	20.6	27.6	0.45	545
N:GEXP:TCOF1:chr5:149737202:149779871:+:6949	TCOF1	GEXP	5	149737202	149779871	N:MIRN:hsa-miR-423-5p:chr17:28444097:28444190:+:MIMAT0004748	hsa-miR-423-5p	MIRN	17	28444097	28444190	500000000	20.1	27.2	0.45	545
N:GEXP:TCOF1:chr5:149737202:149779871:+:6949	TCOF1	GEXP	5	149737202	149779871	N:MIRN:hsa-let-7e-5p:chr19:52196039:52196117:+:MIMAT0000066	hsa-let-7e-5p	MIRN	19	52196039	52196117	500000000	18.9	25.9	0.44	545
N:GEXP:TCOF1:chr5:149737202:149779871:+:6949	TCOF1	GEXP	5	149737202	149779871	N:MIRN:hsa-miR-140-3p:chr16:69966984:69967083:+:MIMAT0004597	hsa-miR-140-3p	MIRN	16	69966984	69967083	500000000	18	25	0.43	545
N:GEXP:TCOF1:chr5:149737202:149779871:+:6949	TCOF1	GEXP	5	149737202	149779871	B:SAMP:I(HumanMethylation450|methPlatform):::::beadchip	methPlatform HumanMethylation450	SAMP				500000000	18.3	24.8	0.44	560
N:GEXP:TCOF1:chr5:149737202:149779871:+:6949	TCOF1	GEXP	5	149737202	149779871	B:SAMP:I(C1,C3|COAD-TP_miRseq_CNMF_3):::::	COAD-TP_miRseq_CNMF_3 C1 vs C3	SAMP				500000000	17.6	24.1	0.58	318
N:GEXP:TCOF1:chr5:149737202:149779871:+:6949	TCOF1	GEXP	5	149737202	149779871	N:MIRN:hsa-miR-1304-5p:chr11:93466840:93466930:+:MIMAT0005892	hsa-miR-1304-5p	MIRN	11	93466840	93466930	500000000	16.4	23.4	0.42	545
N:GEXP:TCOF1:chr5:149737202:149779871:+:6949	TCOF1	GEXP	5	149737202	149779871	N:MIRN:hsa-let-7a-5p:chr11:122017230:122017301:+:MIMAT0000062	hsa-let-7a-5p	MIRN	11	122017230	122017301	500000000	16.2	23.3	0.41	545
N:GEXP:TCOF1:chr5:149737202:149779871:+:6949	TCOF1	GEXP	5	149737202	149779871	N:MIRN:hsa-miR-432-5p:chr14:101350820:101350913:+:MIMAT0002814	hsa-miR-432-5p	MIRN	14	101350820	101350913	500000000	16	23.1	0.41	545
N:GEXP:TCOF1:chr5:149737202:149779871:+:6949	TCOF1	GEXP	5	149737202	149779871	N:MIRN:hsa-miR-128:chr2:136422967:136423048:+:MIMAT0000424	hsa-miR-128	MIRN	2	136422967	136423048	500000000	15.6	22.6	0.41	545
N:GEXP:TCOF1:chr5:149737202:149779871:+:6949	TCOF1	GEXP	5	149737202	149779871	B:SAMP:I(C1|COAD-TP_miRseq_CNMF_3):::::	COAD-TP_miRseq_CNMF_3 C1	SAMP				500000000	12.2	18.8	0.46	379
N:GEXP:TCOF1:chr5:149737202:149779871:+:6949	TCOF1	GEXP	5	149737202	149779871	B:SAMP:I(C1,C2|COAD-TP_miRseq_CC_3):::::	COAD-TP_miRseq_CC_3 C1 vs C2	SAMP				500000000	7.7	14.2	0.5	244
N:GEXP:TCOF1:chr5:149737202:149779871:+:6949	TCOF1	GEXP	5	149737202	149779871	B:SAMP:I(C2,C5|COAD-TP_mRNAseq_CNMF_5):::::	COAD-TP_mRNAseq_CNMF_5 C2 vs C5	SAMP				500000000	4.2	10.8	0.46	217
N:GEXP:TCOF1:chr5:149737202:149779871:+:6949	TCOF1	GEXP	5	149737202	149779871	B:SAMP:I(C2,C3|COAD-TP_miRseq_CNMF_3):::::	COAD-TP_miRseq_CNMF_3 C2 vs C3	SAMP				500000000	3.9	10.4	0.44	227
N:GEXP:TCOF1:chr5:149737202:149779871:+:6949	TCOF1	GEXP	5	149737202	149779871	B:SAMP:I(C3,C5|COAD-TP_mRNAseq_CNMF_5):::::	COAD-TP_mRNAseq_CNMF_5 C3 vs C5	SAMP				500000000	1.9	8.5	0.45	177
N:GEXP:TCOF1:chr5:149737202:149779871:+:6949	TCOF1	GEXP	5	149737202	149779871	B:SAMP:I(C2,C5|READ-TP_miRseq_CNMF_5):::::	READ-TP_miRseq_CNMF_5 C2 vs C5	SAMP				500000000	0	5.5	0.49	92
N:GEXP:TCOF1:chr5:149737202:149779871:+:6949	TCOF1	GEXP	5	149737202	149779871	B:SAMP:I(C1,C3|READ-TP_mRNAseq_CC_3):::::	READ-TP_mRNAseq_CC_3 C1 vs C3	SAMP				500000000	0	5.4	0.42	119
N:GEXP:TCOF1:chr5:149737202:149779871:+:6949	TCOF1	GEXP	5	149737202	149779871	B:SAMP:I(C3,C4|READ-TP_mRNAseq_CNMF_4):::::	READ-TP_mRNAseq_CNMF_4 C3 vs C4	SAMP				500000000	0	4.4	0.43	92
N:GEXP:TCOF1:chr5:149737202:149779871:+:6949	TCOF1	GEXP	5	149737202	149779871	B:SAMP:I(C1|READ-TP_miRseq_Mature_CNMF_4):::::	READ-TP_miRseq_Mature_CNMF_4 C1	SAMP				500000000	0	3.5	0.43	71
N:GEXP:TCOF1:chr5:149737202:149779871:+:6949	TCOF1	GEXP	5	149737202	149779871	B:SAMP:I(C1,C2|READ-TP_miRseq_Mature_CNMF_4):::::	READ-TP_miRseq_Mature_CNMF_4 C1 vs C2	SAMP				500000000	0	3.5	0.63	33
N:GEXP:TCOF1:chr5:149737202:149779871:+:6949	TCOF1	GEXP	5	149737202	149779871	B:SAMP:I(C1,C2|READ-TP_mRNA_CNMF_3):::::	READ-TP_mRNA_CNMF_3 C1 vs C2	SAMP				500000000	0	2.8	0.48	43
N:GEXP:TCOF1:chr5:149737202:149779871:+:6949	TCOF1	GEXP	5	149737202	149779871	B:SAMP:I(C1,C3|READ-TP_miRseq_Mature_CNMF_4):::::	READ-TP_miRseq_Mature_CNMF_4 C1 vs C3	SAMP				500000000	0	2.5	0.52	32
N:GEXP:TCOF1:chr5:149737202:149779871:+:6949	TCOF1	GEXP	5	149737202	149779871	B:SAMP:I(C1,C4|READ-TP_miRseq_Mature_CNMF_4):::::	READ-TP_miRseq_Mature_CNMF_4 C1 vs C4	SAMP				500000000	0	2.2	0.51	30

## Sheet: ESCA+STAD
id_a	pretty_label_a	datatype_a	chr_a	start_a	end_a	id_b	pretty_label_b	datatype_b	chr_b	start_b	end_b	link_distance	adj_logged_pvalue	logged_pvalue	correlation	num_nonna
N:GEXP:PKMYT1:chr16:3022792:3030540:-:9088	PKMYT1	GEXP	16	3022792	3030540	N:GEXP:TCOF1:chr5:149737202:149779871:+:6949	TCOF1	GEXP	5	149737202	149779871	500000000	48	56.1	0.6	558
N:GEXP:CDT1:chr16:88870186:88875666:+:81620	CDT1	GEXP	16	88870186	88875666	N:GEXP:TCOF1:chr5:149737202:149779871:+:6949	TCOF1	GEXP	5	149737202	149779871	500000000	47.3	55.4	0.6	558
N:GEXP:KIF20A:chr5:137514417:137523404:+:10112	KIF20A	GEXP	5	137514417	137523404	N:GEXP:TCOF1:chr5:149737202:149779871:+:6949	TCOF1	GEXP	5	149737202	149779871	12213798	45.9	54	0.59	558
N:GEXP:CHAF1A:chr19:4402660:4443394:+:10036	CHAF1A	GEXP	19	4402660	4443394	N:GEXP:TCOF1:chr5:149737202:149779871:+:6949	TCOF1	GEXP	5	149737202	149779871	500000000	43.3	51.4	0.58	558
N:GEXP:PTTG1:chr5:159848865:159855746:+:9232	PTTG1	GEXP	5	159848865	159855746	N:GEXP:TCOF1:chr5:149737202:149779871:+:6949	TCOF1	GEXP	5	149737202	149779871	10068994	43.1	51.2	0.58	558
N:GEXP:AURKB:chr17:8108049:8113883:-:9212	AURKB	GEXP	17	8108049	8113883	N:GEXP:TCOF1:chr5:149737202:149779871:+:6949	TCOF1	GEXP	5	149737202	149779871	500000000	43	51.1	0.58	558
N:GEXP:CCNB1:chr5:68462837:68474070:+:891	CCNB1	GEXP	5	68462837	68474070	N:GEXP:TCOF1:chr5:149737202:149779871:+:6949	TCOF1	GEXP	5	149737202	149779871	81263132	42.8	50.9	0.58	558
N:GEXP:RECQL4:chr8:145736667:145743210:-:9401	RECQL4	GEXP	8	145736667	145743210	N:GEXP:TCOF1:chr5:149737202:149779871:+:6949	TCOF1	GEXP	5	149737202	149779871	500000000	42.4	50.5	0.58	558
N:GEXP:KIF22:chr16:29802058:29816706:+:3835	KIF22	GEXP	16	29802058	29816706	N:GEXP:TCOF1:chr5:149737202:149779871:+:6949	TCOF1	GEXP	5	149737202	149779871	500000000	42.3	50.4	0.58	558
N:GEXP:C16orf59:chr16:2510115:2514964:+:80178	C16orf59	GEXP	16	2510115	2514964	N:GEXP:TCOF1:chr5:149737202:149779871:+:6949	TCOF1	GEXP	5	149737202	149779871	500000000	41.2	49.3	0.57	558
N:GEXP:HMMR:chr5:162887517:162918953:+:3161	HMMR	GEXP	5	162887517	162918953	N:GEXP:TCOF1:chr5:149737202:149779871:+:6949	TCOF1	GEXP	5	149737202	149779871	13107646	39.3	47.4	0.56	558
N:GEXP:PPM1G:chr2:27604061:27632496:-:5496	PPM1G	GEXP	2	27604061	27632496	N:GEXP:TCOF1:chr5:149737202:149779871:+:6949	TCOF1	GEXP	5	149737202	149779871	500000000	39	47.1	0.56	558
N:GEXP:CDCA5:chr11:64844927:64851615:-:113130	CDCA5	GEXP	11	64844927	64851615	N:GEXP:TCOF1:chr5:149737202:149779871:+:6949	TCOF1	GEXP	5	149737202	149779871	500000000	38.8	46.9	0.56	558
N:GEXP:TCOF1:chr5:149737202:149779871:+:6949	TCOF1	GEXP	5	149737202	149779871	N:GEXP:TOMM40:chr19:45394477:45406946:+:10452	TOMM40	GEXP	19	45394477	45406946	500000000	38.5	46.6	0.56	558
N:GEXP:HNRNPM:chr19:8509803:8554002:+:4670	HNRNPM	GEXP	19	8509803	8554002	N:GEXP:TCOF1:chr5:149737202:149779871:+:6949	TCOF1	GEXP	5	149737202	149779871	500000000	37.9	46	0.56	558
N:GEXP:CENPN:chr16:81040103:81066709:+:55839	CENPN	GEXP	16	81040103	81066709	N:GEXP:TCOF1:chr5:149737202:149779871:+:6949	TCOF1	GEXP	5	149737202	149779871	500000000	37.8	45.9	0.56	558
N:GEXP:CENPH:chr5:68485375:68506184:+:64946	CENPH	GEXP	5	68485375	68506184	N:GEXP:TCOF1:chr5:149737202:149779871:+:6949	TCOF1	GEXP	5	149737202	149779871	81231018	37	45	0.55	558
N:GEXP:C17orf53:chr17:42219274:42239844:+:78995	C17orf53	GEXP	17	42219274	42239844	N:GEXP:TCOF1:chr5:149737202:149779871:+:6949	TCOF1	GEXP	5	149737202	149779871	500000000	37	45	0.55	558
N:GEXP:KIF18B:chr17:43002082:43025082:-:146909	KIF18B	GEXP	17	43002082	43025082	N:GEXP:TCOF1:chr5:149737202:149779871:+:6949	TCOF1	GEXP	5	149737202	149779871	500000000	36.5	44.6	0.55	558
N:GEXP:CDC20:chr1:43824626:43828873:+:991	CDC20	GEXP	1	43824626	43828873	N:GEXP:TCOF1:chr5:149737202:149779871:+:6949	TCOF1	GEXP	5	149737202	149779871	500000000	36.4	44.5	0.55	558
N:GEXP:TCOF1:chr5:149737202:149779871:+:6949	TCOF1	GEXP	5	149737202	149779871	N:GEXP:TFAP4:chr16:4307187:4323001:-:7023	TFAP4	GEXP	16	4307187	4323001	500000000	36.2	44.3	0.55	558
N:GEXP:TCOF1:chr5:149737202:149779871:+:6949	TCOF1	GEXP	5	149737202	149779871	N:GEXP:TROAP:chr12:49716971:49725514:+:10024	TROAP	GEXP	12	49716971	49725514	500000000	36.1	44.2	0.55	558
N:GEXP:CHTF18:chr16:838622:848074:+:63922	CHTF18	GEXP	16	838622	848074	N:GEXP:TCOF1:chr5:149737202:149779871:+:6949	TCOF1	GEXP	5	149737202	149779871	500000000	35.5	43.5	0.54	558
N:GEXP:G3BP1:chr5:151151476:151184915:+:10146	G3BP1	GEXP	5	151151476	151184915	N:GEXP:TCOF1:chr5:149737202:149779871:+:6949	TCOF1	GEXP	5	149737202	149779871	1371605	35.3	43.4	0.54	558
N:GEXP:RNASEH2A:chr19:12917428:12924462:+:10535	RNASEH2A	GEXP	19	12917428	12924462	N:GEXP:TCOF1:chr5:149737202:149779871:+:6949	TCOF1	GEXP	5	149737202	149779871	500000000	34.9	43	0.54	558
N:GEXP:RRS1:chr8:67341263:67342968:+:23212	RRS1	GEXP	8	67341263	67342968	N:GEXP:TCOF1:chr5:149737202:149779871:+:6949	TCOF1	GEXP	5	149737202	149779871	500000000	35	43	0.54	558
N:GEXP:BIRC5:chr17:76210277:76221716:+:332	BIRC5	GEXP	17	76210277	76221716	N:GEXP:TCOF1:chr5:149737202:149779871:+:6949	TCOF1	GEXP	5	149737202	149779871	500000000	34.5	42.5	0.54	558
N:GEXP:MRTO4:chr1:19578075:19586622:+:51154	MRTO4	GEXP	1	19578075	19586622	N:GEXP:TCOF1:chr5:149737202:149779871:+:6949	TCOF1	GEXP	5	149737202	149779871	500000000	34.2	42.2	0.54	558
N:GEXP:DAZAP1:chr19:1407584:1435682:+:26528	DAZAP1	GEXP	19	1407584	1435682	N:GEXP:TCOF1:chr5:149737202:149779871:+:6949	TCOF1	GEXP	5	149737202	149779871	500000000	33.8	41.9	0.53	558
N:GEXP:ORC6:chr16:46723558:46732306:+:23594	ORC6	GEXP	16	46723558	46732306	N:GEXP:TCOF1:chr5:149737202:149779871:+:6949	TCOF1	GEXP	5	149737202	149779871	500000000	33.7	41.8	0.53	558
N:GEXP:PUS1:chr12:132413745:132428406:+:80324	PUS1	GEXP	12	132413745	132428406	N:GEXP:TCOF1:chr5:149737202:149779871:+:6949	TCOF1	GEXP	5	149737202	149779871	500000000	33.7	41.8	0.53	558
N:GEXP:TACC3:chr4:1723217:1746905:+:10460	TACC3	GEXP	4	1723217	1746905	N:GEXP:TCOF1:chr5:149737202:149779871:+:6949	TCOF1	GEXP	5	149737202	149779871	500000000	33.5	41.6	0.53	558
N:GEXP:TCOF1:chr5:149737202:149779871:+:6949	TCOF1	GEXP	5	149737202	149779871	N:GEXP:TONSL:chr8:145654163:145669812:-:4796	TONSL	GEXP	8	145654163	145669812	500000000	33.4	41.5	0.53	558
N:GEXP:LMNB1:chr5:126112315:126172712:+:4001	LMNB1	GEXP	5	126112315	126172712	N:GEXP:TCOF1:chr5:149737202:149779871:+:6949	TCOF1	GEXP	5	149737202	149779871	23564490	33.4	41.5	0.53	558
N:GEXP:GINS1:chr20:25388323:25429191:+:9837	GINS1	GEXP	20	25388323	25429191	N:GEXP:TCOF1:chr5:149737202:149779871:+:6949	TCOF1	GEXP	5	149737202	149779871	500000000	33	41.1	0.53	558
N:GEXP:NUDT1:chr7:2281857:2290780:+:4521	NUDT1	GEXP	7	2281857	2290780	N:GEXP:TCOF1:chr5:149737202:149779871:+:6949	TCOF1	GEXP	5	149737202	149779871	500000000	32.9	41	0.53	558
N:GEXP:FEN1:chr11:61560109:61564714:+:2237	FEN1	GEXP	11	61560109	61564714	N:GEXP:TCOF1:chr5:149737202:149779871:+:6949	TCOF1	GEXP	5	149737202	149779871	500000000	32.8	40.9	0.53	558
N:GEXP:CCNF:chr16:2479395:2508859:+:899	CCNF	GEXP	16	2479395	2508859	N:GEXP:TCOF1:chr5:149737202:149779871:+:6949	TCOF1	GEXP	5	149737202	149779871	500000000	32.7	40.7	0.53	558
N:GEXP:POLD1:chr19:50887593:50921271:+:5424	POLD1	GEXP	19	50887593	50921271	N:GEXP:TCOF1:chr5:149737202:149779871:+:6949	TCOF1	GEXP	5	149737202	149779871	500000000	32.7	40.7	0.53	558
N:GEXP:CDC25C:chr5:137620959:137674044:-:995	CDC25C	GEXP	5	137620959	137674044	N:GEXP:TCOF1:chr5:149737202:149779871:+:6949	TCOF1	GEXP	5	149737202	149779871	12063158	32.3	40.4	0.53	558
N:GEXP:TCOF1:chr5:149737202:149779871:+:6949	TCOF1	GEXP	5	149737202	149779871	N:GEXP:TPX2:chr20:30326904:30389603:+:22974	TPX2	GEXP	20	30326904	30389603	500000000	32	40.1	0.52	558
N:GEXP:MCM10:chr10:13203554:13253104:+:55388	MCM10	GEXP	10	13203554	13253104	N:GEXP:TCOF1:chr5:149737202:149779871:+:6949	TCOF1	GEXP	5	149737202	149779871	500000000	32	40.1	0.52	558
N:GEXP:SFPQ:chr1:35649201:35658743:-:6421	SFPQ	GEXP	1	35649201	35658743	N:GEXP:TCOF1:chr5:149737202:149779871:+:6949	TCOF1	GEXP	5	149737202	149779871	500000000	31.7	39.7	0.52	558
N:GEXP:TCOF1:chr5:149737202:149779871:+:6949	TCOF1	GEXP	5	149737202	149779871	N:GEXP:UHRF1:chr19:4909510:4962165:+:29128	UHRF1	GEXP	19	4909510	4962165	500000000	31.4	39.5	0.52	558
N:GEXP:TCOF1:chr5:149737202:149779871:+:6949	TCOF1	GEXP	5	149737202	149779871	N:GEXP:VRK1:chr14:97263684:97347951:+:7443	VRK1	GEXP	14	97263684	97347951	500000000	31.3	39.4	0.52	558
N:GEXP:CENPA:chr2:27008882:27023934:+:1058	CENPA	GEXP	2	27008882	27023934	N:GEXP:TCOF1:chr5:149737202:149779871:+:6949	TCOF1	GEXP	5	149737202	149779871	500000000	31.2	39.3	0.52	558
N:GEXP:PA2G4:chr12:56498103:56507694:+:5036	PA2G4	GEXP	12	56498103	56507694	N:GEXP:TCOF1:chr5:149737202:149779871:+:6949	TCOF1	GEXP	5	149737202	149779871	500000000	31.2	39.3	0.52	558
N:GEXP:CCDC86:chr11:60609429:60618561:+:79080	CCDC86	GEXP	11	60609429	60618561	N:GEXP:TCOF1:chr5:149737202:149779871:+:6949	TCOF1	GEXP	5	149737202	149779871	500000000	31.3	39.3	0.52	558
N:GEXP:CLSPN:chr1:36197713:36235551:-:63967	CLSPN	GEXP	1	36197713	36235551	N:GEXP:TCOF1:chr5:149737202:149779871:+:6949	TCOF1	GEXP	5	149737202	149779871	500000000	31.1	39.2	0.52	558
N:GEXP:LMNB2:chr19:2428164:2456958:-:84823	LMNB2	GEXP	19	2428164	2456958	N:GEXP:TCOF1:chr5:149737202:149779871:+:6949	TCOF1	GEXP	5	149737202	149779871	500000000	31.1	39.2	0.52	558
N:GEXP:C1orf135:chr1:26160497:26185848:-:79000	C1orf135	GEXP	1	26160497	26185848	N:GEXP:TCOF1:chr5:149737202:149779871:+:6949	TCOF1	GEXP	5	149737202	149779871	500000000	31	39.1	0.52	558
N:GEXP:CCT7:chr2:73461364:73480150:+:10574	CCT7	GEXP	2	73461364	73480150	N:GEXP:TCOF1:chr5:149737202:149779871:+:6949	TCOF1	GEXP	5	149737202	149779871	500000000	30.9	39	0.52	558
N:GEXP:SPAG5:chr17:26904583:26941211:-:10615	SPAG5	GEXP	17	26904583	26941211	N:GEXP:TCOF1:chr5:149737202:149779871:+:6949	TCOF1	GEXP	5	149737202	149779871	500000000	30.9	38.9	0.52	558
N:GEXP:MYBL2:chr20:42295709:42345122:+:4605	MYBL2	GEXP	20	42295709	42345122	N:GEXP:TCOF1:chr5:149737202:149779871:+:6949	TCOF1	GEXP	5	149737202	149779871	500000000	30.5	38.6	0.52	558
N:GEXP:SRRT:chr7:100472701:100486285:+:51593	SRRT	GEXP	7	100472701	100486285	N:GEXP:TCOF1:chr5:149737202:149779871:+:6949	TCOF1	GEXP	5	149737202	149779871	500000000	30.3	38.4	0.51	558
N:GEXP:LYAR:chr4:4269429:4291896:-:55646	LYAR	GEXP	4	4269429	4291896	N:GEXP:TCOF1:chr5:149737202:149779871:+:6949	TCOF1	GEXP	5	149737202	149779871	500000000	30.3	38.4	0.52	558
N:GEXP:NCL:chr2:232319459:232329205:-:4691	NCL	GEXP	2	232319459	232329205	N:GEXP:TCOF1:chr5:149737202:149779871:+:6949	TCOF1	GEXP	5	149737202	149779871	500000000	30.2	38.3	0.51	558
N:GEXP:PLK1:chr16:23690201:23701688:+:5347	PLK1	GEXP	16	23690201	23701688	N:GEXP:TCOF1:chr5:149737202:149779871:+:6949	TCOF1	GEXP	5	149737202	149779871	500000000	30.1	38.2	0.51	558
N:GEXP:HNRNPAB:chr5:177631508:177638184:+:3182	HNRNPAB	GEXP	5	177631508	177638184	N:GEXP:TCOF1:chr5:149737202:149779871:+:6949	TCOF1	GEXP	5	149737202	149779871	27851637	30	38.1	0.51	558
N:GEXP:GSG2:chr17:3627197:3629992:+:83903	GSG2	GEXP	17	3627197	3629992	N:GEXP:TCOF1:chr5:149737202:149779871:+:6949	TCOF1	GEXP	5	149737202	149779871	500000000	30	38.1	0.51	558
N:GEXP:HAUS7:chrX:152710178:152760978:-:55559	HAUS7	GEXP	X	152710178	152760978	N:GEXP:TCOF1:chr5:149737202:149779871:+:6949	TCOF1	GEXP	5	149737202	149779871	500000000	29.8	37.9	0.51	558
N:GEXP:CDCA3:chr12:6953963:6960456:-:83461	CDCA3	GEXP	12	6953963	6960456	N:GEXP:TCOF1:chr5:149737202:149779871:+:6949	TCOF1	GEXP	5	149737202	149779871	500000000	29.6	37.7	0.51	558
N:GEXP:RCC1:chr1:28832455:28865708:+:1104	RCC1	GEXP	1	28832455	28865708	N:GEXP:TCOF1:chr5:149737202:149779871:+:6949	TCOF1	GEXP	5	149737202	149779871	500000000	29.3	37.4	0.51	558
N:GEXP:FUS:chr16:31191431:31206192:+:2521	FUS	GEXP	16	31191431	31206192	N:GEXP:TCOF1:chr5:149737202:149779871:+:6949	TCOF1	GEXP	5	149737202	149779871	500000000	29.3	37.3	0.51	558
N:GEXP:SUV39H1:chrX:48553945:48567406:+:6839	SUV39H1	GEXP	X	48553945	48567406	N:GEXP:TCOF1:chr5:149737202:149779871:+:6949	TCOF1	GEXP	5	149737202	149779871	500000000	29.2	37.3	0.51	558
N:GEXP:TCOF1:chr5:149737202:149779871:+:6949	TCOF1	GEXP	5	149737202	149779871	N:GEXP:UBE2S:chr19:55912650:55919325:-:27338	UBE2S	GEXP	19	55912650	55919325	500000000	29	37.1	0.51	558
N:GEXP:KIFC1:chr6:33359313:33377699:+:3833	KIFC1	GEXP	6	33359313	33377699	N:GEXP:TCOF1:chr5:149737202:149779871:+:6949	TCOF1	GEXP	5	149737202	149779871	500000000	29	37.1	0.51	558
N:GEXP:RAD54L:chr1:46713367:46744145:+:8438	RAD54L	GEXP	1	46713367	46744145	N:GEXP:TCOF1:chr5:149737202:149779871:+:6949	TCOF1	GEXP	5	149737202	149779871	500000000	28.9	37	0.51	558
N:GEXP:NOP2:chr12:6666037:6677480:-:4839	NOP2	GEXP	12	6666037	6677480	N:GEXP:TCOF1:chr5:149737202:149779871:+:6949	TCOF1	GEXP	5	149737202	149779871	500000000	29	37	0.51	558
N:GEXP:DKC1:chrX:153991031:154005964:+:1736	DKC1	GEXP	X	153991031	154005964	N:GEXP:TCOF1:chr5:149737202:149779871:+:6949	TCOF1	GEXP	5	149737202	149779871	500000000	28.8	36.9	0.51	558
N:GEXP:LAS1L:chrX:64732462:64754686:-:81887	LAS1L	GEXP	X	64732462	64754686	N:GEXP:TCOF1:chr5:149737202:149779871:+:6949	TCOF1	GEXP	5	149737202	149779871	500000000	28.7	36.8	0.51	558
N:GEXP:CDCA4:chr14:105475910:105487425:-:55038	CDCA4	GEXP	14	105475910	105487425	N:GEXP:TCOF1:chr5:149737202:149779871:+:6949	TCOF1	GEXP	5	149737202	149779871	500000000	28.6	36.7	0.5	558
N:GEXP:TCOF1:chr5:149737202:149779871:+:6949	TCOF1	GEXP	5	149737202	149779871	N:MIRN:hsa-miR-18a-5p:chr13:92003005:92003075:+:MIMAT0000072	hsa-miR-18a-5p	MIRN	13	92003005	92003075	500000000	20.8	27.9	0.45	556
N:GEXP:TCOF1:chr5:149737202:149779871:+:6949	TCOF1	GEXP	5	149737202	149779871	N:MIRN:hsa-miR-1180:chr17:19247819:19247887:+:MIMAT0005825	hsa-miR-1180	MIRN	17	19247819	19247887	500000000	18.6	25.6	0.43	556
N:GEXP:TCOF1:chr5:149737202:149779871:+:6949	TCOF1	GEXP	5	149737202	149779871	N:MIRN:hsa-miR-17-5p:chr13:92002859:92002942:+:MIMAT0000070	hsa-miR-17-5p	MIRN	13	92002859	92002942	500000000	16.9	24	0.42	556
N:GEXP:TCOF1:chr5:149737202:149779871:+:6949	TCOF1	GEXP	5	149737202	149779871	N:MIRN:hsa-miR-18a-3p:chr13:92003005:92003075:+:MIMAT0002891	hsa-miR-18a-3p	MIRN	13	92003005	92003075	500000000	14.7	21.7	0.4	556

## Sheet: GBM
id_a	pretty_label_a	datatype_a	chr_a	start_a	end_a	id_b	pretty_label_b	datatype_b	chr_b	start_b	end_b	link_distance	adj_logged_pvalue	logged_pvalue	correlation	num_nonna
N:GEXP:PPRC1:chr10:103892787:103910090:+:	PPRC1	GEXP	10	103892787	103910090	N:GEXP:TCOF1:chr5:149737202:149779871:+:	TCOF1	GEXP	5	149737202	149779871	500000000	63.9	71.8	0.679	528
N:GEXP:LMNB2:chr19:2428164:2456958:-:	LMNB2	GEXP	19	2428164	2456958	N:GEXP:TCOF1:chr5:149737202:149779871:+:	TCOF1	GEXP	5	149737202	149779871	500000000	57.3	65.1	0.654	528
N:GEXP:KDM2A:chr11:66886740:67025550:+:	KDM2A	GEXP	11	66886740	67025550	N:GEXP:TCOF1:chr5:149737202:149779871:+:	TCOF1	GEXP	5	149737202	149779871	500000000	55.3	63.2	0.647	528
N:GEXP:RBM10:chrX:47004617:47046214:+:	RBM10	GEXP	X	47004617	47046214	N:GEXP:TCOF1:chr5:149737202:149779871:+:	TCOF1	GEXP	5	149737202	149779871	500000000	55.2	63.1	0.646	528
N:GEXP:SART1:chr11:65729160:65747607:+:	SART1	GEXP	11	65729160	65747607	N:GEXP:TCOF1:chr5:149737202:149779871:+:	TCOF1	GEXP	5	149737202	149779871	500000000	52.5	60.4	0.636	528
N:GEXP:ACIN1:chr14:23527774:23564823:-:	ACIN1	GEXP	14	23527774	23564823	N:GEXP:TCOF1:chr5:149737202:149779871:+:	TCOF1	GEXP	5	149737202	149779871	500000000	51.9	59.7	0.633	528
N:GEXP:SAFB:chr19:5623046:5668489:+:	SAFB	GEXP	19	5623046	5668489	N:GEXP:TCOF1:chr5:149737202:149779871:+:	TCOF1	GEXP	5	149737202	149779871	500000000	51.9	59.7	0.633	528
N:GEXP:RRP1:chr21:45209418:45223983:+:	RRP1	GEXP	21	45209418	45223983	N:GEXP:TCOF1:chr5:149737202:149779871:+:	TCOF1	GEXP	5	149737202	149779871	500000000	51.3	59.1	0.63	528
N:GEXP:FOXK2:chr17:80477594:80562483:+:	FOXK2	GEXP	17	80477594	80562483	N:GEXP:TCOF1:chr5:149737202:149779871:+:	TCOF1	GEXP	5	149737202	149779871	500000000	51	58.9	0.629	528
N:GEXP:KPNB1:chr17:45727275:45761004:+:	KPNB1	GEXP	17	45727275	45761004	N:GEXP:TCOF1:chr5:149737202:149779871:+:	TCOF1	GEXP	5	149737202	149779871	500000000	50.3	58.2	0.626	528
N:GEXP:TCOF1:chr5:149737202:149779871:+:	TCOF1	GEXP	5	149737202	149779871	N:GEXP:TNPO3:chr7:128594234:128695227:-:	TNPO3	GEXP	7	128594234	128695227	500000000	49.3	57.2	0.622	528
N:GEXP:EP400:chr12:132434465:132565011:+:	EP400	GEXP	12	132434465	132565011	N:GEXP:TCOF1:chr5:149737202:149779871:+:	TCOF1	GEXP	5	149737202	149779871	500000000	47.4	55.3	0.614	528
N:GEXP:SFSWAP:chr12:132195635:132284282:+:	SFSWAP	GEXP	12	132195635	132284282	N:GEXP:TCOF1:chr5:149737202:149779871:+:	TCOF1	GEXP	5	149737202	149779871	500000000	47.1	54.9	0.612	528
N:GEXP:PABPN1:chr14:23789396:23795394:+:	PABPN1	GEXP	14	23789396	23795394	N:GEXP:TCOF1:chr5:149737202:149779871:+:	TCOF1	GEXP	5	149737202	149779871	500000000	46.7	54.6	0.611	528
N:GEXP:AATF:chr17:35306175:35414171:+:	AATF	GEXP	17	35306175	35414171	N:GEXP:TCOF1:chr5:149737202:149779871:+:	TCOF1	GEXP	5	149737202	149779871	500000000	46.1	53.9	0.608	528
N:GEXP:BMS1:chr10:43277954:43330385:+:	BMS1	GEXP	10	43277954	43330385	N:GEXP:TCOF1:chr5:149737202:149779871:+:	TCOF1	GEXP	5	149737202	149779871	500000000	45.6	53.5	0.606	528
N:GEXP:MED12:chrX:70338406:70362304:+:	MED12	GEXP	X	70338406	70362304	N:GEXP:TCOF1:chr5:149737202:149779871:+:	TCOF1	GEXP	5	149737202	149779871	500000000	45	52.9	0.603	528
N:GEXP:DAZAP1:chr19:1407584:1435682:+:	DAZAP1	GEXP	19	1407584	1435682	N:GEXP:TCOF1:chr5:149737202:149779871:+:	TCOF1	GEXP	5	149737202	149779871	500000000	45	52.8	0.603	528
N:GEXP:EIF3A:chr10:120794541:120840334:-:	EIF3A	GEXP	10	120794541	120840334	N:GEXP:TCOF1:chr5:149737202:149779871:+:	TCOF1	GEXP	5	149737202	149779871	500000000	44.9	52.8	0.603	528
N:GEXP:SMARCC1:chr3:47627378:47823596:-:	SMARCC1	GEXP	3	47627378	47823596	N:GEXP:TCOF1:chr5:149737202:149779871:+:	TCOF1	GEXP	5	149737202	149779871	500000000	44.9	52.8	0.603	528
N:GEXP:TCOF1:chr5:149737202:149779871:+:	TCOF1	GEXP	5	149737202	149779871	N:GEXP:VARS:chr6:31745297:31763712:-:	VARS	GEXP	6	31745297	31763712	500000000	44.7	52.6	0.602	528
N:GEXP:PDCD11:chr10:105156412:105206019:+:	PDCD11	GEXP	10	105156412	105206019	N:GEXP:TCOF1:chr5:149737202:149779871:+:	TCOF1	GEXP	5	149737202	149779871	500000000	44.7	52.6	0.602	528
N:GEXP:HCFC1:chrX:153213008:153236819:-:	HCFC1	GEXP	X	153213008	153236819	N:GEXP:TCOF1:chr5:149737202:149779871:+:	TCOF1	GEXP	5	149737202	149779871	500000000	44.8	52.6	0.602	528
N:GEXP:RBM15B:chr3:51428699:51435336:+:	RBM15B	GEXP	3	51428699	51435336	N:GEXP:TCOF1:chr5:149737202:149779871:+:	TCOF1	GEXP	5	149737202	149779871	500000000	44.4	52.3	0.6	528
N:GEXP:EDC4:chr16:67906926:67920270:+:	EDC4	GEXP	16	67906926	67920270	N:GEXP:TCOF1:chr5:149737202:149779871:+:	TCOF1	GEXP	5	149737202	149779871	500000000	44.5	52.3	0.601	528
N:GEXP:TCOF1:chr5:149737202:149779871:+:	TCOF1	GEXP	5	149737202	149779871	N:GEXP:UBE2O:chr17:74385613:74449288:-:	UBE2O	GEXP	17	74385613	74449288	500000000	44.4	52.2	0.6	528
N:GEXP:TCOF1:chr5:149737202:149779871:+:	TCOF1	GEXP	5	149737202	149779871	N:GEXP:UBTF:chr17:42282401:42298994:-:	UBTF	GEXP	17	42282401	42298994	500000000	43.8	51.7	0.598	528
N:GEXP:EIF3B:chr7:2394474:2420377:+:	EIF3B	GEXP	7	2394474	2420377	N:GEXP:TCOF1:chr5:149737202:149779871:+:	TCOF1	GEXP	5	149737202	149779871	500000000	43.5	51.4	0.596	528
N:GEXP:MSL2:chr3:135867760:135914688:-:	MSL2	GEXP	3	135867760	135914688	N:GEXP:TCOF1:chr5:149737202:149779871:+:	TCOF1	GEXP	5	149737202	149779871	500000000	43.4	51.3	0.596	528
N:GEXP:SMPD4:chr2:130908965:130940323:-:	SMPD4	GEXP	2	130908965	130940323	N:GEXP:TCOF1:chr5:149737202:149779871:+:	TCOF1	GEXP	5	149737202	149779871	500000000	43.1	50.9	0.594	528
N:GEXP:NIPBL:chr5:36876861:37065921:+:	NIPBL	GEXP	5	36876861	37065921	N:GEXP:TCOF1:chr5:149737202:149779871:+:	TCOF1	GEXP	5	149737202	149779871	112671281	42.6	50.5	0.592	528
N:GEXP:CCP110:chr16:19535179:19564728:+:	CCP110	GEXP	16	19535179	19564728	N:GEXP:TCOF1:chr5:149737202:149779871:+:	TCOF1	GEXP	5	149737202	149779871	500000000	42.6	50.5	0.592	528
N:GEXP:CIZ1:chr9:130928344:130966662:-:	CIZ1	GEXP	9	130928344	130966662	N:GEXP:TCOF1:chr5:149737202:149779871:+:	TCOF1	GEXP	5	149737202	149779871	500000000	42.5	50.4	0.591	528
N:GEXP:NCAPD2:chr12:6603298:6641132:+:	NCAPD2	GEXP	12	6603298	6641132	N:GEXP:TCOF1:chr5:149737202:149779871:+:	TCOF1	GEXP	5	149737202	149779871	500000000	42	49.9	0.589	528
N:GEXP:PRRC2C:chr1:171454666:171562650:+:	PRRC2C	GEXP	1	171454666	171562650	N:GEXP:TCOF1:chr5:149737202:149779871:+:	TCOF1	GEXP	5	149737202	149779871	500000000	42	49.9	0.589	528
N:GEXP:PPM1G:chr2:27604061:27632496:-:	PPM1G	GEXP	2	27604061	27632496	N:GEXP:TCOF1:chr5:149737202:149779871:+:	TCOF1	GEXP	5	149737202	149779871	500000000	42	49.9	0.589	528
N:GEXP:LARP1:chr5:154092462:154197163:+:	LARP1	GEXP	5	154092462	154197163	N:GEXP:TCOF1:chr5:149737202:149779871:+:	TCOF1	GEXP	5	149737202	149779871	4312591	42	49.9	0.589	528
N:GEXP:RPAP1:chr15:41809375:41836464:-:	RPAP1	GEXP	15	41809375	41836464	N:GEXP:TCOF1:chr5:149737202:149779871:+:	TCOF1	GEXP	5	149737202	149779871	500000000	42	49.8	0.589	528
N:GEXP:PRRC2B:chr9:134269600:134375578:+:	PRRC2B	GEXP	9	134269600	134375578	N:GEXP:TCOF1:chr5:149737202:149779871:+:	TCOF1	GEXP	5	149737202	149779871	500000000	41.9	49.7	0.588	528
N:GEXP:MLXIP:chr12:122516652:122628967:+:	MLXIP	GEXP	12	122516652	122628967	N:GEXP:TCOF1:chr5:149737202:149779871:+:	TCOF1	GEXP	5	149737202	149779871	500000000	41.6	49.5	0.587	528
N:GEXP:TCOF1:chr5:149737202:149779871:+:	TCOF1	GEXP	5	149737202	149779871	N:GEXP:TTF1:chr9:135250937:135282238:-:	TTF1	GEXP	9	135250937	135282238	500000000	41.5	49.4	0.587	528
N:GEXP:HNRNPM:chr19:8509803:8554002:+:	HNRNPM	GEXP	19	8509803	8554002	N:GEXP:TCOF1:chr5:149737202:149779871:+:	TCOF1	GEXP	5	149737202	149779871	500000000	41.4	49.2	0.586	528
N:GEXP:RRP1B:chr21:45079432:45115960:+:	RRP1B	GEXP	21	45079432	45115960	N:GEXP:TCOF1:chr5:149737202:149779871:+:	TCOF1	GEXP	5	149737202	149779871	500000000	41.4	49.2	0.586	528
N:GEXP:GOLGA3:chr12:133345495:133405426:-:	GOLGA3	GEXP	12	133345495	133405426	N:GEXP:TCOF1:chr5:149737202:149779871:+:	TCOF1	GEXP	5	149737202	149779871	500000000	41.2	49.1	0.585	528
N:GEXP:CCNJ:chr10:97803159:97820625:+:	CCNJ	GEXP	10	97803159	97820625	N:GEXP:TCOF1:chr5:149737202:149779871:+:	TCOF1	GEXP	5	149737202	149779871	500000000	41.3	49.1	0.585	528
N:GEXP:TCOF1:chr5:149737202:149779871:+:	TCOF1	GEXP	5	149737202	149779871	N:GEXP:WHSC1:chr4:1873123:1983934:+:	WHSC1	GEXP	4	1873123	1983934	500000000	40.9	48.8	0.584	528
N:GEXP:TCOF1:chr5:149737202:149779871:+:	TCOF1	GEXP	5	149737202	149779871	N:GEXP:UBE4B:chr1:10093041:10241296:+:	UBE4B	GEXP	1	10093041	10241296	500000000	41	48.8	0.584	528
N:GEXP:HGS:chr17:79650962:79669151:+:	HGS	GEXP	17	79650962	79669151	N:GEXP:TCOF1:chr5:149737202:149779871:+:	TCOF1	GEXP	5	149737202	149779871	500000000	40.8	48.7	0.583	528
N:GEXP:SSRP1:chr11:57093459:57103351:-:	SSRP1	GEXP	11	57093459	57103351	N:GEXP:TCOF1:chr5:149737202:149779871:+:	TCOF1	GEXP	5	149737202	149779871	500000000	40.7	48.5	0.582	528
N:GEXP:SRRM1:chr1:24969594:24999772:+:	SRRM1	GEXP	1	24969594	24999772	N:GEXP:TCOF1:chr5:149737202:149779871:+:	TCOF1	GEXP	5	149737202	149779871	500000000	40.6	48.5	0.582	528
N:GEXP:LAS1L:chrX:64732462:64754686:-:	LAS1L	GEXP	X	64732462	64754686	N:GEXP:TCOF1:chr5:149737202:149779871:+:	TCOF1	GEXP	5	149737202	149779871	500000000	40.5	48.4	0.582	528
N:GEXP:ANKLE2:chr12:133302254:133338451:-:	ANKLE2	GEXP	12	133302254	133338451	N:GEXP:TCOF1:chr5:149737202:149779871:+:	TCOF1	GEXP	5	149737202	149779871	500000000	40.5	48.4	0.582	528
N:GEXP:NCL:chr2:232319459:232329205:-:	NCL	GEXP	2	232319459	232329205	N:GEXP:TCOF1:chr5:149737202:149779871:+:	TCOF1	GEXP	5	149737202	149779871	500000000	40.4	48.2	0.581	528
N:GEXP:TCOF1:chr5:149737202:149779871:+:	TCOF1	GEXP	5	149737202	149779871	N:GEXP:ZNF282:chr7:148892577:148923339:+:	ZNF282	GEXP	7	148892577	148923339	500000000	40	47.8	0.579	528
N:GEXP:SUPT6H:chr17:26989302:27029249:+:	SUPT6H	GEXP	17	26989302	27029249	N:GEXP:TCOF1:chr5:149737202:149779871:+:	TCOF1	GEXP	5	149737202	149779871	500000000	40	47.8	0.579	528
N:GEXP:CAD:chr2:27440258:27466654:+:	CAD	GEXP	2	27440258	27466654	N:GEXP:TCOF1:chr5:149737202:149779871:+:	TCOF1	GEXP	5	149737202	149779871	500000000	39.9	47.8	0.579	528
N:GEXP:DHX16:chr6:30620896:30640830:-:	DHX16	GEXP	6	30620896	30640830	N:GEXP:TCOF1:chr5:149737202:149779871:+:	TCOF1	GEXP	5	149737202	149779871	500000000	39.3	47.1	0.575	528
N:GEXP:KPNA6:chr1:32573644:32642168:+:	KPNA6	GEXP	1	32573644	32642168	N:GEXP:TCOF1:chr5:149737202:149779871:+:	TCOF1	GEXP	5	149737202	149779871	500000000	39.1	47	0.575	528
N:GEXP:DNAJC7:chr17:40128439:40169715:-:	DNAJC7	GEXP	17	40128439	40169715	N:GEXP:TCOF1:chr5:149737202:149779871:+:	TCOF1	GEXP	5	149737202	149779871	500000000	39	46.9	0.574	528
N:GEXP:CPSF1:chr8:145618446:145634733:-:	CPSF1	GEXP	8	145618446	145634733	N:GEXP:TCOF1:chr5:149737202:149779871:+:	TCOF1	GEXP	5	149737202	149779871	500000000	38.9	46.7	0.573	528
N:GEXP:SMURF1:chr7:98625058:98741743:-:	SMURF1	GEXP	7	98625058	98741743	N:GEXP:TCOF1:chr5:149737202:149779871:+:	TCOF1	GEXP	5	149737202	149779871	500000000	38.7	46.6	0.572	528
N:GEXP:TCOF1:chr5:149737202:149779871:+:	TCOF1	GEXP	5	149737202	149779871	N:GEXP:UBAP2L:chr1:154192655:154243986:+:	UBAP2L	GEXP	1	154192655	154243986	500000000	38.6	46.5	0.572	528
N:GEXP:AKAP8L:chr19:15490859:15529833:-:	AKAP8L	GEXP	19	15490859	15529833	N:GEXP:TCOF1:chr5:149737202:149779871:+:	TCOF1	GEXP	5	149737202	149779871	500000000	38.6	46.5	0.572	528
N:GEXP:RFWD3:chr16:74655297:74700779:-:	RFWD3	GEXP	16	74655297	74700779	N:GEXP:TCOF1:chr5:149737202:149779871:+:	TCOF1	GEXP	5	149737202	149779871	500000000	38.6	46.4	0.572	528
N:GEXP:CDR2L:chr17:72983727:73001892:+:	CDR2L	GEXP	17	72983727	73001892	N:GEXP:TCOF1:chr5:149737202:149779871:+:	TCOF1	GEXP	5	149737202	149779871	500000000	38.4	46.3	0.571	528
N:GEXP:NUP62:chr19:50410084:50432988:-:	NUP62	GEXP	19	50410084	50432988	N:GEXP:TCOF1:chr5:149737202:149779871:+:	TCOF1	GEXP	5	149737202	149779871	500000000	38.2	46	0.57	528
N:GEXP:BRD9:chr5:863850:892939:-:	BRD9	GEXP	5	863850	892939	N:GEXP:TCOF1:chr5:149737202:149779871:+:	TCOF1	GEXP	5	149737202	149779871	148844263	38	45.9	0.569	528
N:GEXP:NOP2:chr12:6666037:6677480:-:	NOP2	GEXP	12	6666037	6677480	N:GEXP:TCOF1:chr5:149737202:149779871:+:	TCOF1	GEXP	5	149737202	149779871	500000000	37.7	45.6	0.567	528
N:GEXP:HELZ:chr17:65066554:65241319:-:	HELZ	GEXP	17	65066554	65241319	N:GEXP:TCOF1:chr5:149737202:149779871:+:	TCOF1	GEXP	5	149737202	149779871	500000000	37.7	45.6	0.567	528
N:GEXP:TCOF1:chr5:149737202:149779871:+:	TCOF1	GEXP	5	149737202	149779871	N:GEXP:TXLNA:chr1:32645345:32663886:+:	TXLNA	GEXP	1	32645345	32663886	500000000	37.6	45.4	0.567	528
N:GEXP:PCSK7:chr11:117075788:117102811:-:	PCSK7	GEXP	11	117075788	117102811	N:GEXP:TCOF1:chr5:149737202:149779871:+:	TCOF1	GEXP	5	149737202	149779871	500000000	37.4	45.3	0.566	528
N:GEXP:RAD54L2:chr3:51575596:51697612:+:	RAD54L2	GEXP	3	51575596	51697612	N:GEXP:TCOF1:chr5:149737202:149779871:+:	TCOF1	GEXP	5	149737202	149779871	500000000	37.4	45.3	0.566	528
N:GEXP:HNRNPAB:chr5:177631508:177638184:+:	HNRNPAB	GEXP	5	177631508	177638184	N:GEXP:TCOF1:chr5:149737202:149779871:+:	TCOF1	GEXP	5	149737202	149779871	27851637	37.4	45.3	0.566	528
N:GEXP:TCOF1:chr5:149737202:149779871:+:	TCOF1	GEXP	5	149737202	149779871	N:GEXP:USP13:chr3:179370933:179507189:+:	USP13	GEXP	3	179370933	179507189	500000000	37.3	45.1	0.565	528
N:GEXP:HIF1AN:chr10:102295641:102313681:+:	HIF1AN	GEXP	10	102295641	102313681	N:GEXP:TCOF1:chr5:149737202:149779871:+:	TCOF1	GEXP	5	149737202	149779871	500000000	37.3	45.1	0.565	528
N:GEXP:BAZ1B:chr7:72854728:72936615:-:	BAZ1B	GEXP	7	72854728	72936615	N:GEXP:TCOF1:chr5:149737202:149779871:+:	TCOF1	GEXP	5	149737202	149779871	500000000	37.2	45.1	0.565	528
N:GEXP:MARK2:chr11:63606400:63678492:+:	MARK2	GEXP	11	63606400	63678492	N:GEXP:TCOF1:chr5:149737202:149779871:+:	TCOF1	GEXP	5	149737202	149779871	500000000	37.1	45	0.564	528
N:GEXP:MAML1:chr5:179159851:179223512:+:	MAML1	GEXP	5	179159851	179223512	N:GEXP:TCOF1:chr5:149737202:149779871:+:	TCOF1	GEXP	5	149737202	149779871	29379980	36.9	44.8	0.563	528
N:GEXP:ODF2:chr9:131217434:131263571:+:	ODF2	GEXP	9	131217434	131263571	N:GEXP:TCOF1:chr5:149737202:149779871:+:	TCOF1	GEXP	5	149737202	149779871	500000000	36.6	44.4	0.561	528
N:GEXP:LMNB1:chr5:126112315:126172712:+:	LMNB1	GEXP	5	126112315	126172712	N:GEXP:TCOF1:chr5:149737202:149779871:+:	TCOF1	GEXP	5	149737202	149779871	23564490	36.5	44.4	0.561	528
N:GEXP:TCOF1:chr5:149737202:149779871:+:	TCOF1	GEXP	5	149737202	149779871	N:GEXP:UPF2:chr10:11962021:12085169:-:	UPF2	GEXP	10	11962021	12085169	500000000	36.5	44.3	0.561	528
N:GEXP:TCOF1:chr5:149737202:149779871:+:	TCOF1	GEXP	5	149737202	149779871	N:GEXP:UBN1:chr16:4896666:4932363:+:	UBN1	GEXP	16	4896666	4932363	500000000	36.5	44.3	0.561	528
N:GEXP:NFATC3:chr16:68118654:68263162:+:	NFATC3	GEXP	16	68118654	68263162	N:GEXP:TCOF1:chr5:149737202:149779871:+:	TCOF1	GEXP	5	149737202	149779871	500000000	36.5	44.3	0.561	528
N:GEXP:FAM50A:chrX:153672473:153679002:+:	FAM50A	GEXP	X	153672473	153679002	N:GEXP:TCOF1:chr5:149737202:149779871:+:	TCOF1	GEXP	5	149737202	149779871	500000000	36.5	44.3	0.561	528
N:GEXP:EIF5B:chr2:99953834:100016728:+:	EIF5B	GEXP	2	99953834	100016728	N:GEXP:TCOF1:chr5:149737202:149779871:+:	TCOF1	GEXP	5	149737202	149779871	500000000	36.2	44.1	0.559	528
N:GEXP:PELP1:chr17:4574679:4607632:-:	PELP1	GEXP	17	4574679	4607632	N:GEXP:TCOF1:chr5:149737202:149779871:+:	TCOF1	GEXP	5	149737202	149779871	500000000	36.1	44	0.559	528
N:GEXP:DHX38:chr16:72127615:72146811:+:	DHX38	GEXP	16	72127615	72146811	N:GEXP:TCOF1:chr5:149737202:149779871:+:	TCOF1	GEXP	5	149737202	149779871	500000000	36	43.9	0.558	528
N:GEXP:RBM14:chr11:66384053:66435858:+:	RBM14	GEXP	11	66384053	66435858	N:GEXP:TCOF1:chr5:149737202:149779871:+:	TCOF1	GEXP	5	149737202	149779871	500000000	35.6	43.5	0.556	528
N:GEXP:ARHGEF11:chr1:156904632:157015162:-:	ARHGEF11	GEXP	1	156904632	157015162	N:GEXP:TCOF1:chr5:149737202:149779871:+:	TCOF1	GEXP	5	149737202	149779871	500000000	35.4	43.3	0.555	528
N:GEXP:NOLC1:chr10:103911933:103923627:+:	NOLC1	GEXP	10	103911933	103923627	N:GEXP:TCOF1:chr5:149737202:149779871:+:	TCOF1	GEXP	5	149737202	149779871	500000000	35.3	43.2	0.554	528
N:GEXP:MAST2:chr1:46269285:46501796:+:	MAST2	GEXP	1	46269285	46501796	N:GEXP:TCOF1:chr5:149737202:149779871:+:	TCOF1	GEXP	5	149737202	149779871	500000000	35.1	43	0.553	528
N:GEXP:NUP50:chr22:45559726:45583890:+:	NUP50	GEXP	22	45559726	45583890	N:GEXP:TCOF1:chr5:149737202:149779871:+:	TCOF1	GEXP	5	149737202	149779871	500000000	35.2	43	0.554	528
N:GEXP:BRPF1:chr3:9773434:9789699:+:	BRPF1	GEXP	3	9773434	9789699	N:GEXP:TCOF1:chr5:149737202:149779871:+:	TCOF1	GEXP	5	149737202	149779871	500000000	35.1	42.9	0.553	528
N:GEXP:TCOF1:chr5:149737202:149779871:+:	TCOF1	GEXP	5	149737202	149779871	N:GEXP:ZCCHC14:chr16:87439852:87525460:-:	ZCCHC14	GEXP	16	87439852	87525460	500000000	34.6	42.4	0.55	528
N:GEXP:CHD4:chr12:6679248:6716551:-:	CHD4	GEXP	12	6679248	6716551	N:GEXP:TCOF1:chr5:149737202:149779871:+:	TCOF1	GEXP	5	149737202	149779871	500000000	34.5	42.4	0.55	528
N:GEXP:TCOF1:chr5:149737202:149779871:+:	TCOF1	GEXP	5	149737202	149779871	N:GEXP:ZNF609:chr15:64752941:64978266:+:	ZNF609	GEXP	15	64752941	64978266	500000000	34.5	42.3	0.55	528
N:GEXP:PAXIP1:chr7:154735400:154794682:-:	PAXIP1	GEXP	7	154735400	154794682	N:GEXP:TCOF1:chr5:149737202:149779871:+:	TCOF1	GEXP	5	149737202	149779871	500000000	34.4	42.3	0.55	528
N:GEXP:SEC24C:chr10:75504131:75531933:+:	SEC24C	GEXP	10	75504131	75531933	N:GEXP:TCOF1:chr5:149737202:149779871:+:	TCOF1	GEXP	5	149737202	149779871	500000000	34.4	42.3	0.55	528
N:GEXP:DDX42:chr17:61851567:61896677:+:	DDX42	GEXP	17	61851567	61896677	N:GEXP:TCOF1:chr5:149737202:149779871:+:	TCOF1	GEXP	5	149737202	149779871	500000000	34.3	42.2	0.549	528
N:GEXP:MDC1:chr6:30667584:30685458:-:	MDC1	GEXP	6	30667584	30685458	N:GEXP:TCOF1:chr5:149737202:149779871:+:	TCOF1	GEXP	5	149737202	149779871	500000000	34.2	42.1	0.549	528
N:GEXP:ABCF1:chr6:30539170:30559309:+:	ABCF1	GEXP	6	30539170	30559309	N:GEXP:TCOF1:chr5:149737202:149779871:+:	TCOF1	GEXP	5	149737202	149779871	500000000	34.2	42.1	0.549	528
N:GEXP:RRS1:chr8:67341263:67342968:+:	RRS1	GEXP	8	67341263	67342968	N:GEXP:TCOF1:chr5:149737202:149779871:+:	TCOF1	GEXP	5	149737202	149779871	500000000	34.2	42	0.548	528
N:GEXP:HNRNPU:chr1:245013602:245027827:-:	HNRNPU	GEXP	1	245013602	245027827	N:GEXP:TCOF1:chr5:149737202:149779871:+:	TCOF1	GEXP	5	149737202	149779871	500000000	34	41.9	0.547	528
N:GEXP:BICD2:chr9:95473645:95527083:-:	BICD2	GEXP	9	95473645	95527083	N:GEXP:TCOF1:chr5:149737202:149779871:+:	TCOF1	GEXP	5	149737202	149779871	500000000	34	41.9	0.547	528
N:GEXP:RANGAP1:chr22:41641615:41682216:-:	RANGAP1	GEXP	22	41641615	41682216	N:GEXP:TCOF1:chr5:149737202:149779871:+:	TCOF1	GEXP	5	149737202	149779871	500000000	33.8	41.7	0.546	528
N:GEXP:HNRNPA2B1:chr7:26229556:26240413:-:	HNRNPA2B1	GEXP	7	26229556	26240413	N:GEXP:TCOF1:chr5:149737202:149779871:+:	TCOF1	GEXP	5	149737202	149779871	500000000	33.7	41.6	0.546	528
N:GEXP:SLC5A6:chr2:27422455:27435175:-:	SLC5A6	GEXP	2	27422455	27435175	N:GEXP:TCOF1:chr5:149737202:149779871:+:	TCOF1	GEXP	5	149737202	149779871	500000000	33.7	41.6	0.546	528
N:GEXP:EWSR1:chr22:29663998:29696515:+:	EWSR1	GEXP	22	29663998	29696515	N:GEXP:TCOF1:chr5:149737202:149779871:+:	TCOF1	GEXP	5	149737202	149779871	500000000	33.6	41.5	0.545	528
N:GEXP:ANAPC2:chr9:140069236:140083057:-:	ANAPC2	GEXP	9	140069236	140083057	N:GEXP:TCOF1:chr5:149737202:149779871:+:	TCOF1	GEXP	5	149737202	149779871	500000000	33.6	41.4	0.545	528
N:GEXP:NASP:chr1:46049660:46084578:+:	NASP	GEXP	1	46049660	46084578	N:GEXP:TCOF1:chr5:149737202:149779871:+:	TCOF1	GEXP	5	149737202	149779871	500000000	33.6	41.4	0.545	528
N:GEXP:BCOR:chrX:39910499:40036582:-:	BCOR	GEXP	X	39910499	40036582	N:GEXP:TCOF1:chr5:149737202:149779871:+:	TCOF1	GEXP	5	149737202	149779871	500000000	33.5	41.4	0.545	528
N:GEXP:MORC2:chr22:31322600:31364187:-:	MORC2	GEXP	22	31322600	31364187	N:GEXP:TCOF1:chr5:149737202:149779871:+:	TCOF1	GEXP	5	149737202	149779871	500000000	33.5	41.4	0.545	528
N:GEXP:DKC1:chrX:153991031:154005964:+:	DKC1	GEXP	X	153991031	154005964	N:GEXP:TCOF1:chr5:149737202:149779871:+:	TCOF1	GEXP	5	149737202	149779871	500000000	33.5	41.4	0.545	528
N:GEXP:REXO4:chr9:136271186:136283164:-:	REXO4	GEXP	9	136271186	136283164	N:GEXP:TCOF1:chr5:149737202:149779871:+:	TCOF1	GEXP	5	149737202	149779871	500000000	33.5	41.4	0.545	528
N:GEXP:SETD8:chr12:123868704:123893900:+:	SETD8	GEXP	12	123868704	123893900	N:GEXP:TCOF1:chr5:149737202:149779871:+:	TCOF1	GEXP	5	149737202	149779871	500000000	33.5	41.3	0.544	528
N:GEXP:SUPT16H:chr14:21819631:21852425:-:	SUPT16H	GEXP	14	21819631	21852425	N:GEXP:TCOF1:chr5:149737202:149779871:+:	TCOF1	GEXP	5	149737202	149779871	500000000	33.3	41.2	0.544	528
N:GEXP:CPSF6:chr12:69633317:69668138:+:	CPSF6	GEXP	12	69633317	69668138	N:GEXP:TCOF1:chr5:149737202:149779871:+:	TCOF1	GEXP	5	149737202	149779871	500000000	33	40.9	0.542	528
N:GEXP:ILF3:chr19:10764937:10803095:+:	ILF3	GEXP	19	10764937	10803095	N:GEXP:TCOF1:chr5:149737202:149779871:+:	TCOF1	GEXP	5	149737202	149779871	500000000	33.1	40.9	0.542	528
N:GEXP:DHX30:chr3:47844399:47891686:+:	DHX30	GEXP	3	47844399	47891686	N:GEXP:TCOF1:chr5:149737202:149779871:+:	TCOF1	GEXP	5	149737202	149779871	500000000	32.9	40.8	0.541	528
N:GEXP:MKI67:chr10:129894925:129924468:-:	MKI67	GEXP	10	129894925	129924468	N:GEXP:TCOF1:chr5:149737202:149779871:+:	TCOF1	GEXP	5	149737202	149779871	500000000	32.8	40.7	0.541	528
N:GEXP:SMC1A:chrX:53401070:53449618:-:	SMC1A	GEXP	X	53401070	53449618	N:GEXP:TCOF1:chr5:149737202:149779871:+:	TCOF1	GEXP	5	149737202	149779871	500000000	32.7	40.6	0.54	528
N:GEXP:DAXX:chr6:33286335:33290793:-:	DAXX	GEXP	6	33286335	33290793	N:GEXP:TCOF1:chr5:149737202:149779871:+:	TCOF1	GEXP	5	149737202	149779871	500000000	32.7	40.6	0.54	528
N:GEXP:MAD1L1:chr7:1855428:2272583:-:	MAD1L1	GEXP	7	1855428	2272583	N:GEXP:TCOF1:chr5:149737202:149779871:+:	TCOF1	GEXP	5	149737202	149779871	500000000	32.7	40.6	0.54	528
N:GEXP:BAG6:chr6:31606805:31620477:-:	BAG6	GEXP	6	31606805	31620477	N:GEXP:TCOF1:chr5:149737202:149779871:+:	TCOF1	GEXP	5	149737202	149779871	500000000	32.5	40.4	0.539	528
N:GEXP:FAM20B:chr1:178995074:179045702:+:	FAM20B	GEXP	1	178995074	179045702	N:GEXP:TCOF1:chr5:149737202:149779871:+:	TCOF1	GEXP	5	149737202	149779871	500000000	32.5	40.3	0.539	528
N:GEXP:GNL2:chr1:38032413:38061586:-:	GNL2	GEXP	1	38032413	38061586	N:GEXP:TCOF1:chr5:149737202:149779871:+:	TCOF1	GEXP	5	149737202	149779871	500000000	32.3	40.2	0.538	528
N:GEXP:SMG7:chr1:183441506:183523328:+:	SMG7	GEXP	1	183441506	183523328	N:GEXP:TCOF1:chr5:149737202:149779871:+:	TCOF1	GEXP	5	149737202	149779871	500000000	32.3	40.1	0.537	528
N:GEXP:JRK:chr8:143738874:143751401:-:	JRK	GEXP	8	143738874	143751401	N:GEXP:TCOF1:chr5:149737202:149779871:+:	TCOF1	GEXP	5	149737202	149779871	500000000	32.1	40	0.537	528
N:GEXP:KIAA1009:chr6:84833960:84937335:-:	KIAA1009	GEXP	6	84833960	84937335	N:GEXP:TCOF1:chr5:149737202:149779871:+:	TCOF1	GEXP	5	149737202	149779871	500000000	32.1	40	0.537	528
N:GEXP:CHD3:chr17:7788123:7816075:+:	CHD3	GEXP	17	7788123	7816075	N:GEXP:TCOF1:chr5:149737202:149779871:+:	TCOF1	GEXP	5	149737202	149779871	500000000	32	39.9	0.536	528
N:GEXP:BRD2:chr6:32936437:32949282:+:	BRD2	GEXP	6	32936437	32949282	N:GEXP:TCOF1:chr5:149737202:149779871:+:	TCOF1	GEXP	5	149737202	149779871	500000000	32	39.9	0.536	528
N:GEXP:POLR3E:chr16:22308741:22345343:+:	POLR3E	GEXP	16	22308741	22345343	N:GEXP:TCOF1:chr5:149737202:149779871:+:	TCOF1	GEXP	5	149737202	149779871	500000000	32.1	39.9	0.536	528
N:GEXP:TCOF1:chr5:149737202:149779871:+:	TCOF1	GEXP	5	149737202	149779871	N:GEXP:WDR46:chr6:33246880:33257304:-:	WDR46	GEXP	6	33246880	33257304	500000000	32	39.8	0.536	528
N:GEXP:TCOF1:chr5:149737202:149779871:+:	TCOF1	GEXP	5	149737202	149779871	N:GEXP:ULK1:chr12:132379279:132407707:+:	ULK1	GEXP	12	132379279	132407707	500000000	32	39.8	0.536	528
N:GEXP:MYBBP1A:chr17:4442191:4458681:-:	MYBBP1A	GEXP	17	4442191	4458681	N:GEXP:TCOF1:chr5:149737202:149779871:+:	TCOF1	GEXP	5	149737202	149779871	500000000	31.8	39.7	0.535	528
N:GEXP:TCOF1:chr5:149737202:149779871:+:	TCOF1	GEXP	5	149737202	149779871	N:GEXP:UBE2G2:chr21:46188495:46221751:-:	UBE2G2	GEXP	21	46188495	46221751	500000000	31.7	39.6	0.534	528
N:GEXP:PHF8:chrX:53963113:54071569:-:	PHF8	GEXP	X	53963113	54071569	N:GEXP:TCOF1:chr5:149737202:149779871:+:	TCOF1	GEXP	5	149737202	149779871	500000000	31.8	39.6	0.535	528
N:GEXP:TCOF1:chr5:149737202:149779871:+:	TCOF1	GEXP	5	149737202	149779871	N:GEXP:ZNF281:chr1:200375420:200379166:-:	ZNF281	GEXP	1	200375420	200379166	500000000	31.7	39.5	0.534	528
N:GEXP:TCOF1:chr5:149737202:149779871:+:	TCOF1	GEXP	5	149737202	149779871	N:GEXP:UBXN7:chr3:196080369:196159345:-:	UBXN7	GEXP	3	196080369	196159345	500000000	31.6	39.5	0.534	528
N:GEXP:TACC3:chr4:1723217:1746905:+:	TACC3	GEXP	4	1723217	1746905	N:GEXP:TCOF1:chr5:149737202:149779871:+:	TCOF1	GEXP	5	149737202	149779871	500000000	31.5	39.4	0.533	528
N:GEXP:GOLGA2:chr9:131018108:131038268:-:	GOLGA2	GEXP	9	131018108	131038268	N:GEXP:TCOF1:chr5:149737202:149779871:+:	TCOF1	GEXP	5	149737202	149779871	500000000	31.6	39.4	0.534	528
N:GEXP:TCOF1:chr5:149737202:149779871:+:	TCOF1	GEXP	5	149737202	149779871	N:GEXP:TSC2:chr16:2097990:2138713:+:	TSC2	GEXP	16	2097990	2138713	500000000	31.4	39.3	0.533	528
N:GEXP:SFPQ:chr1:35649201:35658743:-:	SFPQ	GEXP	1	35649201	35658743	N:GEXP:TCOF1:chr5:149737202:149779871:+:	TCOF1	GEXP	5	149737202	149779871	500000000	31.4	39.3	0.533	528
N:GEXP:PWP2:chr21:45527208:45551063:+:	PWP2	GEXP	21	45527208	45551063	N:GEXP:TCOF1:chr5:149737202:149779871:+:	TCOF1	GEXP	5	149737202	149779871	500000000	31.5	39.3	0.533	528
N:GEXP:GCN1L1:chr12:120565014:120632513:-:	GCN1L1	GEXP	12	120565014	120632513	N:GEXP:TCOF1:chr5:149737202:149779871:+:	TCOF1	GEXP	5	149737202	149779871	500000000	31.4	39.2	0.532	528
N:GEXP:MEN1:chr11:64570986:64578766:-:	MEN1	GEXP	11	64570986	64578766	N:GEXP:TCOF1:chr5:149737202:149779871:+:	TCOF1	GEXP	5	149737202	149779871	500000000	31.3	39.2	0.532	528
N:GEXP:RPRD2:chr1:150336990:150449041:+:	RPRD2	GEXP	1	150336990	150449041	N:GEXP:TCOF1:chr5:149737202:149779871:+:	TCOF1	GEXP	5	149737202	149779871	500000000	31.3	39.2	0.532	528
N:GEXP:MCM3:chr6:52128812:52149582:-:	MCM3	GEXP	6	52128812	52149582	N:GEXP:TCOF1:chr5:149737202:149779871:+:	TCOF1	GEXP	5	149737202	149779871	500000000	31.3	39.2	0.532	528
N:GEXP:TCOF1:chr5:149737202:149779871:+:	TCOF1	GEXP	5	149737202	149779871	N:METH:BUD13:chr11:116643266:::cg06418878	BUD13 cg06418878	METH	11	116643266		500000000	13.2	21.7	0.487	353
N:GEXP:TCOF1:chr5:149737202:149779871:+:	TCOF1	GEXP	5	149737202	149779871	N:METH:PPP5C:chr19:46850482:::cg10480741	PPP5C cg10480741	METH	19	46850482		500000000	12.9	21.4	0.484	353
N:GEXP:TCOF1:chr5:149737202:149779871:+:	TCOF1	GEXP	5	149737202	149779871	N:METH:TMEM43:chr3:14166502:::cg00661202	TMEM43 cg00661202	METH	3	14166502		500000000	12.8	21.3	0.529	286
N:GEXP:TCOF1:chr5:149737202:149779871:+:	TCOF1	GEXP	5	149737202	149779871	N:METH:CASD1:chr7:94138743:::cg21974766	CASD1 cg21974766	METH	7	94138743		500000000	12.4	20.9	0.48	352
N:GEXP:TCOF1:chr5:149737202:149779871:+:	TCOF1	GEXP	5	149737202	149779871	N:METH:PARD3:chr10:35103869:::cg07452799	PARD3 cg07452799	METH	10	35103869		500000000	12.3	20.8	0.478	353
N:GEXP:TCOF1:chr5:149737202:149779871:+:	TCOF1	GEXP	5	149737202	149779871	N:METH:UQCRQ:chr5:132202635:::cg05040447	UQCRQ cg05040447	METH	5	132202635		17534567	12.1	20.6	0.475	353
N:GEXP:TCOF1:chr5:149737202:149779871:+:	TCOF1	GEXP	5	149737202	149779871	N:METH:LRRC8D:chr1:90287278:::cg11208880	LRRC8D cg11208880	METH	1	90287278		500000000	12.1	20.6	0.476	353
N:GEXP:TCOF1:chr5:149737202:149779871:+:	TCOF1	GEXP	5	149737202	149779871	N:METH:MARK3:chr14:103851370:::cg15444978	MARK3 cg15444978	METH	14	103851370		500000000	12	20.5	0.475	353
N:GEXP:TCOF1:chr5:149737202:149779871:+:	TCOF1	GEXP	5	149737202	149779871	N:METH:HSF2:chr6:122720929:::cg12657853	HSF2 cg12657853	METH	6	122720929		500000000	12	20.5	0.475	353
N:GEXP:TCOF1:chr5:149737202:149779871:+:	TCOF1	GEXP	5	149737202	149779871	N:METH:ACTL6A:chr3:179280646:::cg25198545	ACTL6A cg25198545	METH	3	179280646		500000000	11.9	20.4	0.473	353
N:GEXP:TCOF1:chr5:149737202:149779871:+:	TCOF1	GEXP	5	149737202	149779871	N:METH:ZNF174:chr16:3451181:::cg13919607	ZNF174 cg13919607	METH	16	3451181		500000000	11.8	20.3	0.478	345
N:GEXP:TCOF1:chr5:149737202:149779871:+:	TCOF1	GEXP	5	149737202	149779871	N:METH:MYEF2:chr15:48469952:::cg21229859	MYEF2 cg21229859	METH	15	48469952		500000000	11.8	20.3	0.472	353
N:GEXP:TCOF1:chr5:149737202:149779871:+:	TCOF1	GEXP	5	149737202	149779871	N:METH:SLC36A1:chr5:150827447:::cg14104257	SLC36A1 cg14104257	METH	5	150827447		1047576	11.5	20	0.47	353
N:GEXP:TCOF1:chr5:149737202:149779871:+:	TCOF1	GEXP	5	149737202	149779871	N:METH:RIC8A:chr11:208948:::cg05086873	RIC8A cg05086873	METH	11	208948		500000000	11.5	20	0.469	353
N:GEXP:TCOF1:chr5:149737202:149779871:+:	TCOF1	GEXP	5	149737202	149779871	N:METH:C1orf109:chr1:38156051:::cg26649834	C1orf109 cg26649834	METH	1	38156051		500000000	11.5	20	0.469	353
N:GEXP:TCOF1:chr5:149737202:149779871:+:	TCOF1	GEXP	5	149737202	149779871	N:METH:SEZ6L:chr22:26566058:::cg25468723	SEZ6L cg25468723	METH	22	26566058		500000000	11.4	19.9	0.468	353
N:GEXP:TCOF1:chr5:149737202:149779871:+:	TCOF1	GEXP	5	149737202	149779871	N:METH:HNRNPH1:chr5:179050963:::cg19723775	HNRNPH1 cg19723775	METH	5	179050963		29271092	11.4	19.9	0.468	353
N:GEXP:TCOF1:chr5:149737202:149779871:+:	TCOF1	GEXP	5	149737202	149779871	N:METH:ZNF136:chr19:12273886:::cg04311606	ZNF136 cg04311606	METH	19	12273886		500000000	11.4	19.9	0.468	352
N:GEXP:TCOF1:chr5:149737202:149779871:+:	TCOF1	GEXP	5	149737202	149779871	N:METH:PREP:chr6:105851256:::cg06218044	PREP cg06218044	METH	6	105851256		500000000	11.3	19.8	0.467	353
N:GEXP:TCOF1:chr5:149737202:149779871:+:	TCOF1	GEXP	5	149737202	149779871	N:METH:NEK9:chr14:75593525:::cg17261830	NEK9 cg17261830	METH	14	75593525		500000000	11.3	19.8	0.467	353
N:GEXP:TCOF1:chr5:149737202:149779871:+:	TCOF1	GEXP	5	149737202	149779871	N:METH:HEATR6:chr17:58156231:::cg07567107	HEATR6 cg07567107	METH	17	58156231		500000000	11.3	19.8	0.467	353
N:GEXP:TCOF1:chr5:149737202:149779871:+:	TCOF1	GEXP	5	149737202	149779871	N:METH:ENPP1:chr6:132128945:::cg05417985	ENPP1 cg05417985	METH	6	132128945		500000000	11.3	19.8	0.467	353
N:GEXP:TCOF1:chr5:149737202:149779871:+:	TCOF1	GEXP	5	149737202	149779871	N:METH:WDR65:chr1:43638094:::cg13342625	WDR65 cg13342625	METH	1	43638094		500000000	11.2	19.7	0.466	353
N:GEXP:TCOF1:chr5:149737202:149779871:+:	TCOF1	GEXP	5	149737202	149779871	N:METH:CKLF:chr16:66586309:::cg19510999	CKLF cg19510999	METH	16	66586309		500000000	11.1	19.6	0.464	353
N:GEXP:TCOF1:chr5:149737202:149779871:+:	TCOF1	GEXP	5	149737202	149779871	N:METH:BRWD1:chr21:40686185:::cg22982528	BRWD1 cg22982528	METH	21	40686185		500000000	11.1	19.6	0.465	353
N:GEXP:TCOF1:chr5:149737202:149779871:+:	TCOF1	GEXP	5	149737202	149779871	N:METH:ANKRD10:chr13:111567140:::cg04467034	ANKRD10 cg04467034	METH	13	111567140		500000000	11.1	19.6	0.465	353
N:GEXP:TCOF1:chr5:149737202:149779871:+:	TCOF1	GEXP	5	149737202	149779871	N:METH:AHCY:chr20:32891089:::cg04025889	AHCY cg04025889	METH	20	32891089		500000000	11.1	19.6	0.465	353
N:GEXP:TCOF1:chr5:149737202:149779871:+:	TCOF1	GEXP	5	149737202	149779871	N:METH:DAZAP2:chr12:51632663:::cg21686900	DAZAP2 cg21686900	METH	12	51632663		500000000	11.1	19.6	0.465	353
N:GEXP:TCOF1:chr5:149737202:149779871:+:	TCOF1	GEXP	5	149737202	149779871	N:METH:CASP7:chr10:115438910:::cg22906389	CASP7 cg22906389	METH	10	115438910		500000000	11	19.5	0.464	352
N:GEXP:TCOF1:chr5:149737202:149779871:+:	TCOF1	GEXP	5	149737202	149779871	N:METH:C20orf27:chr20:3749519:::cg14159818	C20orf27 cg14159818	METH	20	3749519		500000000	11	19.5	0.463	353
N:GEXP:TCOF1:chr5:149737202:149779871:+:	TCOF1	GEXP	5	149737202	149779871	N:METH:UBTF:chr17:42295591:::cg10183248	UBTF cg10183248	METH	17	42295591		500000000	11	19.5	0.463	353
N:GEXP:TCOF1:chr5:149737202:149779871:+:	TCOF1	GEXP	5	149737202	149779871	N:METH:SLC25A12:chr2:172750661:::cg10446968	SLC25A12 cg10446968	METH	2	172750661		500000000	11	19.5	0.464	353
N:GEXP:TCOF1:chr5:149737202:149779871:+:	TCOF1	GEXP	5	149737202	149779871	N:METH:RNF19A:chr8:101321928:::cg14358709	RNF19A cg14358709	METH	8	101321928		500000000	11	19.5	0.464	353
N:GEXP:TCOF1:chr5:149737202:149779871:+:	TCOF1	GEXP	5	149737202	149779871	N:METH:MAF:chr16:79634732:::cg10689889	MAF cg10689889	METH	16	79634732		500000000	11	19.5	0.464	353
N:GEXP:TCOF1:chr5:149737202:149779871:+:	TCOF1	GEXP	5	149737202	149779871	N:METH:CPE:chr4:166300290:::cg02886284	CPE cg02886284	METH	4	166300290		500000000	10.9	19.4	0.463	353
N:GEXP:TCOF1:chr5:149737202:149779871:+:	TCOF1	GEXP	5	149737202	149779871	N:METH:CBR4:chr4:169931597:::cg13260633	CBR4 cg13260633	METH	4	169931597		500000000	10.9	19.4	0.462	353
N:GEXP:TCOF1:chr5:149737202:149779871:+:	TCOF1	GEXP	5	149737202	149779871	N:METH:SPRED3:chr19:38879673:::cg26853640	SPRED3 cg26853640	METH	19	38879673		500000000	10.8	19.3	0.462	353
N:GEXP:TCOF1:chr5:149737202:149779871:+:	TCOF1	GEXP	5	149737202	149779871	N:METH:MSH3:chr5:79950611:::cg07526021	MSH3 cg07526021	METH	5	79950611		69786591	10.8	19.3	0.461	353
N:GEXP:TCOF1:chr5:149737202:149779871:+:	TCOF1	GEXP	5	149737202	149779871	N:METH:MAGI3:chr1:113933172:::cg20758803	MAGI3 cg20758803	METH	1	113933172		500000000	10.8	19.3	0.461	353
N:GEXP:TCOF1:chr5:149737202:149779871:+:	TCOF1	GEXP	5	149737202	149779871	N:METH:NAGLU:chr17:40688138:::cg25664725	NAGLU cg25664725	METH	17	40688138		500000000	10.7	19.2	0.461	353
N:GEXP:TCOF1:chr5:149737202:149779871:+:	TCOF1	GEXP	5	149737202	149779871	N:METH:C19orf56:chr19:12780323:::cg19191883	C19orf56 cg19191883	METH	19	12780323		500000000	10.7	19.2	0.461	353
N:GEXP:TCOF1:chr5:149737202:149779871:+:	TCOF1	GEXP	5	149737202	149779871	N:METH:VPS39:chr15:42500342:::cg25122941	VPS39 cg25122941	METH	15	42500342		500000000	10.7	19.2	0.477	326
N:GEXP:TCOF1:chr5:149737202:149779871:+:	TCOF1	GEXP	5	149737202	149779871	N:METH:VPS36:chr13:53024717:::cg02543879	VPS36 cg02543879	METH	13	53024717		500000000	10.7	19.2	0.46	353
N:GEXP:TCOF1:chr5:149737202:149779871:+:	TCOF1	GEXP	5	149737202	149779871	N:METH:RBM17:chr10:6131472:::cg02863237	RBM17 cg02863237	METH	10	6131472		500000000	10.7	19.2	0.461	353
N:GEXP:TCOF1:chr5:149737202:149779871:+:	TCOF1	GEXP	5	149737202	149779871	N:METH:PTBP1:chr19:797459:::cg25536300	PTBP1 cg25536300	METH	19	797459		500000000	10.7	19.2	0.46	353
N:GEXP:TCOF1:chr5:149737202:149779871:+:	TCOF1	GEXP	5	149737202	149779871	N:METH:KCNF1:chr2:11051991:::cg03402876	KCNF1 cg03402876	METH	2	11051991		500000000	10.6	19.1	0.46	353
N:GEXP:TCOF1:chr5:149737202:149779871:+:	TCOF1	GEXP	5	149737202	149779871	N:METH:IFIT5:chr10:91174651:::cg05338155	IFIT5 cg05338155	METH	10	91174651		500000000	10.6	19.1	0.46	353
N:GEXP:TCOF1:chr5:149737202:149779871:+:	TCOF1	GEXP	5	149737202	149779871	N:METH:HEXA:chr15:72668269:::cg13587740	HEXA cg13587740	METH	15	72668269		500000000	10.6	19.1	0.459	353
N:GEXP:TCOF1:chr5:149737202:149779871:+:	TCOF1	GEXP	5	149737202	149779871	N:METH:FAM160A2:chr11:6255841:::cg20916483	FAM160A2 cg20916483	METH	11	6255841		500000000	10.6	19.1	0.459	353
N:GEXP:TCOF1:chr5:149737202:149779871:+:	TCOF1	GEXP	5	149737202	149779871	N:METH:HNRNPAB:chr5:177631246:::cg17587934	HNRNPAB cg17587934	METH	5	177631246		27851375	10.5	19	0.458	353
N:GEXP:TCOF1:chr5:149737202:149779871:+:	TCOF1	GEXP	5	149737202	149779871	N:METH:HIVEP1:chr6:12012564:::cg07782113	HIVEP1 cg07782113	METH	6	12012564		500000000	10.5	19	0.458	353
N:GEXP:TCOF1:chr5:149737202:149779871:+:	TCOF1	GEXP	5	149737202	149779871	N:METH:HCCA2:chr11:1593657:::cg23121547	HCCA2 cg23121547	METH	11	1593657		500000000	10.5	19	0.458	353

## Sheet: HNSC
id_a	pretty_label_a	datatype_a	chr_a	start_a	end_a	id_b	pretty_label_b	datatype_b	chr_b	start_b	end_b	link_distance	adj_logged_pvalue	logged_pvalue	correlation	num_nonna
N:GEXP:GEMIN5:chr5:154266976:154317776:-:25929	GEMIN5	GEXP	5	154266976	154317776	N:GEXP:TCOF1:chr5:149737202:149779871:+:6949	TCOF1	GEXP	5	149737202	149779871	4487105	32.5	40.6	0.671	303
N:GEXP:TCERG1:chr5:145826873:145891069:+:10915	TCERG1	GEXP	5	145826873	145891069	N:GEXP:TCOF1:chr5:149737202:149779871:+:6949	TCOF1	GEXP	5	149737202	149779871	3846133	31.3	39.4	0.663	303
N:GEXP:PKMYT1:chr16:3022792:3030540:-:9088	PKMYT1	GEXP	16	3022792	3030540	N:GEXP:TCOF1:chr5:149737202:149779871:+:6949	TCOF1	GEXP	5	149737202	149779871	500000000	28.1	36.1	0.642	303
N:GEXP:KIF20A:chr5:137514417:137523404:+:10112	KIF20A	GEXP	5	137514417	137523404	N:GEXP:TCOF1:chr5:149737202:149779871:+:6949	TCOF1	GEXP	5	149737202	149779871	12213798	26.3	34.3	0.629	303
N:GEXP:POLD1:chr19:50887593:50921271:+:5424	POLD1	GEXP	19	50887593	50921271	N:GEXP:TCOF1:chr5:149737202:149779871:+:6949	TCOF1	GEXP	5	149737202	149779871	500000000	25.9	33.9	0.626	303
N:GEXP:LARP1:chr5:154092462:154197163:+:23367	LARP1	GEXP	5	154092462	154197163	N:GEXP:TCOF1:chr5:149737202:149779871:+:6949	TCOF1	GEXP	5	149737202	149779871	4312591	21.6	29.7	0.593	303
N:GEXP:HSPA9:chr5:137890571:137911318:-:3313	HSPA9	GEXP	5	137890571	137911318	N:GEXP:TCOF1:chr5:149737202:149779871:+:6949	TCOF1	GEXP	5	149737202	149779871	11825884	20.6	28.7	0.584	303
N:GEXP:HMMR:chr5:162887517:162918953:+:3161	HMMR	GEXP	5	162887517	162918953	N:GEXP:TCOF1:chr5:149737202:149779871:+:6949	TCOF1	GEXP	5	149737202	149779871	13107646	19.9	28	0.578	303
N:GEXP:HNRNPAB:chr5:177631508:177638184:+:3182	HNRNPAB	GEXP	5	177631508	177638184	N:GEXP:TCOF1:chr5:149737202:149779871:+:6949	TCOF1	GEXP	5	149737202	149779871	27851637	19.3	27.3	0.572	303
N:GEXP:CDT1:chr16:88870186:88875666:+:81620	CDT1	GEXP	16	88870186	88875666	N:GEXP:TCOF1:chr5:149737202:149779871:+:6949	TCOF1	GEXP	5	149737202	149779871	500000000	18.4	26.5	0.565	303
N:GEXP:CDC25C:chr5:137620959:137674044:-:995	CDC25C	GEXP	5	137620959	137674044	N:GEXP:TCOF1:chr5:149737202:149779871:+:6949	TCOF1	GEXP	5	149737202	149779871	12063158	18.2	26.3	0.563	303
N:GEXP:CCNB1:chr5:68462837:68474070:+:891	CCNB1	GEXP	5	68462837	68474070	N:GEXP:TCOF1:chr5:149737202:149779871:+:6949	TCOF1	GEXP	5	149737202	149779871	81263132	18.3	26.3	0.563	303
N:GEXP:G3BP1:chr5:151151476:151184915:+:10146	G3BP1	GEXP	5	151151476	151184915	N:GEXP:TCOF1:chr5:149737202:149779871:+:6949	TCOF1	GEXP	5	149737202	149779871	1371605	17.9	26	0.56	303
N:GEXP:HARS2:chr5:140071018:140078890:+:23438	HARS2	GEXP	5	140071018	140078890	N:GEXP:TCOF1:chr5:149737202:149779871:+:6949	TCOF1	GEXP	5	149737202	149779871	9658312	17.8	25.9	0.559	303
N:GEXP:MKI67:chr10:129894925:129924468:-:4288	MKI67	GEXP	10	129894925	129924468	N:GEXP:TCOF1:chr5:149737202:149779871:+:6949	TCOF1	GEXP	5	149737202	149779871	500000000	15.9	24	0.541	303
N:GEXP:TCOF1:chr5:149737202:149779871:+:6949	TCOF1	GEXP	5	149737202	149779871	N:GEXP:TONSL:chr8:145654163:145669812:-:4796	TONSL	GEXP	8	145654163	145669812	500000000	15.8	23.8	0.539	303
N:GEXP:RBM22:chr5:150070352:150080669:-:55696	RBM22	GEXP	5	150070352	150080669	N:GEXP:TCOF1:chr5:149737202:149779871:+:6949	TCOF1	GEXP	5	149737202	149779871	290481	15	23	0.531	303
N:GEXP:NPM1:chr5:170814708:170837888:+:4869	NPM1	GEXP	5	170814708	170837888	N:GEXP:TCOF1:chr5:149737202:149779871:+:6949	TCOF1	GEXP	5	149737202	149779871	21034837	14.8	22.9	0.53	303
N:GEXP:LMNB1:chr5:126112315:126172712:+:4001	LMNB1	GEXP	5	126112315	126172712	N:GEXP:TCOF1:chr5:149737202:149779871:+:6949	TCOF1	GEXP	5	149737202	149779871	23564490	14.5	22.6	0.527	303
N:GEXP:TCOF1:chr5:149737202:149779871:+:6949	TCOF1	GEXP	5	149737202	149779871	N:GEXP:WDR55:chr5:140044384:140050553:+:54853	WDR55	GEXP	5	140044384	140050553	9686649	14.2	22.3	0.523	303
N:GEXP:DBF4B:chr17:42785976:42829636:+:80174	DBF4B	GEXP	17	42785976	42829636	N:GEXP:TCOF1:chr5:149737202:149779871:+:6949	TCOF1	GEXP	5	149737202	149779871	500000000	14.2	22.3	0.524	303
N:GEXP:CDC23:chr5:137523337:137549032:-:8697	CDC23	GEXP	5	137523337	137549032	N:GEXP:TCOF1:chr5:149737202:149779871:+:6949	TCOF1	GEXP	5	149737202	149779871	12188170	14.2	22.3	0.524	303
N:GEXP:KIF18B:chr17:43002082:43025082:-:146909	KIF18B	GEXP	17	43002082	43025082	N:GEXP:TCOF1:chr5:149737202:149779871:+:6949	TCOF1	GEXP	5	149737202	149779871	500000000	14.3	22.3	0.524	303
N:GEXP:GRK6:chr5:176853687:176869850:+:2870	GRK6	GEXP	5	176853687	176869850	N:GEXP:TCOF1:chr5:149737202:149779871:+:6949	TCOF1	GEXP	5	149737202	149779871	27073816	14	22.1	0.521	303
N:GEXP:SRRT:chr7:100472701:100486285:+:51593	SRRT	GEXP	7	100472701	100486285	N:GEXP:TCOF1:chr5:149737202:149779871:+:6949	TCOF1	GEXP	5	149737202	149779871	500000000	13.9	22	0.52	303
N:GEXP:PTTG3P:chr8:67679632:67680240:-:26255	PTTG3P	GEXP	8	67679632	67680240	N:GEXP:TCOF1:chr5:149737202:149779871:+:6949	TCOF1	GEXP	5	149737202	149779871	500000000	13.9	22	0.521	303
N:GEXP:PTTG1:chr5:159848865:159855746:+:9232	PTTG1	GEXP	5	159848865	159855746	N:GEXP:TCOF1:chr5:149737202:149779871:+:6949	TCOF1	GEXP	5	149737202	149779871	10068994	13.9	22	0.52	303
N:GEXP:CDC20:chr1:43824626:43828873:+:991	CDC20	GEXP	1	43824626	43828873	N:GEXP:TCOF1:chr5:149737202:149779871:+:6949	TCOF1	GEXP	5	149737202	149779871	500000000	13.7	21.8	0.518	303
N:GEXP:CDC25A:chr3:48198668:48229801:-:993	CDC25A	GEXP	3	48198668	48229801	N:GEXP:TCOF1:chr5:149737202:149779871:+:6949	TCOF1	GEXP	5	149737202	149779871	500000000	13.5	21.6	0.516	303
N:GEXP:MAML1:chr5:179159851:179223512:+:9794	MAML1	GEXP	5	179159851	179223512	N:GEXP:TCOF1:chr5:149737202:149779871:+:6949	TCOF1	GEXP	5	149737202	149779871	29379980	13.6	21.6	0.517	303
N:GEXP:CCNF:chr16:2479395:2508859:+:899	CCNF	GEXP	16	2479395	2508859	N:GEXP:TCOF1:chr5:149737202:149779871:+:6949	TCOF1	GEXP	5	149737202	149779871	500000000	13.1	21.2	0.512	303
N:GEXP:SNRPA:chr19:41256759:41271297:+:6626	SNRPA	GEXP	19	41256759	41271297	N:GEXP:TCOF1:chr5:149737202:149779871:+:6949	TCOF1	GEXP	5	149737202	149779871	500000000	12.8	20.9	0.508	303
N:GEXP:MELK:chr9:36572905:36677679:+:9833	MELK	GEXP	9	36572905	36677679	N:GEXP:TCOF1:chr5:149737202:149779871:+:6949	TCOF1	GEXP	5	149737202	149779871	500000000	12.4	20.5	0.504	303
N:GEXP:NASP:chr1:46049660:46084578:+:4678	NASP	GEXP	1	46049660	46084578	N:GEXP:TCOF1:chr5:149737202:149779871:+:6949	TCOF1	GEXP	5	149737202	149779871	500000000	12.2	20.3	0.502	303
N:GEXP:IK:chr5:140027384:140042065:+:3550	IK	GEXP	5	140027384	140042065	N:GEXP:TCOF1:chr5:149737202:149779871:+:6949	TCOF1	GEXP	5	149737202	149779871	9695137	12.2	20.3	0.501	303
N:GEXP:ATAD2:chr8:124332091:124428590:-:29028	ATAD2	GEXP	8	124332091	124428590	N:GEXP:TCOF1:chr5:149737202:149779871:+:6949	TCOF1	GEXP	5	149737202	149779871	500000000	12.2	20.3	0.502	303
N:GEXP:TCOF1:chr5:149737202:149779871:+:6949	TCOF1	GEXP	5	149737202	149779871	N:GEXP:UIMC1:chr5:176332006:176433795:-:51720	UIMC1	GEXP	5	176332006	176433795	26552135	12.2	20.2	0.501	303
N:GEXP:TACC3:chr4:1723217:1746905:+:10460	TACC3	GEXP	4	1723217	1746905	N:GEXP:TCOF1:chr5:149737202:149779871:+:6949	TCOF1	GEXP	5	149737202	149779871	500000000	11.9	20	0.498	303
N:GEXP:KIF2C:chr1:45205490:45233438:+:11004	KIF2C	GEXP	1	45205490	45233438	N:GEXP:TCOF1:chr5:149737202:149779871:+:6949	TCOF1	GEXP	5	149737202	149779871	500000000	11.9	19.9	0.498	303
N:GEXP:TCOF1:chr5:149737202:149779871:+:6949	TCOF1	GEXP	5	149737202	149779871	N:GEXP:TRAIP:chr3:49866028:49893992:-:10293	TRAIP	GEXP	3	49866028	49893992	500000000	11.7	19.8	0.496	303
N:GEXP:SNRNP70:chr19:49588465:49611870:+:6625	SNRNP70	GEXP	19	49588465	49611870	N:GEXP:TCOF1:chr5:149737202:149779871:+:6949	TCOF1	GEXP	5	149737202	149779871	500000000	11.7	19.8	0.496	303
N:GEXP:FANCA:chr16:89803959:89883065:-:2175	FANCA	GEXP	16	89803959	89883065	N:GEXP:TCOF1:chr5:149737202:149779871:+:6949	TCOF1	GEXP	5	149737202	149779871	500000000	11.5	19.6	0.494	303
N:GEXP:CLEC2D:chr12:9822308:9852151:+:29121	CLEC2D	GEXP	12	9822308	9852151	N:GEXP:TCOF1:chr5:149737202:149779871:+:6949	TCOF1	GEXP	5	149737202	149779871	500000000	11.4	19.5	0.492	303
N:GEXP:BMS1:chr10:43277954:43330385:+:9790	BMS1	GEXP	10	43277954	43330385	N:GEXP:TCOF1:chr5:149737202:149779871:+:6949	TCOF1	GEXP	5	149737202	149779871	500000000	11.3	19.4	0.491	303
N:GEXP:KIFC1:chr6:33359313:33377699:+:3833	KIFC1	GEXP	6	33359313	33377699	N:GEXP:TCOF1:chr5:149737202:149779871:+:6949	TCOF1	GEXP	5	149737202	149779871	500000000	11.1	19.2	0.489	303
N:GEXP:RECQL4:chr8:145736667:145743210:-:9401	RECQL4	GEXP	8	145736667	145743210	N:GEXP:TCOF1:chr5:149737202:149779871:+:6949	TCOF1	GEXP	5	149737202	149779871	500000000	11.1	19.2	0.489	303
N:CNVR:5q32:chr5:140244000:150204999::	chr5:140,244,000-150,204,999 (10bp, 5q32)	CNVR	5	140244000	150204999	N:GEXP:TCOF1:chr5:149737202:149779871:+:6949	TCOF1	GEXP	5	149737202	149779871	0	11.5	19.2	0.492	299
N:CNVR:5q34:chr5:162862000:162862999::	chr5:162,862,000-162,862,999 (100kb, 5q34)	CNVR	5	162862000	162862999	N:GEXP:TCOF1:chr5:149737202:149779871:+:6949	TCOF1	GEXP	5	149737202	149779871	13082129	10.6	18.3	0.481	299
N:CNVR:5q33:chr5:151519000:155475999::	chr5:151,519,000-155,475,999 (4bp, 5q33)	CNVR	5	151519000	155475999	N:GEXP:TCOF1:chr5:149737202:149779871:+:6949	TCOF1	GEXP	5	149737202	149779871	1739129	10.3	18	0.478	299
N:CNVR:5q35.3:chr5:178114000:180374999::	chr5:178,114,000-180,374,999 (2bp, 5q35.3)	CNVR	5	178114000	180374999	N:GEXP:TCOF1:chr5:149737202:149779871:+:6949	TCOF1	GEXP	5	149737202	149779871	28334129	9.9	17.7	0.473	299
N:CNVR:5q33.1:chr5:150219000:151514999::	chr5:150,219,000-151,514,999 (1bp, 5q33.1)	CNVR	5	150219000	151514999	N:GEXP:TCOF1:chr5:149737202:149779871:+:6949	TCOF1	GEXP	5	149737202	149779871	439129	9.8	17.5	0.471	299
N:CNVR:DQ601567:chr5:178107000:178108999::	chr5:178,107,000-178,108,999 (2Mb, DQ601567)	CNVR	5	178107000	178108999	N:GEXP:TCOF1:chr5:149737202:149779871:+:6949	TCOF1	GEXP	5	149737202	149779871	28327129	9.5	17.3	0.468	299
N:CNVR:5q35.3:chr5:177307000:178106999::	chr5:177,307,000-178,106,999 (800Mb, 5q35.3)	CNVR	5	177307000	178106999	N:GEXP:TCOF1:chr5:149737202:149779871:+:6949	TCOF1	GEXP	5	149737202	149779871	27527129	9.5	17.3	0.468	299
N:CNVR:5q34:chr5:162863000:167086999::	chr5:162,863,000-167,086,999 (4bp, 5q34)	CNVR	5	162863000	167086999	N:GEXP:TCOF1:chr5:149737202:149779871:+:6949	TCOF1	GEXP	5	149737202	149779871	13083129	9.5	17.2	0.468	299
N:CNVR:5q35.3:chr5:176548569:176731866::Gistic_ROI_r_del	5q35.3 Deletion (Gistic, continuous)	CNVR	5	176548569	176731866	N:GEXP:TCOF1:chr5:149737202:149779871:+:6949	TCOF1	GEXP	5	149737202	149779871	26768698	9.3	17	0.465	299
N:CNVR:5q33:chr5:155496000:158825999::	chr5:155,496,000-158,825,999 (3bp, 5q33)	CNVR	5	155496000	158825999	N:GEXP:TCOF1:chr5:149737202:149779871:+:6949	TCOF1	GEXP	5	149737202	149779871	5716129	9.2	16.9	0.464	299
N:CNVR:5q35.1:chr5:167087000:171531999::	chr5:167,087,000-171,531,999 (4bp, 5q35.1)	CNVR	5	167087000	171531999	N:GEXP:TCOF1:chr5:149737202:149779871:+:6949	TCOF1	GEXP	5	149737202	149779871	17307129	9.2	16.9	0.464	299
N:CNVR:5q33.3:chr5:158826000:158829999::	chr5:158,826,000-158,829,999 (4Mb, 5q33.3)	CNVR	5	158826000	158829999	N:GEXP:TCOF1:chr5:149737202:149779871:+:6949	TCOF1	GEXP	5	149737202	149779871	9046129	9	16.8	0.462	299
N:CNVR:5q35:chr5:175470000:177197999::	chr5:175,470,000-177,197,999 (2bp, 5q35)	CNVR	5	175470000	177197999	N:GEXP:TCOF1:chr5:149737202:149779871:+:6949	TCOF1	GEXP	5	149737202	149779871	25690129	9.1	16.8	0.462	299
N:CNVR:5q34:chr5:158830000:162861999::	chr5:158,830,000-162,861,999 (4bp, 5q34)	CNVR	5	158830000	162861999	N:GEXP:TCOF1:chr5:149737202:149779871:+:6949	TCOF1	GEXP	5	149737202	149779871	9050129	8.9	16.7	0.46	299
N:CNVR:BTNL9:chr5:180434000:180538999::	chr5:180,434,000-180,538,999 (105Mb, BTNL9)	CNVR	5	180434000	180538999	N:GEXP:TCOF1:chr5:149737202:149779871:+:6949	TCOF1	GEXP	5	149737202	149779871	30654129	8.6	16.4	0.456	299
N:CNVR:5q35.3:chr5:180542000:180790000::	chr5:180,542,000-180,790,000 (248Mb, 5q35.3)	CNVR	5	180542000	180790000	N:GEXP:TCOF1:chr5:149737202:149779871:+:6949	TCOF1	GEXP	5	149737202	149779871	30762129	8.6	16.3	0.456	299
N:CNVR:5q35.2:chr5:173207000:175386999::	chr5:173,207,000-175,386,999 (2bp, 5q35.2)	CNVR	5	173207000	175386999	N:GEXP:TCOF1:chr5:149737202:149779871:+:6949	TCOF1	GEXP	5	149737202	149779871	23427129	8.4	16.1	0.453	299
N:CNVR:5q35.2:chr5:173205000:173206999::	chr5:173,205,000-173,206,999 (2Mb, 5q35.2)	CNVR	5	173205000	173206999	N:GEXP:TCOF1:chr5:149737202:149779871:+:6949	TCOF1	GEXP	5	149737202	149779871	23425129	8.2	15.9	0.451	299
N:CNVR:5q35:chr5:171534000:173204999::	chr5:171,534,000-173,204,999 (2bp, 5q35)	CNVR	5	171534000	173204999	N:GEXP:TCOF1:chr5:149737202:149779871:+:6949	TCOF1	GEXP	5	149737202	149779871	21754129	8	15.7	0.448	299
N:CNVR:STK10:chr5:171532000:171533999::	chr5:171,532,000-171,533,999 (2Mb, STK10)	CNVR	5	171532000	171533999	N:GEXP:TCOF1:chr5:149737202:149779871:+:6949	TCOF1	GEXP	5	149737202	149779871	21752129	7.8	15.5	0.445	299
N:CNVR:5q35.3:chr5:180539000:180541999::	chr5:180,539,000-180,541,999 (3Mb, 5q35.3)	CNVR	5	180539000	180541999	N:GEXP:TCOF1:chr5:149737202:149779871:+:6949	TCOF1	GEXP	5	149737202	149779871	30759129	7.5	15.2	0.441	299
N:CNVR:5q23.2:chr5:120937000:140222999::	chr5:120,937,000-140,222,999 (19bp, 5q23.2)	CNVR	5	120937000	140222999	N:GEXP:TCOF1:chr5:149737202:149779871:+:6949	TCOF1	GEXP	5	149737202	149779871	9514203	7.4	15.2	0.44	299
N:CNVR:THOC3:chr5:175394000:175464999::	chr5:175,394,000-175,464,999 (71Mb, THOC3)	CNVR	5	175394000	175464999	N:GEXP:TCOF1:chr5:149737202:149779871:+:6949	TCOF1	GEXP	5	149737202	149779871	25614129	6.6	14.4	0.429	299
N:CNVR:THOC3:chr5:175387000:175393999::	chr5:175,387,000-175,393,999 (7Mb, THOC3)	CNVR	5	175387000	175393999	N:GEXP:TCOF1:chr5:149737202:149779871:+:6949	TCOF1	GEXP	5	149737202	149779871	25607129	6.4	14.1	0.425	299
N:GEXP:TCOF1:chr5:149737202:149779871:+:6949	TCOF1	GEXP	5	149737202	149779871	N:RPPA:CCNB1:chr5:68462837:68474070:+:Cyclin_B1-R-V	CCNB1	RPPA	5	68462837	68474070	81263132	6.7	13.1	0.485	206
N:CNVR:5q23.1:chr5:117390000:120931999::	chr5:117,390,000-120,931,999 (4bp, 5q23.1)	CNVR	5	117390000	120931999	N:GEXP:TCOF1:chr5:149737202:149779871:+:6949	TCOF1	GEXP	5	149737202	149779871	28805203	5	12.8	0.404	299
N:GEXP:TCOF1:chr5:149737202:149779871:+:6949	TCOF1	GEXP	5	149737202	149779871	N:RPPA:CASP7:chr10:115438935:115490664:+:Caspase-7_cleavedD198-R-C	CASP7	RPPA	10	115438935	115490664	500000000	6.3	12.7	0.477	206
N:GEXP:TCOF1:chr5:149737202:149779871:+:6949	TCOF1	GEXP	5	149737202	149779871	N:METH:TEK:chr9:27109492:::cg09827833	TEK cg09827833	METH	9	27109492		500000000	4.2	12.7	0.402	301
N:CNVR:BTNL8:chr5:180375000:180377999::	chr5:180,375,000-180,377,999 (3Mb, BTNL8)	CNVR	5	180375000	180377999	N:GEXP:TCOF1:chr5:149737202:149779871:+:6949	TCOF1	GEXP	5	149737202	149779871	30595129	1.5	9.3	0.407	208

## Sheet: KIRC
id_a	pretty_label_a	datatype_a	chr_a	start_a	end_a	id_b	pretty_label_b	datatype_b	chr_b	start_b	end_b	link_distance	adj_logged_pvalue	logged_pvalue	correlation	num_nonna
N:GEXP:NOP2:chr12:6666037:6677480:-:4839	NOP2	GEXP	12	6666037	6677480	N:GEXP:TCOF1:chr5:149737202:149779871:+:6949	TCOF1	GEXP	5	149737202	149779871	500000000	73.9	82	0.707	538
N:GEXP:SAPS1:chr19:55741147:55770038:-:22870	SAPS1	GEXP	19	55741147	55770038	N:GEXP:TCOF1:chr5:149737202:149779871:+:6949	TCOF1	GEXP	5	149737202	149779871	500000000	68.7	76.8	0.691	538
N:GEXP:PUS1:chr12:132413745:132428406:+:80324	PUS1	GEXP	12	132413745	132428406	N:GEXP:TCOF1:chr5:149737202:149779871:+:6949	TCOF1	GEXP	5	149737202	149779871	500000000	65.9	74	0.682	538
N:GEXP:DTX2:chr7:76090972:76135312:+:113878	DTX2	GEXP	7	76090972	76135312	N:GEXP:TCOF1:chr5:149737202:149779871:+:6949	TCOF1	GEXP	5	149737202	149779871	500000000	65.3	73.4	0.68	538
N:GEXP:CCM2:chr7:45039345:45116069:+:83605	CCM2	GEXP	7	45039345	45116069	N:GEXP:TCOF1:chr5:149737202:149779871:+:6949	TCOF1	GEXP	5	149737202	149779871	500000000	63.3	71.4	0.673	538
N:GEXP:OGFR:chr20:61436177:61445352:+:11054	OGFR	GEXP	20	61436177	61445352	N:GEXP:TCOF1:chr5:149737202:149779871:+:6949	TCOF1	GEXP	5	149737202	149779871	500000000	62.8	70.8	0.671	538
N:GEXP:FBRS:chr16:30671243:30682131:+:64319	FBRS	GEXP	16	30671243	30682131	N:GEXP:TCOF1:chr5:149737202:149779871:+:6949	TCOF1	GEXP	5	149737202	149779871	500000000	61.4	69.5	0.666	538
N:GEXP:ARFGAP1:chr20:61904165:61921142:+:55738	ARFGAP1	GEXP	20	61904165	61921142	N:GEXP:TCOF1:chr5:149737202:149779871:+:6949	TCOF1	GEXP	5	149737202	149779871	500000000	61	69.1	0.664	538
N:GEXP:CCDC137:chr17:79633761:79640936:+:339230	CCDC137	GEXP	17	79633761	79640936	N:GEXP:TCOF1:chr5:149737202:149779871:+:6949	TCOF1	GEXP	5	149737202	149779871	500000000	60.3	68.3	0.662	538
N:GEXP:FBXL19:chr16:30934392:30960104:+:54620	FBXL19	GEXP	16	30934392	30960104	N:GEXP:TCOF1:chr5:149737202:149779871:+:6949	TCOF1	GEXP	5	149737202	149779871	500000000	59.5	67.6	0.659	538
N:GEXP:RAVER1:chr19:10426885:10444314:-:125950	RAVER1	GEXP	19	10426885	10444314	N:GEXP:TCOF1:chr5:149737202:149779871:+:6949	TCOF1	GEXP	5	149737202	149779871	500000000	59.3	67.4	0.658	538
N:GEXP:TCOF1:chr5:149737202:149779871:+:6949	TCOF1	GEXP	5	149737202	149779871	N:GEXP:ZNF668:chr16:31072164:31085641:-:79759	ZNF668	GEXP	16	31072164	31085641	500000000	58.9	67	0.657	538
N:GEXP:DLGAP4:chr20:34894303:35157040:+:22839	DLGAP4	GEXP	20	34894303	35157040	N:GEXP:TCOF1:chr5:149737202:149779871:+:6949	TCOF1	GEXP	5	149737202	149779871	500000000	58.9	67	0.657	538
N:GEXP:MED15:chr22:20861886:20941919:+:51586	MED15	GEXP	22	20861886	20941919	N:GEXP:TCOF1:chr5:149737202:149779871:+:6949	TCOF1	GEXP	5	149737202	149779871	500000000	58.2	66.3	0.654	538
N:GEXP:TCOF1:chr5:149737202:149779871:+:6949	TCOF1	GEXP	5	149737202	149779871	N:GEXP:ZC3H3:chr8:144519825:144623620:-:23144	ZC3H3	GEXP	8	144519825	144623620	500000000	57.9	65.9	0.653	538
N:GEXP:STX4:chr16:31044416:31051485:+:6810	STX4	GEXP	16	31044416	31051485	N:GEXP:TCOF1:chr5:149737202:149779871:+:6949	TCOF1	GEXP	5	149737202	149779871	500000000	57.7	65.8	0.652	538
N:GEXP:KRI1:chr19:10663761:10676702:-:65095	KRI1	GEXP	19	10663761	10676702	N:GEXP:TCOF1:chr5:149737202:149779871:+:6949	TCOF1	GEXP	5	149737202	149779871	500000000	56.6	64.7	0.648	538
N:GEXP:ATXN2L:chr16:28834414:28848558:+:11273	ATXN2L	GEXP	16	28834414	28848558	N:GEXP:TCOF1:chr5:149737202:149779871:+:6949	TCOF1	GEXP	5	149737202	149779871	500000000	56.3	64.3	0.647	538
N:GEXP:MXD3:chr5:176732501:176739292:-:83463	MXD3	GEXP	5	176732501	176739292	N:GEXP:TCOF1:chr5:149737202:149779871:+:6949	TCOF1	GEXP	5	149737202	149779871	26995299	56.2	64.3	0.647	538
N:GEXP:KCTD13:chr16:29917661:29937545:-:253980	KCTD13	GEXP	16	29917661	29937545	N:GEXP:TCOF1:chr5:149737202:149779871:+:6949	TCOF1	GEXP	5	149737202	149779871	500000000	55.5	63.6	0.644	538
N:GEXP:HNRNPAB:chr5:177631508:177638184:+:3182	HNRNPAB	GEXP	5	177631508	177638184	N:GEXP:TCOF1:chr5:149737202:149779871:+:6949	TCOF1	GEXP	5	149737202	149779871	27894306	55	63.1	0.642	538
N:GEXP:ASCC2:chr22:30184597:30234293:-:84164	ASCC2	GEXP	22	30184597	30234293	N:GEXP:TCOF1:chr5:149737202:149779871:+:6949	TCOF1	GEXP	5	149737202	149779871	500000000	54.7	62.8	0.641	538
N:GEXP:HMGXB3:chr5:149380169:149432706:+:22993	HMGXB3	GEXP	5	149380169	149432706	N:GEXP:TCOF1:chr5:149737202:149779871:+:6949	TCOF1	GEXP	5	149737202	149779871	357033	54.6	62.7	0.64	538
N:GEXP:ADRM1:chr20:60878027:60883918:+:11047	ADRM1	GEXP	20	60878027	60883918	N:GEXP:TCOF1:chr5:149737202:149779871:+:6949	TCOF1	GEXP	5	149737202	149779871	500000000	54.3	62.4	0.639	538
N:GEXP:NOP16:chr5:175810949:175815540:-:51491	NOP16	GEXP	5	175810949	175815540	N:GEXP:TCOF1:chr5:149737202:149779871:+:6949	TCOF1	GEXP	5	149737202	149779871	26073747	54.2	62.3	0.639	538
N:GEXP:DPP9:chr19:4675244:4723855:-:91039	DPP9	GEXP	19	4675244	4723855	N:GEXP:TCOF1:chr5:149737202:149779871:+:6949	TCOF1	GEXP	5	149737202	149779871	500000000	53.8	61.9	0.637	538
N:GEXP:GRAMD1A:chr19:35485688:35517373:+:57655	GRAMD1A	GEXP	19	35485688	35517373	N:GEXP:TCOF1:chr5:149737202:149779871:+:6949	TCOF1	GEXP	5	149737202	149779871	500000000	53.6	61.7	0.636	538
N:GEXP:PTBP1:chr19:797392:812327:+:5725	PTBP1	GEXP	19	797392	812327	N:GEXP:TCOF1:chr5:149737202:149779871:+:6949	TCOF1	GEXP	5	149737202	149779871	500000000	53.3	61.4	0.635	538
N:GEXP:SBNO2:chr19:1107633:1174282:-:22904	SBNO2	GEXP	19	1107633	1174282	N:GEXP:TCOF1:chr5:149737202:149779871:+:6949	TCOF1	GEXP	5	149737202	149779871	500000000	52.4	60.5	0.632	538
N:GEXP:TCOF1:chr5:149737202:149779871:+:6949	TCOF1	GEXP	5	149737202	149779871	N:GEXP:TMEM86B:chr19:55738002:55740632:-:255043	TMEM86B	GEXP	19	55738002	55740632	500000000	52.2	60.3	0.631	538
N:GEXP:FBXL6:chr8:145579088:145583036:-:26233	FBXL6	GEXP	8	145579088	145583036	N:GEXP:TCOF1:chr5:149737202:149779871:+:6949	TCOF1	GEXP	5	149737202	149779871	500000000	52.3	60.3	0.631	538
N:GEXP:PML:chr15:74287014:74340155:+:5371	PML	GEXP	15	74287014	74340155	N:GEXP:TCOF1:chr5:149737202:149779871:+:6949	TCOF1	GEXP	5	149737202	149779871	500000000	52.1	60.1	0.63	538
N:GEXP:B3GNTL1:chr17:80900031:81009686:-:146712	B3GNTL1	GEXP	17	80900031	81009686	N:GEXP:TCOF1:chr5:149737202:149779871:+:6949	TCOF1	GEXP	5	149737202	149779871	500000000	51.9	60	0.63	538
N:GEXP:SETD1A:chr16:30968615:30995981:+:9739	SETD1A	GEXP	16	30968615	30995981	N:GEXP:TCOF1:chr5:149737202:149779871:+:6949	TCOF1	GEXP	5	149737202	149779871	500000000	51.4	59.5	0.627	538
N:GEXP:SRM:chr1:11114649:11120091:-:6723	SRM	GEXP	1	11114649	11120091	N:GEXP:TCOF1:chr5:149737202:149779871:+:6949	TCOF1	GEXP	5	149737202	149779871	500000000	51.5	59.5	0.628	538
N:GEXP:SNRPA:chr19:41256759:41271297:+:6626	SNRPA	GEXP	19	41256759	41271297	N:GEXP:TCOF1:chr5:149737202:149779871:+:6949	TCOF1	GEXP	5	149737202	149779871	500000000	51.2	59.2	0.626	538
N:GEXP:TCOF1:chr5:149737202:149779871:+:6949	TCOF1	GEXP	5	149737202	149779871	N:GEXP:TELO2:chr16:1543352:1560460:+:9894	TELO2	GEXP	16	1543352	1560460	500000000	51.1	59.1	0.626	538
N:GEXP:TCOF1:chr5:149737202:149779871:+:6949	TCOF1	GEXP	5	149737202	149779871	N:GEXP:TMEM214:chr2:27255774:27264565:+:54867	TMEM214	GEXP	2	27255774	27264565	500000000	50.7	58.8	0.624	538
N:GEXP:TCOF1:chr5:149737202:149779871:+:6949	TCOF1	GEXP	5	149737202	149779871	N:GEXP:ZNF598:chr16:2047768:2059763:-:90850	ZNF598	GEXP	16	2047768	2059763	500000000	50.5	58.6	0.624	538
N:GEXP:DHX37:chr12:125431370:125473667:-:57647	DHX37	GEXP	12	125431370	125473667	N:GEXP:TCOF1:chr5:149737202:149779871:+:6949	TCOF1	GEXP	5	149737202	149779871	500000000	50.5	58.6	0.624	538
N:GEXP:TCOF1:chr5:149737202:149779871:+:6949	TCOF1	GEXP	5	149737202	149779871	N:GEXP:TROAP:chr12:49716971:49725514:+:10024	TROAP	GEXP	12	49716971	49725514	500000000	50.4	58.5	0.623	538
N:GEXP:AXIN1:chr16:337440:402676:-:8312	AXIN1	GEXP	16	337440	402676	N:GEXP:TCOF1:chr5:149737202:149779871:+:6949	TCOF1	GEXP	5	149737202	149779871	500000000	49.9	58	0.621	538
N:GEXP:PPAN:chr19:10216898:10221975:+:56342	PPAN	GEXP	19	10216898	10221975	N:GEXP:TCOF1:chr5:149737202:149779871:+:6949	TCOF1	GEXP	5	149737202	149779871	500000000	50	58	0.621	538
N:GEXP:REXO1:chr19:1815245:1848452:-:57455	REXO1	GEXP	19	1815245	1848452	N:GEXP:TCOF1:chr5:149737202:149779871:+:6949	TCOF1	GEXP	5	149737202	149779871	500000000	49.8	57.9	0.621	538
N:GEXP:TACC3:chr4:1723217:1746905:+:10460	TACC3	GEXP	4	1723217	1746905	N:GEXP:TCOF1:chr5:149737202:149779871:+:6949	TCOF1	GEXP	5	149737202	149779871	500000000	49.7	57.8	0.62	538
N:GEXP:HGS:chr17:79650962:79669151:+:9146	HGS	GEXP	17	79650962	79669151	N:GEXP:TCOF1:chr5:149737202:149779871:+:6949	TCOF1	GEXP	5	149737202	149779871	500000000	49.7	57.7	0.62	538
N:GEXP:E2F4:chr16:67226068:67232821:+:1874	E2F4	GEXP	16	67226068	67232821	N:GEXP:TCOF1:chr5:149737202:149779871:+:6949	TCOF1	GEXP	5	149737202	149779871	500000000	48.5	56.6	0.615	538
N:GEXP:RRP1:chr21:45209418:45223983:+:8568	RRP1	GEXP	21	45209418	45223983	N:GEXP:TCOF1:chr5:149737202:149779871:+:6949	TCOF1	GEXP	5	149737202	149779871	500000000	48.3	56.4	0.614	538
N:GEXP:C19ORF61:chr19:44235301:44259142:-:56006	C19ORF61	GEXP	19	44235301	44259142	N:GEXP:TCOF1:chr5:149737202:149779871:+:6949	TCOF1	GEXP	5	149737202	149779871	500000000	48.3	56.4	0.614	538
N:GEXP:NCLN:chr19:3185875:3209573:+:56926	NCLN	GEXP	19	3185875	3209573	N:GEXP:TCOF1:chr5:149737202:149779871:+:6949	TCOF1	GEXP	5	149737202	149779871	500000000	48.1	56.2	0.613	538
N:GEXP:B4GALT7:chr5:177027119:177037346:+:11285	B4GALT7	GEXP	5	177027119	177037346	N:GEXP:TCOF1:chr5:149737202:149779871:+:6949	TCOF1	GEXP	5	149737202	149779871	27289917	47.9	56	0.613	538
N:GEXP:SMPD4:chr2:130908965:130940323:-:55627	SMPD4	GEXP	2	130908965	130940323	N:GEXP:TCOF1:chr5:149737202:149779871:+:6949	TCOF1	GEXP	5	149737202	149779871	500000000	47.8	55.9	0.612	538
N:GEXP:MYBBP1A:chr17:4442191:4458681:-:10514	MYBBP1A	GEXP	17	4442191	4458681	N:GEXP:TCOF1:chr5:149737202:149779871:+:6949	TCOF1	GEXP	5	149737202	149779871	500000000	47.8	55.9	0.612	538
N:GEXP:NUDT1:chr7:2281857:2290780:+:4521	NUDT1	GEXP	7	2281857	2290780	N:GEXP:TCOF1:chr5:149737202:149779871:+:6949	TCOF1	GEXP	5	149737202	149779871	500000000	47.8	55.8	0.612	538
N:GEXP:AGAP3:chr7:150782954:150841523:+:116988	AGAP3	GEXP	7	150782954	150841523	N:GEXP:TCOF1:chr5:149737202:149779871:+:6949	TCOF1	GEXP	5	149737202	149779871	500000000	47.5	55.6	0.611	538
N:GEXP:SOLH:chr16:577856:604636:+:6650	SOLH	GEXP	16	577856	604636	N:GEXP:TCOF1:chr5:149737202:149779871:+:6949	TCOF1	GEXP	5	149737202	149779871	500000000	47.5	55.6	0.611	538
N:GEXP:RRBP1:chr20:17594323:17662928:-:6238	RRBP1	GEXP	20	17594323	17662928	N:GEXP:TCOF1:chr5:149737202:149779871:+:6949	TCOF1	GEXP	5	149737202	149779871	500000000	47.6	55.6	0.611	538
N:GEXP:CDCA3:chr12:6953963:6960456:-:83461	CDCA3	GEXP	12	6953963	6960456	N:GEXP:TCOF1:chr5:149737202:149779871:+:6949	TCOF1	GEXP	5	149737202	149779871	500000000	47.3	55.4	0.61	538
N:GEXP:DAZAP1:chr19:1407584:1435682:+:26528	DAZAP1	GEXP	19	1407584	1435682	N:GEXP:TCOF1:chr5:149737202:149779871:+:6949	TCOF1	GEXP	5	149737202	149779871	500000000	47.2	55.3	0.61	538
N:GEXP:TCOF1:chr5:149737202:149779871:+:6949	TCOF1	GEXP	5	149737202	149779871	N:GEXP:ZMIZ2:chr7:44788180:44810735:+:83637	ZMIZ2	GEXP	7	44788180	44810735	500000000	47	55.1	0.609	538
N:GEXP:APOL2:chr22:36622255:36636000:-:23780	APOL2	GEXP	22	36622255	36636000	N:GEXP:TCOF1:chr5:149737202:149779871:+:6949	TCOF1	GEXP	5	149737202	149779871	500000000	47	55.1	0.609	538
N:GEXP:NCKAP5L:chr12:50184929:50222208:-:57701	NCKAP5L	GEXP	12	50184929	50222208	N:GEXP:TCOF1:chr5:149737202:149779871:+:6949	TCOF1	GEXP	5	149737202	149779871	500000000	47	55	0.608	538
N:GEXP:ABCD1:chrX:152990323:153010216:+:215	ABCD1	GEXP	X	152990323	153010216	N:GEXP:TCOF1:chr5:149737202:149779871:+:6949	TCOF1	GEXP	5	149737202	149779871	500000000	46.9	55	0.608	538
N:GEXP:MOGS:chr2:74688184:74692537:-:7841	MOGS	GEXP	2	74688184	74692537	N:GEXP:TCOF1:chr5:149737202:149779871:+:6949	TCOF1	GEXP	5	149737202	149779871	500000000	46.9	55	0.608	538
N:GEXP:SF3A2:chr19:2236816:2248678:+:8175	SF3A2	GEXP	19	2236816	2248678	N:GEXP:TCOF1:chr5:149737202:149779871:+:6949	TCOF1	GEXP	5	149737202	149779871	500000000	46.9	55	0.608	538
N:GEXP:PRKRIP1:chr7:102004308:102067129:+:79706	PRKRIP1	GEXP	7	102004308	102067129	N:GEXP:TCOF1:chr5:149737202:149779871:+:6949	TCOF1	GEXP	5	149737202	149779871	500000000	46.9	54.9	0.608	538
N:GEXP:GRK6:chr5:176853687:176869850:+:2870	GRK6	GEXP	5	176853687	176869850	N:GEXP:TCOF1:chr5:149737202:149779871:+:6949	TCOF1	GEXP	5	149737202	149779871	27116485	46.5	54.6	0.606	538
N:GEXP:PMM2:chr16:8891670:8943194:+:5373	PMM2	GEXP	16	8891670	8943194	N:GEXP:TCOF1:chr5:149737202:149779871:+:6949	TCOF1	GEXP	5	149737202	149779871	500000000	46.4	54.4	0.606	538
N:GEXP:GLTSCR1:chr19:48111453:48206534:+:29998	GLTSCR1	GEXP	19	48111453	48206534	N:GEXP:TCOF1:chr5:149737202:149779871:+:6949	TCOF1	GEXP	5	149737202	149779871	500000000	46.3	54.4	0.605	538
N:GEXP:REEP4:chr8:21995533:21999448:-:80346	REEP4	GEXP	8	21995533	21999448	N:GEXP:TCOF1:chr5:149737202:149779871:+:6949	TCOF1	GEXP	5	149737202	149779871	500000000	46.2	54.3	0.605	538
N:GEXP:NUP62:chr19:50410084:50432988:-:23636	NUP62	GEXP	19	50410084	50432988	N:GEXP:TCOF1:chr5:149737202:149779871:+:6949	TCOF1	GEXP	5	149737202	149779871	500000000	46.3	54.3	0.605	538
N:GEXP:PTTG1:chr5:159848865:159855746:+:9232	PTTG1	GEXP	5	159848865	159855746	N:GEXP:TCOF1:chr5:149737202:149779871:+:6949	TCOF1	GEXP	5	149737202	149779871	10111663	46	54.1	0.604	538
N:GEXP:DHX34:chr19:47852538:47885961:+:9704	DHX34	GEXP	19	47852538	47885961	N:GEXP:TCOF1:chr5:149737202:149779871:+:6949	TCOF1	GEXP	5	149737202	149779871	500000000	45.9	54	0.604	538
N:GEXP:ANKRD13D:chr11:67056762:67069955:+:338692	ANKRD13D	GEXP	11	67056762	67069955	N:GEXP:TCOF1:chr5:149737202:149779871:+:6949	TCOF1	GEXP	5	149737202	149779871	500000000	45.6	53.7	0.602	538
N:GEXP:MORC2:chr22:31322600:31364187:-:22880	MORC2	GEXP	22	31322600	31364187	N:GEXP:TCOF1:chr5:149737202:149779871:+:6949	TCOF1	GEXP	5	149737202	149779871	500000000	45.5	53.6	0.602	538
N:GEXP:SH3BGRL3:chr1:26606213:26608013:+:83442	SH3BGRL3	GEXP	1	26606213	26608013	N:GEXP:TCOF1:chr5:149737202:149779871:+:6949	TCOF1	GEXP	5	149737202	149779871	500000000	45.3	53.4	0.601	538
N:GEXP:KIF18B:chr17:43002082:43025082:-:146909	KIF18B	GEXP	17	43002082	43025082	N:GEXP:TCOF1:chr5:149737202:149779871:+:6949	TCOF1	GEXP	5	149737202	149779871	500000000	45.1	53.2	0.6	538
N:GEXP:TCOF1:chr5:149737202:149779871:+:6949	TCOF1	GEXP	5	149737202	149779871	N:GEXP:TOMM40:chr19:45394477:45406946:+:10452	TOMM40	GEXP	19	45394477	45406946	500000000	44.9	53	0.599	538
N:GEXP:TCOF1:chr5:149737202:149779871:+:6949	TCOF1	GEXP	5	149737202	149779871	N:GEXP:ZNF341:chr20:32319808:32380075:+:84905	ZNF341	GEXP	20	32319808	32380075	500000000	44.8	52.9	0.599	538
N:GEXP:TCOF1:chr5:149737202:149779871:+:6949	TCOF1	GEXP	5	149737202	149779871	N:GEXP:UBE2C:chr20:44441255:44445596:+:11065	UBE2C	GEXP	20	44441255	44445596	500000000	44.8	52.9	0.599	538
N:GEXP:RBCK1:chr20:388709:411610:+:10616	RBCK1	GEXP	20	388709	411610	N:GEXP:TCOF1:chr5:149737202:149779871:+:6949	TCOF1	GEXP	5	149737202	149779871	500000000	44.8	52.9	0.599	538
N:GEXP:DGKZ:chr11:46354455:46402104:+:8525	DGKZ	GEXP	11	46354455	46402104	N:GEXP:TCOF1:chr5:149737202:149779871:+:6949	TCOF1	GEXP	5	149737202	149779871	500000000	44.8	52.9	0.599	538
N:GEXP:BRD9:chr5:863850:892939:-:65980	BRD9	GEXP	5	863850	892939	N:GEXP:TCOF1:chr5:149737202:149779871:+:6949	TCOF1	GEXP	5	149737202	149779871	148873352	44.6	52.7	0.598	538
N:GEXP:EFHD2:chr1:15736391:15756839:+:79180	EFHD2	GEXP	1	15736391	15756839	N:GEXP:TCOF1:chr5:149737202:149779871:+:6949	TCOF1	GEXP	5	149737202	149779871	500000000	44.6	52.7	0.598	538
N:GEXP:RHBDF2:chr17:74466975:74497509:-:79651	RHBDF2	GEXP	17	74466975	74497509	N:GEXP:TCOF1:chr5:149737202:149779871:+:6949	TCOF1	GEXP	5	149737202	149779871	500000000	44.5	52.6	0.597	538
N:GEXP:C15ORF42:chr15:90118818:90171253:+:90381	C15ORF42	GEXP	15	90118818	90171253	N:GEXP:TCOF1:chr5:149737202:149779871:+:6949	TCOF1	GEXP	5	149737202	149779871	500000000	44	52.1	0.595	538
N:GEXP:DDX56:chr7:44605403:44614137:-:54606	DDX56	GEXP	7	44605403	44614137	N:GEXP:TCOF1:chr5:149737202:149779871:+:6949	TCOF1	GEXP	5	149737202	149779871	500000000	43.9	52	0.595	538
N:GEXP:DDX39:chr19:14519610:14530195:-:10212	DDX39	GEXP	19	14519610	14530195	N:GEXP:TCOF1:chr5:149737202:149779871:+:6949	TCOF1	GEXP	5	149737202	149779871	500000000	43.6	51.7	0.593	538
N:GEXP:GPRIN1:chr5:176022803:176037131:-:114787	GPRIN1	GEXP	5	176022803	176037131	N:GEXP:TCOF1:chr5:149737202:149779871:+:6949	TCOF1	GEXP	5	149737202	149779871	26285601	43.5	51.6	0.593	538
N:GEXP:C7ORF27:chr7:2577444:2595392:-:221927	C7ORF27	GEXP	7	2577444	2595392	N:GEXP:TCOF1:chr5:149737202:149779871:+:6949	TCOF1	GEXP	5	149737202	149779871	500000000	43.4	51.5	0.592	538
N:GEXP:SART1:chr11:65729160:65747607:+:9092	SART1	GEXP	11	65729160	65747607	N:GEXP:TCOF1:chr5:149737202:149779871:+:6949	TCOF1	GEXP	5	149737202	149779871	500000000	43.4	51.5	0.592	538
N:GEXP:NOP56:chr20:2633178:2639039:+:10528	NOP56	GEXP	20	2633178	2639039	N:GEXP:TCOF1:chr5:149737202:149779871:+:6949	TCOF1	GEXP	5	149737202	149779871	500000000	43.4	51.5	0.592	538
N:GEXP:RECQL4:chr8:145736667:145743210:-:9401	RECQL4	GEXP	8	145736667	145743210	N:GEXP:TCOF1:chr5:149737202:149779871:+:6949	TCOF1	GEXP	5	149737202	149779871	500000000	43.4	51.4	0.592	538
N:GEXP:JAK3:chr19:17935591:17958841:-:3718	JAK3	GEXP	19	17935591	17958841	N:GEXP:TCOF1:chr5:149737202:149779871:+:6949	TCOF1	GEXP	5	149737202	149779871	500000000	43.3	51.3	0.591	538
N:GEXP:C7ORF47:chr7:100032912:100034094:-:221908	C7ORF47	GEXP	7	100032912	100034094	N:GEXP:TCOF1:chr5:149737202:149779871:+:6949	TCOF1	GEXP	5	149737202	149779871	500000000	43.3	51.3	0.591	538
N:GEXP:MYO9B:chr19:17186591:17324104:+:4650	MYO9B	GEXP	19	17186591	17324104	N:GEXP:TCOF1:chr5:149737202:149779871:+:6949	TCOF1	GEXP	5	149737202	149779871	500000000	43.2	51.3	0.591	538
N:GEXP:TCF3:chr19:1609289:1652328:-:6929	TCF3	GEXP	19	1609289	1652328	N:GEXP:TCOF1:chr5:149737202:149779871:+:6949	TCOF1	GEXP	5	149737202	149779871	500000000	43.1	51.2	0.591	538
N:GEXP:DDX41:chr5:176938578:176943967:-:51428	DDX41	GEXP	5	176938578	176943967	N:GEXP:TCOF1:chr5:149737202:149779871:+:6949	TCOF1	GEXP	5	149737202	149779871	27201376	43	51.1	0.59	538
N:GEXP:IRF3:chr19:50162826:50169132:-:3661	IRF3	GEXP	19	50162826	50169132	N:GEXP:TCOF1:chr5:149737202:149779871:+:6949	TCOF1	GEXP	5	149737202	149779871	500000000	42.9	51	0.59	538
N:GEXP:SFRS8:chr12:132195635:132284282:+:6433	SFRS8	GEXP	12	132195635	132284282	N:GEXP:TCOF1:chr5:149737202:149779871:+:6949	TCOF1	GEXP	5	149737202	149779871	500000000	42.8	50.9	0.589	538
N:GEXP:E4F1:chr16:2273567:2285743:+:1877	E4F1	GEXP	16	2273567	2285743	N:GEXP:TCOF1:chr5:149737202:149779871:+:6949	TCOF1	GEXP	5	149737202	149779871	500000000	42.7	50.8	0.589	538
N:GEXP:PLEKHA9:chr12:45566817:45609789:-:51054	PLEKHA9	GEXP	12	45566817	45609789	N:GEXP:TCOF1:chr5:149737202:149779871:+:6949	TCOF1	GEXP	5	149737202	149779871	500000000	42.8	50.8	0.589	538
N:GEXP:CHFR:chr12:133416938:133464204:-:55743	CHFR	GEXP	12	133416938	133464204	N:GEXP:TCOF1:chr5:149737202:149779871:+:6949	TCOF1	GEXP	5	149737202	149779871	500000000	42.7	50.8	0.589	538
N:GEXP:C19ORF50:chr19:18668572:18680197:+:79036	C19ORF50	GEXP	19	18668572	18680197	N:GEXP:TCOF1:chr5:149737202:149779871:+:6949	TCOF1	GEXP	5	149737202	149779871	500000000	42.6	50.7	0.588	538
N:GEXP:C19ORF66:chr19:10196806:10203928:+:55337	C19ORF66	GEXP	19	10196806	10203928	N:GEXP:TCOF1:chr5:149737202:149779871:+:6949	TCOF1	GEXP	5	149737202	149779871	500000000	42.5	50.6	0.588	538
N:GEXP:HSF1:chr8:145515270:145538385:+:3297	HSF1	GEXP	8	145515270	145538385	N:GEXP:TCOF1:chr5:149737202:149779871:+:6949	TCOF1	GEXP	5	149737202	149779871	500000000	42.4	50.5	0.587	538
N:GEXP:TCOF1:chr5:149737202:149779871:+:6949	TCOF1	GEXP	5	149737202	149779871	N:MIRN:HSA-MIR-15B:chr3:160122376:160122473:+:	HSA-MIR-15B	MIRN	3	160122376	160122473	500000000	21.8	29	0.468	520
N:GEXP:TCOF1:chr5:149737202:149779871:+:6949	TCOF1	GEXP	5	149737202	149779871	N:MIRN:HSA-MIR-21:chr17:57918627:57918698:+:	HSA-MIR-21	MIRN	17	57918627	57918698	500000000	18.7	25.9	0.445	520
N:GEXP:TCOF1:chr5:149737202:149779871:+:6949	TCOF1	GEXP	5	149737202	149779871	N:MIRN:HSA-MIR-3613:chr13:50570551:50570637:+:	HSA-MIR-3613	MIRN	13	50570551	50570637	500000000	16.7	23.9	0.428	520
N:GEXP:TCOF1:chr5:149737202:149779871:+:6949	TCOF1	GEXP	5	149737202	149779871	N:MIRN:HSA-MIR-625:chr14:65937820:65937904:+:	HSA-MIR-625	MIRN	14	65937820	65937904	500000000	16.3	23.5	0.425	520
N:GEXP:TCOF1:chr5:149737202:149779871:+:6949	TCOF1	GEXP	5	149737202	149779871	N:METH:CCDC105:chr19:15121531:::cg02489552	CCDC105 cg02489552	METH	19	15121531		500000000	14.9	23.4	0.435	492
N:GEXP:TCOF1:chr5:149737202:149779871:+:6949	TCOF1	GEXP	5	149737202	149779871	N:MIRN:HSA-MIR-106B:chr7:99691616:99691697:+:	HSA-MIR-106B	MIRN	7	99691616	99691697	500000000	16.1	23.3	0.424	520
N:GEXP:TCOF1:chr5:149737202:149779871:+:6949	TCOF1	GEXP	5	149737202	149779871	N:MIRN:HSA-MIR-155:chr21:26946292:26946356:+:	HSA-MIR-155	MIRN	21	26946292	26946356	500000000	15.8	23	0.421	520
N:GEXP:TCOF1:chr5:149737202:149779871:+:6949	TCOF1	GEXP	5	149737202	149779871	N:METH:SLC26A11:chr17:78194695:::cg24838010	SLC26A11 cg24838010	METH	17	78194695		500000000	14.4	22.9	0.431	492
N:GEXP:TCOF1:chr5:149737202:149779871:+:6949	TCOF1	GEXP	5	149737202	149779871	N:MIRN:HSA-MIR-130B:chr22:22007593:22007674:+:	HSA-MIR-130B	MIRN	22	22007593	22007674	500000000	15.3	22.5	0.417	520
N:GEXP:TCOF1:chr5:149737202:149779871:+:6949	TCOF1	GEXP	5	149737202	149779871	N:METH:PPAP2B:chr1:57045708:::cg16505550	PPAP2B cg16505550	METH	1	57045708		500000000	14	22.5	0.427	492
N:CNVR:5q33.1:chr5:150203000:150204999::	chr5:150,203,000-150,204,999 (2Mb, 5q33.1)	CNVR	5	150203000	150204999	N:GEXP:TCOF1:chr5:149737202:149779871:+:6949	TCOF1	GEXP	5	149737202	149779871	465798	14.2	22	0.426	484
N:CNVR:5q33.1:chr5:150223000:151514999::	chr5:150,223,000-151,514,999 (1bp, 5q33.1)	CNVR	5	150223000	151514999	N:GEXP:TCOF1:chr5:149737202:149779871:+:6949	TCOF1	GEXP	5	149737202	149779871	485798	14.1	21.9	0.407	532
N:CNVR:5q35.2:chr5:175421000:175460999::	chr5:175,421,000-175,460,999 (40Mb, 5q35.2)	CNVR	5	175421000	175460999	N:GEXP:TCOF1:chr5:149737202:149779871:+:6949	TCOF1	GEXP	5	149737202	149779871	25683798	13.9	21.7	0.405	532
N:CNVR:5q31.2:chr5:137741000:139177999::	chr5:137,741,000-139,177,999 (1bp, 5q31.2)	CNVR	5	137741000	139177999	N:GEXP:TCOF1:chr5:149737202:149779871:+:6949	TCOF1	GEXP	5	149737202	149779871	11996202	13.9	21.7	0.405	532
N:CNVR:5q31:chr5:139183000:140218999::	chr5:139,183,000-140,218,999 (1bp, 5q31)	CNVR	5	139183000	140218999	N:GEXP:TCOF1:chr5:149737202:149779871:+:6949	TCOF1	GEXP	5	149737202	149779871	10554202	13.8	21.6	0.404	532
N:CNVR:5q32:chr5:144221000:150202999::	chr5:144,221,000-150,202,999 (6bp, 5q32)	CNVR	5	144221000	150202999	N:GEXP:TCOF1:chr5:149737202:149779871:+:6949	TCOF1	GEXP	5	149737202	149779871	5516202	13.8	21.6	0.405	532
N:CNVR:5q33.1:chr5:150219000:150222999::	chr5:150,219,000-150,222,999 (4Mb, 5q33.1)	CNVR	5	150219000	150222999	N:GEXP:TCOF1:chr5:149737202:149779871:+:6949	TCOF1	GEXP	5	149737202	149779871	481798	13.6	21.4	0.421	481
N:CNVR:5q33:chr5:151521000:153845999::	chr5:151,521,000-153,845,999 (2bp, 5q33)	CNVR	5	151521000	153845999	N:GEXP:TCOF1:chr5:149737202:149779871:+:6949	TCOF1	GEXP	5	149737202	149779871	1783798	13.4	21.2	0.401	532
N:CNVR:5q31.3:chr5:140244000:144219999::	chr5:140,244,000-144,219,999 (4bp, 5q31.3)	CNVR	5	140244000	144219999	N:GEXP:TCOF1:chr5:149737202:149779871:+:6949	TCOF1	GEXP	5	149737202	149779871	9493202	13.3	21.1	0.4	532
N:GEXP:TCOF1:chr5:149737202:149779871:+:6949	TCOF1	GEXP	5	149737202	149779871	N:METH:SLC15A2:chr3:121613703:::cg18636558	SLC15A2 cg18636558	METH	3	121613703		500000000	12.3	20.8	0.412	492
N:GEXP:TCOF1:chr5:149737202:149779871:+:6949	TCOF1	GEXP	5	149737202	149779871	N:METH:DISP1:chr1:223101848:::cg10942056	DISP1 cg10942056	METH	1	223101848		500000000	12.3	20.8	0.411	492
N:GEXP:TCOF1:chr5:149737202:149779871:+:6949	TCOF1	GEXP	5	149737202	149779871	N:METH:MAMDC2:chr9:72658358:::cg13870494	MAMDC2 cg13870494	METH	9	72658358		500000000	12.2	20.7	0.411	492
N:GEXP:TCOF1:chr5:149737202:149779871:+:6949	TCOF1	GEXP	5	149737202	149779871	N:METH:TTC38:chr22:46663418:::cg06041363	TTC38 cg06041363	METH	22	46663418		500000000	11.6	20.1	0.405	492
N:GEXP:TCOF1:chr5:149737202:149779871:+:6949	TCOF1	GEXP	5	149737202	149779871	N:METH:ANKRD9:chr14:102975405:::cg16787352	ANKRD9 cg16787352	METH	14	102975405		500000000	11.6	20.1	0.405	492
N:GEXP:TCOF1:chr5:149737202:149779871:+:6949	TCOF1	GEXP	5	149737202	149779871	B:SAMP:I(C1,C2|mRNAclust_k4):::::	MRNAclust k4: 1 vs 2	SAMP				500000000	13.8	20	0.557	237
N:GEXP:TCOF1:chr5:149737202:149779871:+:6949	TCOF1	GEXP	5	149737202	149779871	N:METH:ZNF577:chr19:52391250:::cg16731240	ZNF577 cg16731240	METH	19	52391250		500000000	11.2	19.7	0.401	492
N:CNVR:5q35.2:chr5:173203000:173204999::	chr5:173,203,000-173,204,999 (2Mb, 5q35.2)	CNVR	5	173203000	173204999	N:GEXP:TCOF1:chr5:149737202:149779871:+:6949	TCOF1	GEXP	5	149737202	149779871	23465798	11.6	19.4	0.403	478
N:CNVR:5q35.2:chr5:175461000:175464999::	chr5:175,461,000-175,464,999 (4Mb, 5q35.2)	CNVR	5	175461000	175464999	N:GEXP:TCOF1:chr5:149737202:149779871:+:6949	TCOF1	GEXP	5	149737202	149779871	25723798	11.1	18.9	0.402	468
N:GEXP:TCOF1:chr5:149737202:149779871:+:6949	TCOF1	GEXP	5	149737202	149779871	B:SAMP:I(C1|mRNAclust_k4):::::	MRNAclust k4: 1	SAMP				500000000	10.9	17.1	0.404	417
N:GEXP:TCOF1:chr5:149737202:149779871:+:6949	TCOF1	GEXP	5	149737202	149779871	B:SAMP:I(C2,C3|mRNA_CNMF_3):::::	mRNA_CNMF_3 C2 vs C3	SAMP				500000000	0	2.7	0.416	53

## Sheet: LIHC
id_a	pretty_label_a	datatype_a	chr_a	start_a	end_a	id_b	pretty_label_b	datatype_b	chr_b	start_b	end_b	link_distance	adj_logged_pvalue	logged_pvalue	correlation	num_nonna
N:GEXP:RECQL4:chr8:145736667:145743210:-:9401	RECQL4	GEXP	8	145736667	145743210	N:GEXP:TCOF1:chr5:149737202:149779871:+:6949	TCOF1	GEXP	5	149737202	149779871	500000000	16.8	24.9	0.66	193
N:GEXP:PTTG1:chr5:159848865:159855746:+:9232	PTTG1	GEXP	5	159848865	159855746	N:GEXP:TCOF1:chr5:149737202:149779871:+:6949	TCOF1	GEXP	5	149737202	149779871	10068994	16.4	24.5	0.66	193
N:GEXP:MYBL2:chr20:42295709:42345122:+:4605	MYBL2	GEXP	20	42295709	42345122	N:GEXP:TCOF1:chr5:149737202:149779871:+:6949	TCOF1	GEXP	5	149737202	149779871	500000000	16.3	24.5	0.66	193
N:GEXP:RBM22:chr5:150070352:150080669:-:55696	RBM22	GEXP	5	150070352	150080669	N:GEXP:TCOF1:chr5:149737202:149779871:+:6949	TCOF1	GEXP	5	149737202	149779871	290481	16.1	24.2	0.65	193
N:GEXP:TCOF1:chr5:149737202:149779871:+:6949	TCOF1	GEXP	5	149737202	149779871	N:GEXP:TRIP13:chr5:892969:918164:+:9319	TRIP13	GEXP	5	892969	918164	148819038	15.9	24	0.65	193
N:GEXP:TACC3:chr4:1723217:1746905:+:10460	TACC3	GEXP	4	1723217	1746905	N:GEXP:TCOF1:chr5:149737202:149779871:+:6949	TCOF1	GEXP	5	149737202	149779871	500000000	15.9	24	0.65	193
N:GEXP:PKMYT1:chr16:3022792:3030540:-:9088	PKMYT1	GEXP	16	3022792	3030540	N:GEXP:TCOF1:chr5:149737202:149779871:+:6949	TCOF1	GEXP	5	149737202	149779871	500000000	15.9	24	0.65	193
N:GEXP:AURKB:chr17:8108049:8113883:-:9212	AURKB	GEXP	17	8108049	8113883	N:GEXP:TCOF1:chr5:149737202:149779871:+:6949	TCOF1	GEXP	5	149737202	149779871	500000000	15.8	23.9	0.65	193
N:GEXP:SNRPB:chr20:2442281:2451499:-:6628	SNRPB	GEXP	20	2442281	2451499	N:GEXP:TCOF1:chr5:149737202:149779871:+:6949	TCOF1	GEXP	5	149737202	149779871	500000000	15.5	23.6	0.65	193
N:GEXP:KIF2C:chr1:45205490:45233438:+:11004	KIF2C	GEXP	1	45205490	45233438	N:GEXP:TCOF1:chr5:149737202:149779871:+:6949	TCOF1	GEXP	5	149737202	149779871	500000000	15.3	23.4	0.65	193
N:GEXP:CDC20:chr1:43824626:43828873:+:991	CDC20	GEXP	1	43824626	43828873	N:GEXP:TCOF1:chr5:149737202:149779871:+:6949	TCOF1	GEXP	5	149737202	149779871	500000000	15.1	23.3	0.64	193
N:GEXP:CDT1:chr16:88870186:88875666:+:81620	CDT1	GEXP	16	88870186	88875666	N:GEXP:TCOF1:chr5:149737202:149779871:+:6949	TCOF1	GEXP	5	149737202	149779871	500000000	15.2	23.3	0.64	193
N:GEXP:CCNB1:chr5:68462837:68474070:+:891	CCNB1	GEXP	5	68462837	68474070	N:GEXP:TCOF1:chr5:149737202:149779871:+:6949	TCOF1	GEXP	5	149737202	149779871	81263132	15	23.2	0.64	193
N:GEXP:NOP56:chr20:2633178:2639039:+:10528	NOP56	GEXP	20	2633178	2639039	N:GEXP:TCOF1:chr5:149737202:149779871:+:6949	TCOF1	GEXP	5	149737202	149779871	500000000	14.8	22.9	0.64	193
N:GEXP:CDCA3:chr12:6953963:6960456:-:83461	CDCA3	GEXP	12	6953963	6960456	N:GEXP:TCOF1:chr5:149737202:149779871:+:6949	TCOF1	GEXP	5	149737202	149779871	500000000	14.5	22.6	0.64	193
N:GEXP:HMGA1:chr6:34204577:34214008:+:3159	HMGA1	GEXP	6	34204577	34214008	N:GEXP:TCOF1:chr5:149737202:149779871:+:6949	TCOF1	GEXP	5	149737202	149779871	500000000	14.5	22.6	0.64	193
N:GEXP:EME1:chr17:48450581:48458820:+:146956	EME1	GEXP	17	48450581	48458820	N:GEXP:TCOF1:chr5:149737202:149779871:+:6949	TCOF1	GEXP	5	149737202	149779871	500000000	14.2	22.3	0.63	193
N:GEXP:GRK6:chr5:176853687:176869850:+:2870	GRK6	GEXP	5	176853687	176869850	N:GEXP:TCOF1:chr5:149737202:149779871:+:6949	TCOF1	GEXP	5	149737202	149779871	27073816	14.2	22.3	0.63	193
N:GEXP:LOC388152:chr15:84867600:84898920:-:388152	LOC388152	GEXP	15	84867600	84898920	N:GEXP:TCOF1:chr5:149737202:149779871:+:6949	TCOF1	GEXP	5	149737202	149779871	500000000	14.2	22.3	0.63	193
N:GEXP:BIRC5:chr17:76210277:76221716:+:332	BIRC5	GEXP	17	76210277	76221716	N:GEXP:TCOF1:chr5:149737202:149779871:+:6949	TCOF1	GEXP	5	149737202	149779871	500000000	13.8	21.9	0.63	193
N:GEXP:C15orf42:chr15:90118818:90171253:+:90381	C15orf42	GEXP	15	90118818	90171253	N:GEXP:TCOF1:chr5:149737202:149779871:+:6949	TCOF1	GEXP	5	149737202	149779871	500000000	13.6	21.7	0.63	193
N:GEXP:TCOF1:chr5:149737202:149779871:+:6949	TCOF1	GEXP	5	149737202	149779871	N:GEXP:TROAP:chr12:49716971:49725514:+:10024	TROAP	GEXP	12	49716971	49725514	500000000	13.4	21.6	0.62	193
N:GEXP:CDCA5:chr11:64844927:64851615:-:113130	CDCA5	GEXP	11	64844927	64851615	N:GEXP:TCOF1:chr5:149737202:149779871:+:6949	TCOF1	GEXP	5	149737202	149779871	500000000	13.5	21.6	0.63	193
N:GEXP:NCAPG:chr4:17812525:17846487:+:64151	NCAPG	GEXP	4	17812525	17846487	N:GEXP:TCOF1:chr5:149737202:149779871:+:6949	TCOF1	GEXP	5	149737202	149779871	500000000	13.4	21.5	0.62	193
N:GEXP:POLD1:chr19:50887593:50921271:+:5424	POLD1	GEXP	19	50887593	50921271	N:GEXP:TCOF1:chr5:149737202:149779871:+:6949	TCOF1	GEXP	5	149737202	149779871	500000000	13	21.1	0.62	193
N:GEXP:FANCI:chr15:89787194:89860362:+:55215	FANCI	GEXP	15	89787194	89860362	N:GEXP:TCOF1:chr5:149737202:149779871:+:6949	TCOF1	GEXP	5	149737202	149779871	500000000	12.9	21	0.62	193
N:GEXP:CENPH:chr5:68485375:68506184:+:64946	CENPH	GEXP	5	68485375	68506184	N:GEXP:TCOF1:chr5:149737202:149779871:+:6949	TCOF1	GEXP	5	149737202	149779871	81231018	12.8	20.9	0.62	193
N:GEXP:G6PD:chrX:153759606:153775787:-:2539	G6PD	GEXP	X	153759606	153775787	N:GEXP:TCOF1:chr5:149737202:149779871:+:6949	TCOF1	GEXP	5	149737202	149779871	500000000	12.7	20.8	0.62	193
N:GEXP:TCOF1:chr5:149737202:149779871:+:6949	TCOF1	GEXP	5	149737202	149779871	N:GEXP:UBE2T:chr1:202300785:202311094:-:29089	UBE2T	GEXP	1	202300785	202311094	500000000	12.5	20.7	0.61	193
N:GEXP:TCOF1:chr5:149737202:149779871:+:6949	TCOF1	GEXP	5	149737202	149779871	N:GEXP:TRIM28:chr19:59055836:59062082:+:10155	TRIM28	GEXP	19	59055836	59062082	500000000	12.6	20.7	0.61	193
N:GEXP:STIP1:chr11:63953587:63972020:+:10963	STIP1	GEXP	11	63953587	63972020	N:GEXP:TCOF1:chr5:149737202:149779871:+:6949	TCOF1	GEXP	5	149737202	149779871	500000000	12.6	20.7	0.61	193
N:GEXP:TCOF1:chr5:149737202:149779871:+:6949	TCOF1	GEXP	5	149737202	149779871	N:GEXP:TUBA1B:chr12:49521565:49525304:-:10376	TUBA1B	GEXP	12	49521565	49525304	500000000	12.5	20.6	0.61	193
N:GEXP:MCM7:chr7:99690404:99699427:-:4176	MCM7	GEXP	7	99690404	99699427	N:GEXP:TCOF1:chr5:149737202:149779871:+:6949	TCOF1	GEXP	5	149737202	149779871	500000000	12.5	20.6	0.61	193
N:GEXP:SPC25:chr2:169727401:169746944:-:57405	SPC25	GEXP	2	169727401	169746944	N:GEXP:TCOF1:chr5:149737202:149779871:+:6949	TCOF1	GEXP	5	149737202	149779871	500000000	12.3	20.4	0.61	193
N:GEXP:SMYD5:chr2:73441366:73454355:+:10322	SMYD5	GEXP	2	73441366	73454355	N:GEXP:TCOF1:chr5:149737202:149779871:+:6949	TCOF1	GEXP	5	149737202	149779871	500000000	12.3	20.4	0.61	193
N:GEXP:TCOF1:chr5:149737202:149779871:+:6949	TCOF1	GEXP	5	149737202	149779871	N:GEXP:TONSL:chr8:145654163:145669812:-:4796	TONSL	GEXP	8	145654163	145669812	500000000	12.1	20.2	0.61	193
N:GEXP:CENPM:chr22:42334741:42343148:-:79019	CENPM	GEXP	22	42334741	42343148	N:GEXP:TCOF1:chr5:149737202:149779871:+:6949	TCOF1	GEXP	5	149737202	149779871	500000000	12.1	20.2	0.61	193
N:GEXP:TCOF1:chr5:149737202:149779871:+:6949	TCOF1	GEXP	5	149737202	149779871	N:GEXP:WDR62:chr19:36545783:36596012:+:284403	WDR62	GEXP	19	36545783	36596012	500000000	12	20.1	0.61	193
N:GEXP:SNRPD1:chr18:19192260:19210208:+:6632	SNRPD1	GEXP	18	19192260	19210208	N:GEXP:TCOF1:chr5:149737202:149779871:+:6949	TCOF1	GEXP	5	149737202	149779871	500000000	12	20.1	0.61	193
N:GEXP:HJURP:chr2:234745486:234763212:-:55355	HJURP	GEXP	2	234745486	234763212	N:GEXP:TCOF1:chr5:149737202:149779871:+:6949	TCOF1	GEXP	5	149737202	149779871	500000000	11.8	19.9	0.6	193
N:GEXP:KIF20A:chr5:137514417:137523404:+:10112	KIF20A	GEXP	5	137514417	137523404	N:GEXP:TCOF1:chr5:149737202:149779871:+:6949	TCOF1	GEXP	5	149737202	149779871	12213798	11.8	19.9	0.6	193
N:GEXP:NPM1:chr5:170814708:170837888:+:4869	NPM1	GEXP	5	170814708	170837888	N:GEXP:TCOF1:chr5:149737202:149779871:+:6949	TCOF1	GEXP	5	149737202	149779871	21034837	11.8	19.9	0.61	193
N:GEXP:TCOF1:chr5:149737202:149779871:+:6949	TCOF1	GEXP	5	149737202	149779871	N:GEXP:TRAIP:chr3:49866028:49893992:-:10293	TRAIP	GEXP	3	49866028	49893992	500000000	11.7	19.8	0.6	193
N:GEXP:PLK1:chr16:23690201:23701688:+:5347	PLK1	GEXP	16	23690201	23701688	N:GEXP:TCOF1:chr5:149737202:149779871:+:6949	TCOF1	GEXP	5	149737202	149779871	500000000	11.7	19.8	0.6	193
N:GEXP:EHMT2:chr6:31847537:31865464:-:10919	EHMT2	GEXP	6	31847537	31865464	N:GEXP:TCOF1:chr5:149737202:149779871:+:6949	TCOF1	GEXP	5	149737202	149779871	500000000	11.7	19.8	0.6	193
N:GEXP:RAD54L:chr1:46713367:46744145:+:8438	RAD54L	GEXP	1	46713367	46744145	N:GEXP:TCOF1:chr5:149737202:149779871:+:6949	TCOF1	GEXP	5	149737202	149779871	500000000	11.7	19.8	0.6	193
N:GEXP:ATIC:chr2:216176679:216214496:+:471	ATIC	GEXP	2	216176679	216214496	N:GEXP:TCOF1:chr5:149737202:149779871:+:6949	TCOF1	GEXP	5	149737202	149779871	500000000	11.7	19.8	0.6	193
N:GEXP:CCT5:chr5:10250282:10266501:+:22948	CCT5	GEXP	5	10250282	10266501	N:GEXP:TCOF1:chr5:149737202:149779871:+:6949	TCOF1	GEXP	5	149737202	149779871	139470701	11.6	19.7	0.6	193
N:GEXP:EXO1:chr1:242011493:242053241:+:9156	EXO1	GEXP	1	242011493	242053241	N:GEXP:TCOF1:chr5:149737202:149779871:+:6949	TCOF1	GEXP	5	149737202	149779871	500000000	11.4	19.6	0.6	193
N:GEXP:H2AFX:chr11:118964585:118966177:-:3014	H2AFX	GEXP	11	118964585	118966177	N:GEXP:TCOF1:chr5:149737202:149779871:+:6949	TCOF1	GEXP	5	149737202	149779871	500000000	11.4	19.5	0.6	193
N:GEXP:CLIC1:chr6:31698358:31704341:-:1192	CLIC1	GEXP	6	31698358	31704341	N:GEXP:TCOF1:chr5:149737202:149779871:+:6949	TCOF1	GEXP	5	149737202	149779871	500000000	11.3	19.4	0.6	193
N:GEXP:CDC25C:chr5:137620959:137674044:-:995	CDC25C	GEXP	5	137620959	137674044	N:GEXP:TCOF1:chr5:149737202:149779871:+:6949	TCOF1	GEXP	5	149737202	149779871	12063158	11.2	19.3	0.6	193
N:GEXP:SKA3:chr13:21727734:21750741:-:221150	SKA3	GEXP	13	21727734	21750741	N:GEXP:TCOF1:chr5:149737202:149779871:+:6949	TCOF1	GEXP	5	149737202	149779871	500000000	11.1	19.2	0.6	193
N:GEXP:TCOF1:chr5:149737202:149779871:+:6949	TCOF1	GEXP	5	149737202	149779871	N:GEXP:UBE2C:chr20:44441255:44445596:+:11065	UBE2C	GEXP	20	44441255	44445596	500000000	10.7	18.9	0.59	193
N:GEXP:CDK4:chr12:58141510:58146230:-:1019	CDK4	GEXP	12	58141510	58146230	N:GEXP:TCOF1:chr5:149737202:149779871:+:6949	TCOF1	GEXP	5	149737202	149779871	500000000	10.8	18.9	0.59	193
N:GEXP:RAD51:chr15:40987327:41024356:+:5888	RAD51	GEXP	15	40987327	41024356	N:GEXP:TCOF1:chr5:149737202:149779871:+:6949	TCOF1	GEXP	5	149737202	149779871	500000000	10.6	18.7	0.59	193
N:GEXP:CCNF:chr16:2479395:2508859:+:899	CCNF	GEXP	16	2479395	2508859	N:GEXP:TCOF1:chr5:149737202:149779871:+:6949	TCOF1	GEXP	5	149737202	149779871	500000000	10.4	18.6	0.59	193
N:GEXP:CCNB2:chr15:59397284:59417244:+:9133	CCNB2	GEXP	15	59397284	59417244	N:GEXP:TCOF1:chr5:149737202:149779871:+:6949	TCOF1	GEXP	5	149737202	149779871	500000000	10.5	18.6	0.59	193
N:GEXP:PSMC3IP:chr17:40724329:40729747:-:29893	PSMC3IP	GEXP	17	40724329	40729747	N:GEXP:TCOF1:chr5:149737202:149779871:+:6949	TCOF1	GEXP	5	149737202	149779871	500000000	10.4	18.5	0.59	193
N:GEXP:KIFC1:chr6:33359313:33377699:+:3833	KIFC1	GEXP	6	33359313	33377699	N:GEXP:TCOF1:chr5:149737202:149779871:+:6949	TCOF1	GEXP	5	149737202	149779871	500000000	10.2	18.4	0.58	193
N:GEXP:CDC45:chr22:19467414:19508135:+:8318	CDC45	GEXP	22	19467414	19508135	N:GEXP:TCOF1:chr5:149737202:149779871:+:6949	TCOF1	GEXP	5	149737202	149779871	500000000	10.3	18.4	0.59	193
N:GEXP:CWC27:chr5:64064755:64314590:+:10283	CWC27	GEXP	5	64064755	64314590	N:GEXP:TCOF1:chr5:149737202:149779871:+:6949	TCOF1	GEXP	5	149737202	149779871	85422612	10.3	18.4	0.59	193
N:GEXP:SF3A2:chr19:2236816:2248678:+:8175	SF3A2	GEXP	19	2236816	2248678	N:GEXP:TCOF1:chr5:149737202:149779871:+:6949	TCOF1	GEXP	5	149737202	149779871	500000000	10.3	18.4	0.58	193
N:GEXP:NUDT1:chr7:2281857:2290780:+:4521	NUDT1	GEXP	7	2281857	2290780	N:GEXP:TCOF1:chr5:149737202:149779871:+:6949	TCOF1	GEXP	5	149737202	149779871	500000000	10.3	18.4	0.59	193
N:GEXP:AATF:chr17:35306175:35414171:+:26574	AATF	GEXP	17	35306175	35414171	N:GEXP:TCOF1:chr5:149737202:149779871:+:6949	TCOF1	GEXP	5	149737202	149779871	500000000	10.2	18.3	0.58	193
N:GEXP:SNRPA:chr19:41256759:41271297:+:6626	SNRPA	GEXP	19	41256759	41271297	N:GEXP:TCOF1:chr5:149737202:149779871:+:6949	TCOF1	GEXP	5	149737202	149779871	500000000	10.2	18.3	0.58	193
N:GEXP:ASF1B:chr19:14230321:14247440:-:55723	ASF1B	GEXP	19	14230321	14247440	N:GEXP:TCOF1:chr5:149737202:149779871:+:6949	TCOF1	GEXP	5	149737202	149779871	500000000	10.1	18.2	0.58	193
N:GEXP:DHX34:chr19:47852538:47885961:+:9704	DHX34	GEXP	19	47852538	47885961	N:GEXP:TCOF1:chr5:149737202:149779871:+:6949	TCOF1	GEXP	5	149737202	149779871	500000000	10.1	18.2	0.58	193
N:GEXP:CEP55:chr10:95256369:95288849:+:55165	CEP55	GEXP	10	95256369	95288849	N:GEXP:TCOF1:chr5:149737202:149779871:+:6949	TCOF1	GEXP	5	149737202	149779871	500000000	10	18.1	0.58	193
N:GEXP:KIF4A:chrX:69509879:69640774:+:24137	KIF4A	GEXP	X	69509879	69640774	N:GEXP:TCOF1:chr5:149737202:149779871:+:6949	TCOF1	GEXP	5	149737202	149779871	500000000	9.9	18	0.58	193
N:GEXP:CENPW:chr6:126661253:126669754:+:387103	CENPW	GEXP	6	126661253	126669754	N:GEXP:TCOF1:chr5:149737202:149779871:+:6949	TCOF1	GEXP	5	149737202	149779871	500000000	9.9	18	0.58	193
N:GEXP:NUF2:chr1:163291723:163325553:+:83540	NUF2	GEXP	1	163291723	163325553	N:GEXP:TCOF1:chr5:149737202:149779871:+:6949	TCOF1	GEXP	5	149737202	149779871	500000000	9.7	17.9	0.58	193
N:GEXP:CDC25A:chr3:48198668:48229801:-:993	CDC25A	GEXP	3	48198668	48229801	N:GEXP:TCOF1:chr5:149737202:149779871:+:6949	TCOF1	GEXP	5	149737202	149779871	500000000	9.6	17.8	0.58	193
N:GEXP:FANCD2:chr3:10068113:10143614:+:2177	FANCD2	GEXP	3	10068113	10143614	N:GEXP:TCOF1:chr5:149737202:149779871:+:6949	TCOF1	GEXP	5	149737202	149779871	500000000	9.6	17.7	0.58	193
N:GEXP:NAP1L1:chr12:76438672:76478738:-:4673	NAP1L1	GEXP	12	76438672	76478738	N:GEXP:TCOF1:chr5:149737202:149779871:+:6949	TCOF1	GEXP	5	149737202	149779871	500000000	9.5	17.6	0.57	193
N:GEXP:ORC6:chr16:46723558:46732306:+:23594	ORC6	GEXP	16	46723558	46732306	N:GEXP:TCOF1:chr5:149737202:149779871:+:6949	TCOF1	GEXP	5	149737202	149779871	500000000	9.4	17.5	0.57	193
N:GEXP:SKA1:chr18:47901392:47920538:+:220134	SKA1	GEXP	18	47901392	47920538	N:GEXP:TCOF1:chr5:149737202:149779871:+:6949	TCOF1	GEXP	5	149737202	149779871	500000000	9.3	17.4	0.57	193
N:GEXP:INTS8:chr8:95835534:95892721:+:55656	INTS8	GEXP	8	95835534	95892721	N:GEXP:TCOF1:chr5:149737202:149779871:+:6949	TCOF1	GEXP	5	149737202	149779871	500000000	9.2	17.4	0.57	193
N:GEXP:CENPA:chr2:27008882:27023934:+:1058	CENPA	GEXP	2	27008882	27023934	N:GEXP:TCOF1:chr5:149737202:149779871:+:6949	TCOF1	GEXP	5	149737202	149779871	500000000	9.3	17.4	0.57	193
N:GEXP:MXD3:chr5:176732501:176739292:-:83463	MXD3	GEXP	5	176732501	176739292	N:GEXP:TCOF1:chr5:149737202:149779871:+:6949	TCOF1	GEXP	5	149737202	149779871	26952630	9.2	17.3	0.57	193
N:GEXP:NR2C2AP:chr19:19312224:19314238:-:126382	NR2C2AP	GEXP	19	19312224	19314238	N:GEXP:TCOF1:chr5:149737202:149779871:+:6949	TCOF1	GEXP	5	149737202	149779871	500000000	9.2	17.3	0.57	193
N:GEXP:SLC52A2:chr8:145582217:145584948:+:79581	SLC52A2	GEXP	8	145582217	145584948	N:GEXP:TCOF1:chr5:149737202:149779871:+:6949	TCOF1	GEXP	5	149737202	149779871	500000000	9.1	17.2	0.57	193
N:GEXP:FAM54A:chr6:136552168:136571449:-:113115	FAM54A	GEXP	6	136552168	136571449	N:GEXP:TCOF1:chr5:149737202:149779871:+:6949	TCOF1	GEXP	5	149737202	149779871	500000000	9.1	17.2	0.57	193
N:GEXP:TCOF1:chr5:149737202:149779871:+:6949	TCOF1	GEXP	5	149737202	149779871	N:GEXP:UCK2:chr1:165796732:165880855:+:7371	UCK2	GEXP	1	165796732	165880855	500000000	9	17.1	0.57	193
N:GEXP:RNASEH2A:chr19:12917428:12924462:+:10535	RNASEH2A	GEXP	19	12917428	12924462	N:GEXP:TCOF1:chr5:149737202:149779871:+:6949	TCOF1	GEXP	5	149737202	149779871	500000000	9	17.1	0.57	193
N:GEXP:TCOF1:chr5:149737202:149779871:+:6949	TCOF1	GEXP	5	149737202	149779871	N:GEXP:UBE2S:chr19:55912650:55919325:-:27338	UBE2S	GEXP	19	55912650	55919325	500000000	8.9	17	0.57	193
N:GEXP:AZI1:chr17:79163393:79196751:-:22994	AZI1	GEXP	17	79163393	79196751	N:GEXP:TCOF1:chr5:149737202:149779871:+:6949	TCOF1	GEXP	5	149737202	149779871	500000000	8.9	17	0.57	193
N:GEXP:KIF11:chr10:94352825:94415152:+:3832	KIF11	GEXP	10	94352825	94415152	N:GEXP:TCOF1:chr5:149737202:149779871:+:6949	TCOF1	GEXP	5	149737202	149779871	500000000	8.8	16.9	0.56	193
N:GEXP:GINS1:chr20:25388323:25429191:+:9837	GINS1	GEXP	20	25388323	25429191	N:GEXP:TCOF1:chr5:149737202:149779871:+:6949	TCOF1	GEXP	5	149737202	149779871	500000000	8.8	16.9	0.56	193
N:GEXP:MKI67:chr10:129894925:129924468:-:4288	MKI67	GEXP	10	129894925	129924468	N:GEXP:TCOF1:chr5:149737202:149779871:+:6949	TCOF1	GEXP	5	149737202	149779871	500000000	8.8	16.9	0.56	193
N:GEXP:CCDC137:chr17:79633761:79640936:+:339230	CCDC137	GEXP	17	79633761	79640936	N:GEXP:TCOF1:chr5:149737202:149779871:+:6949	TCOF1	GEXP	5	149737202	149779871	500000000	8.7	16.9	0.56	193
N:GEXP:NEK2:chr1:211831599:211848972:-:4751	NEK2	GEXP	1	211831599	211848972	N:GEXP:TCOF1:chr5:149737202:149779871:+:6949	TCOF1	GEXP	5	149737202	149779871	500000000	8.8	16.9	0.56	193
N:GEXP:C17orf53:chr17:42219274:42239844:+:78995	C17orf53	GEXP	17	42219274	42239844	N:GEXP:TCOF1:chr5:149737202:149779871:+:6949	TCOF1	GEXP	5	149737202	149779871	500000000	8.6	16.8	0.56	193
N:GEXP:MCM10:chr10:13203554:13253104:+:55388	MCM10	GEXP	10	13203554	13253104	N:GEXP:TCOF1:chr5:149737202:149779871:+:6949	TCOF1	GEXP	5	149737202	149779871	500000000	8.6	16.7	0.56	193
N:GEXP:C9orf100:chr9:35658872:35675863:-:84904	C9orf100	GEXP	9	35658872	35675863	N:GEXP:TCOF1:chr5:149737202:149779871:+:6949	TCOF1	GEXP	5	149737202	149779871	500000000	8.6	16.7	0.56	193
N:GEXP:KIAA0101:chr15:64657211:64673702:-:9768	KIAA0101	GEXP	15	64657211	64673702	N:GEXP:TCOF1:chr5:149737202:149779871:+:6949	TCOF1	GEXP	5	149737202	149779871	500000000	8.6	16.7	0.56	193
N:GEXP:DTL:chr1:212208919:212278187:+:51514	DTL	GEXP	1	212208919	212278187	N:GEXP:TCOF1:chr5:149737202:149779871:+:6949	TCOF1	GEXP	5	149737202	149779871	500000000	8.5	16.6	0.56	193
N:GEXP:CHEK1:chr11:125495031:125546150:+:1111	CHEK1	GEXP	11	125495031	125546150	N:GEXP:TCOF1:chr5:149737202:149779871:+:6949	TCOF1	GEXP	5	149737202	149779871	500000000	8.5	16.6	0.56	193
N:GEXP:POLR3C:chr1:145592605:145610884:-:10623	POLR3C	GEXP	1	145592605	145610884	N:GEXP:TCOF1:chr5:149737202:149779871:+:6949	TCOF1	GEXP	5	149737202	149779871	500000000	8.5	16.6	0.56	193
N:GEXP:TCF3:chr19:1609289:1652328:-:6929	TCF3	GEXP	19	1609289	1652328	N:GEXP:TCOF1:chr5:149737202:149779871:+:6949	TCOF1	GEXP	5	149737202	149779871	500000000	8.5	16.6	0.56	193
N:GEXP:DAZAP1:chr19:1407584:1435682:+:26528	DAZAP1	GEXP	19	1407584	1435682	N:GEXP:TCOF1:chr5:149737202:149779871:+:6949	TCOF1	GEXP	5	149737202	149779871	500000000	8.5	16.6	0.56	193
N:GEXP:PPIH:chr1:43124048:43142429:+:10465	PPIH	GEXP	1	43124048	43142429	N:GEXP:TCOF1:chr5:149737202:149779871:+:6949	TCOF1	GEXP	5	149737202	149779871	500000000	8.4	16.5	0.56	193
N:GEXP:CDK1:chr10:62538089:62554610:+:983	CDK1	GEXP	10	62538089	62554610	N:GEXP:TCOF1:chr5:149737202:149779871:+:6949	TCOF1	GEXP	5	149737202	149779871	500000000	8.4	16.5	0.56	193
N:GEXP:TCOF1:chr5:149737202:149779871:+:6949	TCOF1	GEXP	5	149737202	149779871	N:SAMP:RS65_Score:::::	RS65_Score	SAMP				500000000	8.1	14.1	0.52	193
N:GEXP:TCOF1:chr5:149737202:149779871:+:6949	TCOF1	GEXP	5	149737202	149779871	B:SAMP:I(C2|Hoshida_cluster):::::	Hoshida_cluster C2	SAMP				500000000	5.3	12.2	0.52	193
N:GEXP:TCOF1:chr5:149737202:149779871:+:6949	TCOF1	GEXP	5	149737202	149779871	B:SAMP:I(A|NCIP_cluster):::::	NCIP_cluster A	SAMP				500000000	5	11.9	0.51	193
N:GEXP:TCOF1:chr5:149737202:149779871:+:6949	TCOF1	GEXP	5	149737202	149779871	B:SAMP:I(C2,C3|Hoshida_cluster):::::	Hoshida_cluster C2 vs C3	SAMP				500000000	4.3	11.3	0.54	165
N:GEXP:TCOF1:chr5:149737202:149779871:+:6949	TCOF1	GEXP	5	149737202	149779871	B:SAMP:I(C2|HB16_cluster):::::	HB16_cluster C2	SAMP				500000000	3.6	10.5	0.48	193
N:GEXP:TCOF1:chr5:149737202:149779871:+:6949	TCOF1	GEXP	5	149737202	149779871	N:RPPA:PDK1:chr2:173420101:173489823:+:PDK1_pS241-R-V_bc	PDK1 (pS241)	RPPA	2	173420101	173489823	500000000	3.3	10.1	0.49	159
N:GEXP:TCOF1:chr5:149737202:149779871:+:6949	TCOF1	GEXP	5	149737202	149779871	N:RPPA:ATM:chr11:108093211:108239829:+:ATM-R-E_bc	ATM	RPPA	11	108093211	108239829	500000000	3.2	10	0.48	159
N:GEXP:TCOF1:chr5:149737202:149779871:+:6949	TCOF1	GEXP	5	149737202	149779871	N:RPPA:PDK1:chr2:173420101:173489823:+:PDK1_pS241	PDK1 (pS241)	RPPA	2	173420101	173489823	500000000	3	9.9	0.48	159
N:GEXP:TCOF1:chr5:149737202:149779871:+:6949	TCOF1	GEXP	5	149737202	149779871	N:RPPA:ATM:chr11:108093211:108239829:+:ATM	ATM	RPPA	11	108093211	108239829	500000000	2.9	9.8	0.48	159
N:GEXP:TCOF1:chr5:149737202:149779871:+:6949	TCOF1	GEXP	5	149737202	149779871	N:MIRN:hsa-miR-106b-5p:chr7:99691616:99691697:+:MIMAT0000680	hsa-miR-106b-5p	MIRN	7	99691616	99691697	500000000	2.7	9.8	0.44	189
N:GEXP:TCOF1:chr5:149737202:149779871:+:6949	TCOF1	GEXP	5	149737202	149779871	N:RPPA:XRCC5:chr2:216972187:217071026:+:Ku80-R-C_bc	XRCC5	RPPA	2	216972187	217071026	500000000	2.7	9.6	0.47	159
N:GEXP:TCOF1:chr5:149737202:149779871:+:6949	TCOF1	GEXP	5	149737202	149779871	N:RPPA:XRCC5:chr2:216972187:217071026:+:Ku80	XRCC5	RPPA	2	216972187	217071026	500000000	2.6	9.4	0.47	159
N:GEXP:TCOF1:chr5:149737202:149779871:+:6949	TCOF1	GEXP	5	149737202	149779871	N:RPPA:BRAF:chr7:140419127:140624564:-:B-Raf-M-C_bc	BRAF	RPPA	7	140419127	140624564	500000000	2.5	9.3	0.47	159
N:GEXP:TCOF1:chr5:149737202:149779871:+:6949	TCOF1	GEXP	5	149737202	149779871	N:RPPA:BRAF:chr7:140419127:140624564:-:B-Raf	BRAF	RPPA	7	140419127	140624564	500000000	2.4	9.3	0.47	159
N:CLIN:EPC_worstGrade:::::	EPC_worstGrade	CLIN				N:GEXP:TCOF1:chr5:149737202:149779871:+:6949	TCOF1	GEXP	5	149737202	149779871	500000000	3.3	9.2	0.44	180
N:GEXP:TCOF1:chr5:149737202:149779871:+:6949	TCOF1	GEXP	5	149737202	149779871	N:RPPA:BRD4:chr19:15347647:15443356:-:BRD4	BRD4	RPPA	19	15347647	15443356	500000000	2.2	9	0.46	159
N:GEXP:TCOF1:chr5:149737202:149779871:+:6949	TCOF1	GEXP	5	149737202	149779871	B:SAMP:I(CCL|CC-like_cluster):::::	CC-like_cluster CCL	SAMP				500000000	2	9	0.44	193
N:GEXP:TCOF1:chr5:149737202:149779871:+:6949	TCOF1	GEXP	5	149737202	149779871	N:RPPA:CCNB1:chr5:68462837:68474072:+:Cyclin_B1-R-V_bc	CCNB1	RPPA	5	68462837	68474072	81263130	1.8	8.7	0.45	159
N:GEXP:TCOF1:chr5:149737202:149779871:+:6949	TCOF1	GEXP	5	149737202	149779871	N:RPPA:MAPK14:chr6:35995488:36079013:+:p38-R-V_bc	MAPK14	RPPA	6	35995488	36079013	500000000	1.7	8.6	0.45	159
N:GEXP:TCOF1:chr5:149737202:149779871:+:6949	TCOF1	GEXP	5	149737202	149779871	B:SAMP:I(C4|LIHC-All_Samples_mRNAseq_CC_4):::::	LIHC-All_Samples_mRNAseq_CC_4 C4	SAMP				500000000	1.6	8.5	0.43	191
N:CLIN:EPC_gradePredom:::::	EPC_gradePredom	CLIN				N:GEXP:TCOF1:chr5:149737202:149779871:+:6949	TCOF1	GEXP	5	149737202	149779871	500000000	2.6	8.5	0.42	180
N:GEXP:TCOF1:chr5:149737202:149779871:+:6949	TCOF1	GEXP	5	149737202	149779871	N:RPPA:MAPK14:chr6:35995488:36079013:+:p38_MAPK	MAPK14	RPPA	6	35995488	36079013	500000000	1.5	8.3	0.44	159
N:GEXP:TCOF1:chr5:149737202:149779871:+:6949	TCOF1	GEXP	5	149737202	149779871	N:RPPA:FN1:chr2:216225163:216300895:-:Fibronectin-R-V_bc	FN1	RPPA	2	216225163	216300895	500000000	1.4	8.3	0.44	159
N:GEXP:TCOF1:chr5:149737202:149779871:+:6949	TCOF1	GEXP	5	149737202	149779871	N:MIRN:hsa-miR-3677-3p:chr16:2320714:2320773:+:MIMAT0018101	hsa-miR-3677-3p	MIRN	16	2320714	2320773	500000000	1.2	8.3	0.41	189
N:GEXP:TCOF1:chr5:149737202:149779871:+:6949	TCOF1	GEXP	5	149737202	149779871	N:RPPA:CCNB1:chr5:68462837:68474072:+:Cyclin_B1	CCNB1	RPPA	5	68462837	68474072	81263130	1.4	8.2	0.44	159
N:GEXP:TCOF1:chr5:149737202:149779871:+:6949	TCOF1	GEXP	5	149737202	149779871	N:MIRN:hsa-miR-421:chrX:73438212:73438296:+:MIMAT0003339	hsa-miR-421	MIRN	X	73438212	73438296	500000000	1.2	8.2	0.41	189
N:GEXP:TCOF1:chr5:149737202:149779871:+:6949	TCOF1	GEXP	5	149737202	149779871	N:RPPA:FN1:chr2:216225163:216300895:-:Fibronectin	FN1	RPPA	2	216225163	216300895	500000000	1.2	8.1	0.44	159
N:GEXP:TCOF1:chr5:149737202:149779871:+:6949	TCOF1	GEXP	5	149737202	149779871	B:SAMP:I(C1,C4|PARADIGM_cluster):::::	PARADIGM_cluster C1 vs C4	SAMP				500000000	1.1	8.1	0.63	85
N:GEXP:TCOF1:chr5:149737202:149779871:+:6949	TCOF1	GEXP	5	149737202	149779871	B:SAMP:episil_HFE2:::::	episil_HFE2	SAMP				500000000	1.2	8.1	0.42	193
N:GEXP:TCOF1:chr5:149737202:149779871:+:6949	TCOF1	GEXP	5	149737202	149779871	N:SAMP:CIN_arm_del:::::	CIN_arm_del	SAMP				500000000	2	8	0.4	188
N:GEXP:TCOF1:chr5:149737202:149779871:+:6949	TCOF1	GEXP	5	149737202	149779871	N:RPPA:EIF4EBP1:chr8:37887859:37917883:+:4E-BP1_pS65-R-V_bc	EIF4EBP1 (pS65)	RPPA	8	37887859	37917883	500000000	1	7.9	0.43	159
N:GEXP:TCOF1:chr5:149737202:149779871:+:6949	TCOF1	GEXP	5	149737202	149779871	N:MIRN:hsa-miR-3922-3p:chr12:104985411:104985494:+:MIMAT0018197	hsa-miR-3922-3p	MIRN	12	104985411	104985494	500000000	0.8	7.9	0.4	189
N:GEXP:TCOF1:chr5:149737202:149779871:+:6949	TCOF1	GEXP	5	149737202	149779871	N:SAMP:CIN_arm_tot:::::	CIN_arm_tot	SAMP				500000000	1.9	7.9	0.4	188
N:GEXP:TCOF1:chr5:149737202:149779871:+:6949	TCOF1	GEXP	5	149737202	149779871	N:RPPA:GSK3B:chr3:119540170:119813264:-:GSK3-alpha-beta-M-V_bc	GSK3B	RPPA	3	119540170	119813264	500000000	1	7.8	0.43	159
N:GEXP:TCOF1:chr5:149737202:149779871:+:6949	TCOF1	GEXP	5	149737202	149779871	N:RPPA:GSK3A:chr19:42734338:42746777:-:GSK3-alpha-beta-M-V_bc	GSK3A	RPPA	19	42734338	42746777	500000000	1	7.8	0.43	159
N:GEXP:TCOF1:chr5:149737202:149779871:+:6949	TCOF1	GEXP	5	149737202	149779871	B:SAMP:I(C3,C5|PARADIGM_cluster):::::	PARADIGM_cluster C3 vs C5	SAMP				500000000	0.9	7.8	0.69	68
N:GEXP:TCOF1:chr5:149737202:149779871:+:6949	TCOF1	GEXP	5	149737202	149779871	N:RPPA:SYK:chr9:93564069:93660831:+:Syk-M-V_bc	SYK	RPPA	9	93564069	93660831	500000000	0.9	7.7	0.43	159
N:GEXP:TCOF1:chr5:149737202:149779871:+:6949	TCOF1	GEXP	5	149737202	149779871	N:RPPA:BRAF:chr7:140419127:140624564:-:B-Raf_pS445	BRAF (pS445)	RPPA	7	140419127	140624564	500000000	0.8	7.7	0.43	159
N:GEXP:TCOF1:chr5:149737202:149779871:+:6949	TCOF1	GEXP	5	149737202	149779871	N:RPPA:TSC1:chr9:135766735:135820020:-:TSC1-R-C_bc	TSC1	RPPA	9	135766735	135820020	500000000	0.7	7.6	0.42	159
N:GEXP:TCOF1:chr5:149737202:149779871:+:6949	TCOF1	GEXP	5	149737202	149779871	N:RPPA:GSK3A:chr19:42734338:42746777:-:GSK3-alpha-beta	GSK3A	RPPA	19	42734338	42746777	500000000	0.7	7.6	0.42	159
N:GEXP:TCOF1:chr5:149737202:149779871:+:6949	TCOF1	GEXP	5	149737202	149779871	N:RPPA:SYK:chr9:93564069:93660831:+:Syk	SYK	RPPA	9	93564069	93660831	500000000	0.7	7.5	0.42	159
N:GEXP:TCOF1:chr5:149737202:149779871:+:6949	TCOF1	GEXP	5	149737202	149779871	N:RPPA:EIF4EBP1:chr8:37887859:37917883:+:4E-BP1_pS65	EIF4EBP1 (pS65)	RPPA	8	37887859	37917883	500000000	0.6	7.5	0.42	159
N:GEXP:TCOF1:chr5:149737202:149779871:+:6949	TCOF1	GEXP	5	149737202	149779871	N:RPPA:TSC2:chr16:2097466:2138716:+:Tuberin-R-E_bc	TSC2	RPPA	16	2097466	2138716	500000000	0.5	7.4	0.42	159
N:GEXP:TCOF1:chr5:149737202:149779871:+:6949	TCOF1	GEXP	5	149737202	149779871	N:RPPA:TSC1:chr9:135766735:135820020:-:TSC1	TSC1	RPPA	9	135766735	135820020	500000000	0.6	7.4	0.42	159
N:GEXP:TCOF1:chr5:149737202:149779871:+:6949	TCOF1	GEXP	5	149737202	149779871	B:SAMP:I(C3,C4|PARADIGM_cluster):::::	PARADIGM_cluster C3 vs C4	SAMP				500000000	0.5	7.4	0.7	63
N:GEXP:TCOF1:chr5:149737202:149779871:+:6949	TCOF1	GEXP	5	149737202	149779871	B:SAMP:I(C1,C4|mRNA_k5):::::	mRNA_k5 C1 vs C4	SAMP				500000000	0.5	7.4	0.52	115
N:GEXP:TCOF1:chr5:149737202:149779871:+:6949	TCOF1	GEXP	5	149737202	149779871	N:RPPA:RPS6:chr9:19375713:19380252:-:S6-R-E_bc	RPS6	RPPA	9	19375713	19380252	500000000	0.2	7.1	0.41	159
N:GEXP:TCOF1:chr5:149737202:149779871:+:6949	TCOF1	GEXP	5	149737202	149779871	N:RPPA:ARID1A:chr1:27022524:27108595:+:ARID1A	ARID1A	RPPA	1	27022524	27108595	500000000	0.3	7.1	0.41	159
N:GEXP:TCOF1:chr5:149737202:149779871:+:6949	TCOF1	GEXP	5	149737202	149779871	N:RPPA:TSC2:chr16:2097466:2138716:+:Tuberin	TSC2	RPPA	16	2097466	2138716	500000000	0.2	7.1	0.41	159
N:GEXP:TCOF1:chr5:149737202:149779871:+:6949	TCOF1	GEXP	5	149737202	149779871	N:RPPA:COG3:chr13:46039060:46110765:+:COG3	COG3	RPPA	13	46039060	46110765	500000000	0.1	7	0.41	159
N:GEXP:TCOF1:chr5:149737202:149779871:+:6949	TCOF1	GEXP	5	149737202	149779871	N:RPPA:RPS6:chr9:19375713:19380252:-:S6	RPS6	RPPA	9	19375713	19380252	500000000	0.1	7	0.41	159
N:GEXP:TCOF1:chr5:149737202:149779871:+:6949	TCOF1	GEXP	5	149737202	149779871	N:RPPA:RPTOR:chr17:78518619:78940171:+:Raptor-R-V_bc	RPTOR	RPPA	17	78518619	78940171	500000000	0	6.9	0.4	159
N:GEXP:TCOF1:chr5:149737202:149779871:+:6949	TCOF1	GEXP	5	149737202	149779871	N:RPPA:TP53BP1:chr15:43699407:43802926:-:53BP1-R-E_bc	TP53BP1	RPPA	15	43699407	43802926	500000000	0	6.8	0.4	159
N:GEXP:TCOF1:chr5:149737202:149779871:+:6949	TCOF1	GEXP	5	149737202	149779871	N:RPPA:RBM15:chr1:110881128:110889299:+:RBM15-R-V_bc	RBM15	RPPA	1	110881128	110889299	500000000	0	6.8	0.4	159
N:GEXP:TCOF1:chr5:149737202:149779871:+:6949	TCOF1	GEXP	5	149737202	149779871	B:SAMP:I(C1,C5|PARADIGM_cluster):::::	PARADIGM_cluster C1 vs C5	SAMP				500000000	0	6.6	0.55	90
N:GEXP:TCOF1:chr5:149737202:149779871:+:6949	TCOF1	GEXP	5	149737202	149779871	B:SAMP:I(High_plus_8q,Quiet|SCNA_cluster):::::	SCNA_cluster High_plus_8q vs Quiet	SAMP				500000000	0	5.7	0.61	61
N:GEXP:TCOF1:chr5:149737202:149779871:+:6949	TCOF1	GEXP	5	149737202	149779871	B:SAMP:I(C1,C4|LIHC-All_Samples_mRNAseq_CNMF_7):::::	LIHC-All_Samples_mRNAseq_CNMF_7 C1 vs C4	SAMP				500000000	0	4.8	0.48	82
B:CLIN:I(Macrotrabecular,Trabecular|EPC_patternMajor):::::	EPC_patternMajor Macrotrabecular vs Trabecular	CLIN				N:GEXP:TCOF1:chr5:149737202:149779871:+:6949	TCOF1	GEXP	5	149737202	149779871	500000000	0	4.8	0.46	90
N:GEXP:TCOF1:chr5:149737202:149779871:+:6949	TCOF1	GEXP	5	149737202	149779871	B:SAMP:I(C2,C4|LIHC-All_Samples_mRNAseq_CNMF_7):::::	LIHC-All_Samples_mRNAseq_CNMF_7 C2 vs C4	SAMP				500000000	0	4.6	0.54	62
N:GEXP:TCOF1:chr5:149737202:149779871:+:6949	TCOF1	GEXP	5	149737202	149779871	B:SAMP:I(C1,C3|mRNA_k5):::::	mRNA_k5 C1 vs C3	SAMP				500000000	0	4.3	0.42	95
N:GEXP:TCOF1:chr5:149737202:149779871:+:6949	TCOF1	GEXP	5	149737202	149779871	B:SAMP:I(C1,C3|LIHC-All_Samples_mRNAseq_CNMF_7):::::	LIHC-All_Samples_mRNAseq_CNMF_7 C1 vs C3	SAMP				500000000	0	4.2	0.58	49
N:GEXP:TCOF1:chr5:149737202:149779871:+:6949	TCOF1	GEXP	5	149737202	149779871	B:SAMP:I(C2,C3|LIHC-All_Samples_mRNAseq_CNMF_7):::::	LIHC-All_Samples_mRNAseq_CNMF_7 C2 vs C3	SAMP				500000000	0	3.6	0.69	29
N:GEXP:TCOF1:chr5:149737202:149779871:+:6949	TCOF1	GEXP	5	149737202	149779871	B:SAMP:I(C2,C4|PARADIGM_cluster):::::	PARADIGM_cluster C2 vs C4	SAMP				500000000	0	3.1	0.4	71
B:CLIN:I(C1,C20|EPC_percentSteatosis_cat):::::	EPC_percentSteatosis_cat C1 vs C20	CLIN				N:GEXP:TCOF1:chr5:149737202:149779871:+:6949	TCOF1	GEXP	5	149737202	149779871	500000000	0	2.5	0.7	19

[truncated: 5 more sheets: LUAD, LUSC, OV, STAD, UCEC]
